# Supplementary material for: Dynamic covalent and noncovalent assembly of o-nitrosocumene in organic solvents and water
Source: Royal Society of Chemistry journal article supplement (doi:10.1039/d4cc03955f), 2024-01-01
Supplement: d4cc03955f1.pdf [file d4cc03955f1.pdf]

## Electronic Supporting Information

### ***Dynamic Covalent and Noncovalent Assembly of *o*-Nitrosocumene in Organic Solvents and Water***

Cory H. Rogers,<sup>§</sup> Anu Pradeep,<sup>‡</sup> Layla A. Galiano,<sup>§</sup> S. Ariel Kelley,<sup>§</sup> Ramkumar Varadharajan,<sup>‡</sup> Ken Belmore,<sup>§</sup> Logan M. Whitt,<sup>§</sup> Yanmei Li,<sup>#</sup> Pier Alexandre Champagne,<sup>#</sup> Vaidhyanathan Ramamurthy,<sup>‡\*</sup> Silas C. Blackstock<sup>§\*</sup>

<sup>§</sup> Department of Chemistry, The University of Alabama, Tuscaloosa, AL 35487

<sup>‡</sup> Department of Chemistry, University of Miami, Coral Gables, Florida 33146

<sup>#</sup> Department of Chemistry and Environmental Science, New Jersey Institute of Technology, Newark, NJ 07102

\* corresponding authors

#### Contents

##### 1. General information and procedures

##### 2. Preparation of *o*-nitrosocumene, *o*-NC

|        |                                                                                       |     |
|--------|---------------------------------------------------------------------------------------|-----|
| Fig S1 | <sup>1</sup> H-NMR spectrum of <i>o</i> -NC in CDCl <sub>3</sub> (monomer)            | S7  |
| Fig S2 | <sup>13</sup> C-NMR spectrum of <i>o</i> -NC in CDCl <sub>3</sub> (monomer)           | S8  |
| Fig S3 | <sup>1</sup> H-NMR spectrum of <i>o</i> -NC in CDCl <sub>3</sub> (monomer and dimers) | S9  |
| Fig S4 | <sup>13</sup> C-NMR spectrum of <i>o</i> -NC in CDCl <sub>3</sub> (higher conc.)      | S10 |
| Fig S5 | Expansions of Fig S4 <sup>13</sup> C-NMR spectrum                                     | S10 |
| Fig S6 | <sup>13</sup> C-NMR, DEPT135, DEPT90 spectra of <i>o</i> -NC in CDCl <sub>3</sub>     | S11 |
| Fig S7 | <sup>13</sup> C-NMR spectrum of <i>o</i> -NC in D <sub>2</sub> O                      | S12 |

##### 3. X-ray crystallography of *o*-NC and cold NMR analysis of dissolved crystals in CD<sub>3</sub>OD

|          |                                                                                                          |     |
|----------|----------------------------------------------------------------------------------------------------------|-----|
| Table S1 | Crystal data for <i>o</i> -NC D <sub>Z</sub> (anti)                                                      | S14 |
| Fig S8   | Crystal structure for <i>o</i> -NC D <sub>Z</sub> (anti)                                                 | S15 |
| Fig S9   | ORTEP diagram for <i>o</i> -NC D <sub>Z</sub> (anti)                                                     | S15 |
| Table S2 | Bond lengths for <i>o</i> -NC D <sub>Z</sub> (anti)                                                      | S16 |
| Table S3 | Bond angles for <i>o</i> -NC D <sub>Z</sub> (anti)                                                       | S16 |
| Table S4 | Torsional angles for <i>o</i> -NC D <sub>Z</sub> (anti)                                                  | S17 |
| Fig S10  | <sup>1</sup> H-NMR spectrum <i>o</i> -NC D <sub>Z</sub> (anti) crystal at -68.0 °C in CD <sub>3</sub> OD | S18 |

##### 4. EXSY <sup>1</sup>H-NMR spectrum of *o*-NC in CDCl<sub>3</sub> and M, D<sub>Z</sub>, and D<sub>E</sub> signal assignments

|         |                                                                        |     |
|---------|------------------------------------------------------------------------|-----|
| Fig S11 | 2D EXSY spectrum of <i>o</i> -NC in CDCl <sub>3</sub> (full spectrum)  | S19 |
| Fig S12 | 2D EXSY spectrum of <i>o</i> -NC in CDCl <sub>3</sub> (methine region) | S20 |
| Fig S13 | 2D EXSY spectrum of <i>o</i> -NC in CDCl <sub>3</sub> (methyl region)  | S21 |

## 5. VT-NMR analysis for monomer and dimer distributions of *o*-NC in CDCl<sub>3</sub>, (CD<sub>3</sub>)<sub>2</sub>CO, CD<sub>3</sub>OD, CD<sub>3</sub>CN, and D<sub>2</sub>O

|           |                                                                                                         |     |
|-----------|---------------------------------------------------------------------------------------------------------|-----|
| Fig S14   | VT <sup>1</sup> H-NMR spectra of <i>o</i> -NC in CDCl <sub>3</sub>                                      | S22 |
| Table S5  | VT <sup>1</sup> H-NMR integrations of <i>o</i> -NC in CDCl <sub>3</sub>                                 | S23 |
| Fig S15   | Van't Hoff Plot of <i>o</i> -NC in CDCl <sub>3</sub>                                                    | S23 |
| Table S6  | Summary of VT <sup>1</sup> H-NMR independent runs of <i>o</i> -NC in CDCl <sub>3</sub>                  | S24 |
| Fig S16   | VT <sup>1</sup> H-NMR spectra of <i>o</i> -NC in (CD <sub>3</sub> ) <sub>2</sub> CO                     | S25 |
| Table S7  | VT <sup>1</sup> H-NMR integrations of <i>o</i> -NC in (CD <sub>3</sub> ) <sub>2</sub> CO                | S27 |
| Fig S17   | Van't Hoff Plot of <i>o</i> -NC in (CD <sub>3</sub> ) <sub>2</sub> CO                                   | S27 |
| Table S8  | Summary of VT <sup>1</sup> H-NMR independent runs of <i>o</i> -NC in (CD <sub>3</sub> ) <sub>2</sub> CO | S28 |
| Fig S18   | VT <sup>1</sup> H-NMR spectra of <i>o</i> -NC in CD <sub>3</sub> OD                                     | S29 |
| Table S9  | VT <sup>1</sup> H-NMR integrations of <i>o</i> -NC in CD <sub>3</sub> OD                                | S30 |
| Fig S19   | Van't Hoff Plot of <i>o</i> -NC in CD <sub>3</sub> OD                                                   | S30 |
| Table S10 | Summary of VT <sup>1</sup> H-NMR independent runs of <i>o</i> -NC in CD <sub>3</sub> OD                 | S31 |
| Fig S20   | VT <sup>1</sup> H-NMR spectra of <i>o</i> -NC in CD <sub>3</sub> CN                                     | S32 |
| Table S11 | VT <sup>1</sup> H-NMR integrations of <i>o</i> -NC in CD <sub>3</sub> CN                                | S33 |
| Fig S21   | Van't Hoff Plot of <i>o</i> -NC in CD <sub>3</sub> CN                                                   | S33 |
| Table S12 | Summary of VT <sup>1</sup> H-NMR independent runs of <i>o</i> -NC in CD <sub>3</sub> CN                 | S34 |
| Fig S22   | VT <sup>1</sup> H-NMR spectra of <i>o</i> -NC in D <sub>2</sub> O                                       | S35 |
| Table S13 | VT <sup>1</sup> H-NMR integrations of <i>o</i> -NC in D <sub>2</sub> O                                  | S36 |
| Fig S23   | Van't Hoff Plot of <i>o</i> -NC in D <sub>2</sub> O                                                     | S36 |
| Table S14 | Summary of VT <sup>1</sup> H-NMR independent runs of <i>o</i> -NC in D <sub>2</sub> O                   | S37 |
| Fig S24   | VT <sup>1</sup> H-NMR spectra of <i>o</i> -NC in D <sub>2</sub> O (higher resolution)                   | S38 |

## 6. <sup>1</sup>H-NMR of *o*-NC aggregate formation in D<sub>2</sub>O at variable concentrations and times

|         |                                                                           |     |
|---------|---------------------------------------------------------------------------|-----|
| Fig S25 | <sup>1</sup> H-NMR spectra <i>o</i> -NC in D <sub>2</sub> O (conc. study) | S39 |
| Fig S26 | Plot of <i>o</i> -NC species over various concentrations                  | S40 |
| Fig S27 | <sup>1</sup> H-NMR spectra <i>o</i> -NC in D <sub>2</sub> O (time study)  | S41 |
| Fig S28 | Plot of <i>o</i> -NC species over time                                    | S42 |

## 7. *o*-NC aggregate analysis in water via COSY, EXSY, DOSY NMR spectroscopy

|           |                                                                       |     |
|-----------|-----------------------------------------------------------------------|-----|
| Fig S29   | 2D COSY spectrum of <i>o</i> -NC in D <sub>2</sub> O                  | S43 |
| Fig S30   | 2D EXSY spectrum of <i>o</i> -NC in D <sub>2</sub> O (full spectrum)  | S44 |
| Fig S31   | 2D EXSY spectrum of <i>o</i> -NC in D <sub>2</sub> O (methine region) | S45 |
| Fig S32   | 2D EXSY spectrum of <i>o</i> -NC in D <sub>2</sub> O (methyl region)  | S46 |
| Fig S33   | 2D DOSY spectrum of <i>o</i> -NC in D <sub>2</sub> O (full spectrum)  | S47 |
| Table S15 | DOSY diffusion coefficients and hydrodynamic radii                    | S48 |
| Fig S34   | UV-Vis spectra of <i>o</i> -NC in D <sub>2</sub> O                    | S49 |
| Fig S35   | DLS plots of <i>o</i> -NC in D <sub>2</sub> O                         | S50 |

## 8. DFT calculation data supporting *o*-NC assembly in organic solvents and water

|         |                                                        |     |
|---------|--------------------------------------------------------|-----|
| Fig S36 | PES from Monomer to Dimers in chloroform               | S52 |
| Fig S37 | HOMO and LUMO for monomer in chloroform                | S52 |
| Fig S38 | PES from Monomer to Dimers in water                    | S53 |
| Fig S39 | PES of phenyl rotation within the D <sub>Z</sub> dimer | S53 |
| Fig S40 | PES for nitrosobenzene dimerization                    | S54 |
| Fig S41 | Hydrophobic effect for M to D <sub>Z</sub> in water    | S54 |

### 1. General information and procedures

NMR spectra were recorded on Bruker AM-360, AM-500 and NEO-500 spectrometers using deuterated solvents (Cambridge Isotopes) with chemical shifts referenced to residual nondeuterated solvent signal. Signal quantitation was performed by signal integration relative to that for added internal standard (NaOAc, MeOH, mesitylene, or Me<sub>2</sub>SO<sub>2</sub>). ACS grade dichloromethane (DCM, CH<sub>2</sub>Cl<sub>2</sub>) and deionized water (DI H<sub>2</sub>O) were used without further purification for all reactions of *o*-NC.

#### VT-NMR

Variable Temperature (VT) <sup>1</sup>H-NMR spectroscopy was conducted with probe cooling on a 360 MHz NMR spectrometer. From a N<sub>2</sub> cylinder equipped with a regulator, a line of N<sub>2</sub> gas is plumbed directly to the spectrometer via a Cu coil fully submerged in liquid N<sub>2</sub>. The gas flow (L/h) and temperature (K) are controlled using Topspin “EDTE” command at the instrument console until target temperature is achieved and remains constant for ~5 min. Evidence of M,D equilibration may be obtained by collecting multiple spectra at a target temperature at different times (waiting 5-30 min as needed). Sample temperature was measured using a sealed capillary of CD<sub>3</sub>OD included in the sample tube as a CD<sub>3</sub>OD chemical thermometer according to the method and calibrations reported by Griesinger and coworkers.<sup>1</sup> Integral values relative to a given internal standard were scaled based on the number of nuclei for each signal to subsequently calculate K<sub>m</sub> for D<sub>E</sub> ⇌ 2M and D<sub>Z</sub> ⇌ 2M. Van’t Hoff plots of ln (K<sub>m</sub>) vs. 1/T (1/K) were created. Using the LINEST function in excel, the slope and intercept were obtained (along with respective errors) and used to extract ΔH° and ΔS° for the monomerizations. Vertical error bars were added based on the standard deviation (2σ) of the y-values (ln (K<sub>m</sub>)).

#### *o*-NC VT-NMR general methods:

Solids were weighed on a (Ohaus Adventurer) analytical balance to 0.1 mg and volumes were measured in oven-dried 1.00 mL volumetric flasks or using Hamilton GASTIGHT® microliter syringes to 0.1 mL. All deuterated solvents were used as purchased from Cambridge Isotopes. Cleaned, dried 3 mm precision NMR tubes were used. A clean, flame-sealed capillary tube of CD<sub>3</sub>OD (99.8%) was added to all samples as a chemical thermometer to measure the internal temperature of the sample (see ref 1). The 4<sup>th</sup> degree polynomial shown below was used to calibrate the temperature for a given <sup>1</sup>H-NMR spectrum based on the chemical shift difference between residual CH<sub>3</sub> and OH signals.

$$T/K = \sum_{i=0}^4 a_i (\Delta\delta/\text{ppm})^i$$

| <i>i</i>             | 0        | 1        | 2        | 3       | 4       |
|----------------------|----------|----------|----------|---------|---------|
| <i>a<sub>i</sub></i> | 416.4745 | -39.5133 | -36.0620 | 11.4869 | -2.4340 |

Eq 1.

<sup>1</sup> N. Karschin, S. Krenek, D. Heyer and C. Griesinger, *Magn. Reson. Chem.*, 2022, **60**, 203-209.

***o*-NC VT-NMR sample preparation (by solvent):**

- CDCl<sub>3</sub>: 0.363 M *o*-NC and 0.166 M dimethylsulfone in CDCl<sub>3</sub>, respectively.
- (CD<sub>3</sub>)<sub>2</sub>CO: 0.275 M *o*-NC and 0.180 M mesitylene in (CD<sub>3</sub>)<sub>2</sub>CO, respectively.
- CD<sub>3</sub>OD: 0.190 M *o*-NC and 0.180 M mesitylene in CD<sub>3</sub>OD, respectively. The CD<sub>3</sub>OD residual nondeuterated solvent signals were used in place of a sealed capillary of CD<sub>3</sub>OD.
- CD<sub>3</sub>CN: 0.109 M *o*-NC and 0.0358 M mesitylene in CD<sub>3</sub>CN, respectively.
- D<sub>2</sub>O: From 0.0697 M *o*-NC stock solution in DMSO-d<sub>6</sub> was prepared 2.37 mM *o*-NC and 1.96 mM NaOAc in D<sub>2</sub>O, respectively.

For D<sub>2</sub>O concentration studies, subsequent volumes of an *o*-NC DMSO-d<sub>6</sub> stock solution (in 5-10 μL increments) were added and the <sup>1</sup>H-NMR spectrum was obtained after each addition.

## 2. Preparation of *o*-nitrosocumene, *o*-NC<sup>2</sup>

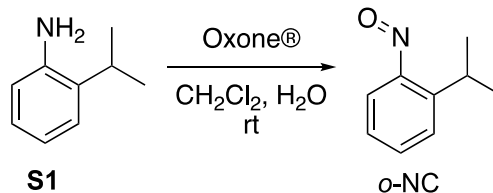

2-aminocumene (2.00 g, 0.0148 mol) (Ambeed) was weighed into a 250 mL round bottom flask equipped with a large stir bar and dissolved in 60 mL CH<sub>2</sub>Cl<sub>2</sub> (DCM). Separately, Oxone® [2KHSO<sub>5</sub> · KHSO<sub>4</sub> · K<sub>2</sub>SO<sub>4</sub>] (BeanTown Chemical) (18.2 g, 0.0296 mol) was dissolved in a minimal amount of deionized H<sub>2</sub>O (~100 mL) giving a saturated solution, which was then added to the solution of aminocumene **S1** and the mixture was stirred vigorously. The reaction was monitored by TLC (silica gel, 1:4 EtOAc:hexane) for consumption of starting material, which occurred at ~3.5 hours. The colored organic layer was then removed using a separatory funnel, and the aqueous layer washed with DCM (3 x 25 mL). The combined organic layers were dried over anhydr Na<sub>2</sub>SO<sub>4</sub>, filtered, concentrated *in vacuo* to a volume of ~ 5 mL, capped, and placed in the freezer (-15 °C) overnight. Crystals of *o*-NC formed, were filtered, and washed with a minimal amount of cold DCM, and subsequently recrystallized in ~1 mL of DCM with slow cooling to -15 °C to provide pure, colorless crystalline solid (0.592 g, 26.8%).

<sup>1</sup>H NMR (500 MHz, CDCl<sub>3</sub>): δ (ppm) 7.69 (m, 2H), 7.13 (t, *J* = 8.2 Hz, 1H), 6.09 (d, *J* = 8.2 Hz, 1H), 5.29 (septet, *J* = 6.9 Hz, 1H), 1.57 (d, *J* = 6.9 Hz, 6H). <sup>13</sup>C NMR (126 MHz, CDCl<sub>3</sub>): δ (ppm) 164.0 (C), 152.9 (C), 136.9 (CH), 128.2 (CH), 125.5 (CH), 105.6 (CH), 27.4 (CH), 24.5 (CH<sub>3</sub>).

<sup>2</sup> Biphasic CH<sub>2</sub>Cl<sub>2</sub>/oxone is a generally useful for N-oxygenation reactions (a) S. C. Blackstock, K. Poehling and M. L. Greer, *J. Am. Chem. Soc.*, 1995, **117**, 6617-6618; (b) M. L. Greer, B. J. McGee, R. D. Rogers and S. C. Blackstock, *Angew. Chem. Int. Ed. Engl.*, 1997, **36**, 1864-1866; (c) B. Priewisch and K. Rück-Braun, *J. Org. Chem.*, 2005, **70**, 2350-2352. *o*-NC preparations: (a) R.-Q. Ran, S.-D. Xiu and C.-Y. Li, *Org. Lett.*, 2014, **16**, 6394-6396; (b) S. A. Kelley, Ph.D. Dissertation, The University of Alabama, 2021.



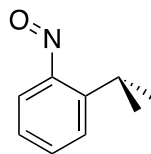

**M**

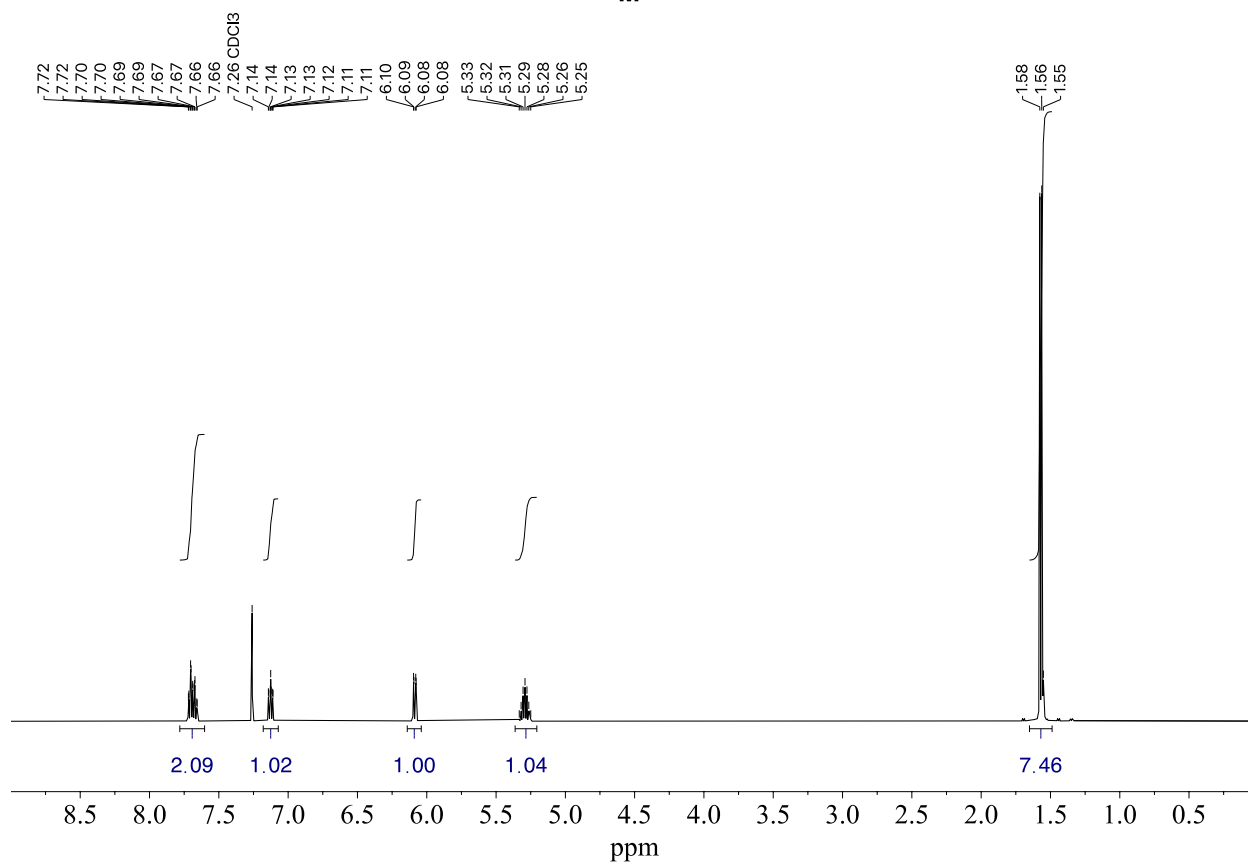

**Figure S1.** <sup>1</sup>H-NMR spectrum (500 MHz) 0.0544 M *o*-NC in CDCl<sub>3</sub>

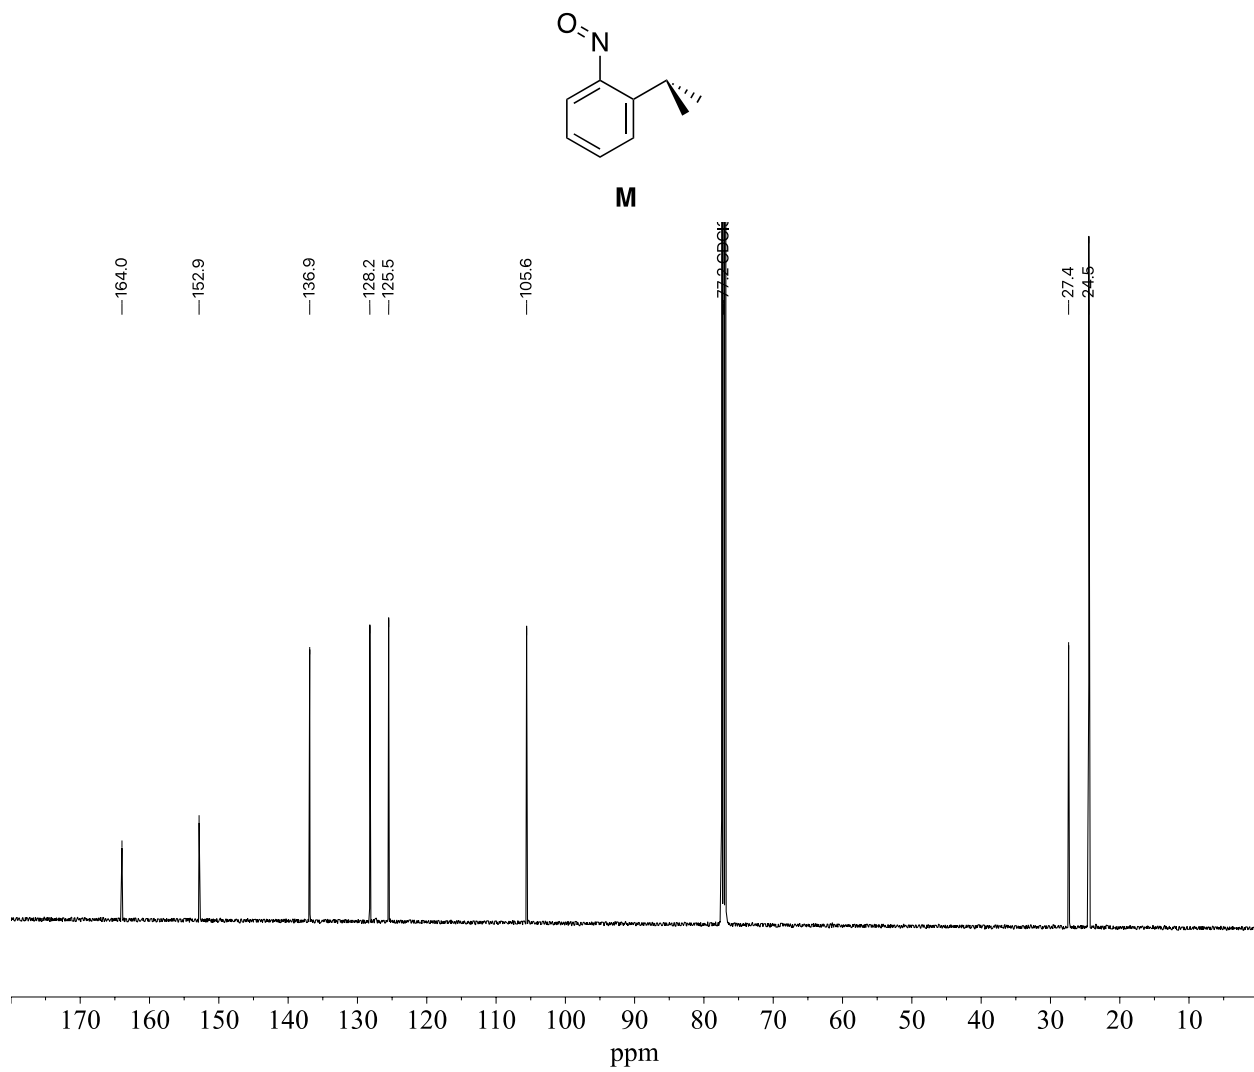

**Figure S2.**  $^{13}\text{C}$ -NMR spectrum (126 MHz) 0.0544 M *o*-NC in  $\text{CDCl}_3$



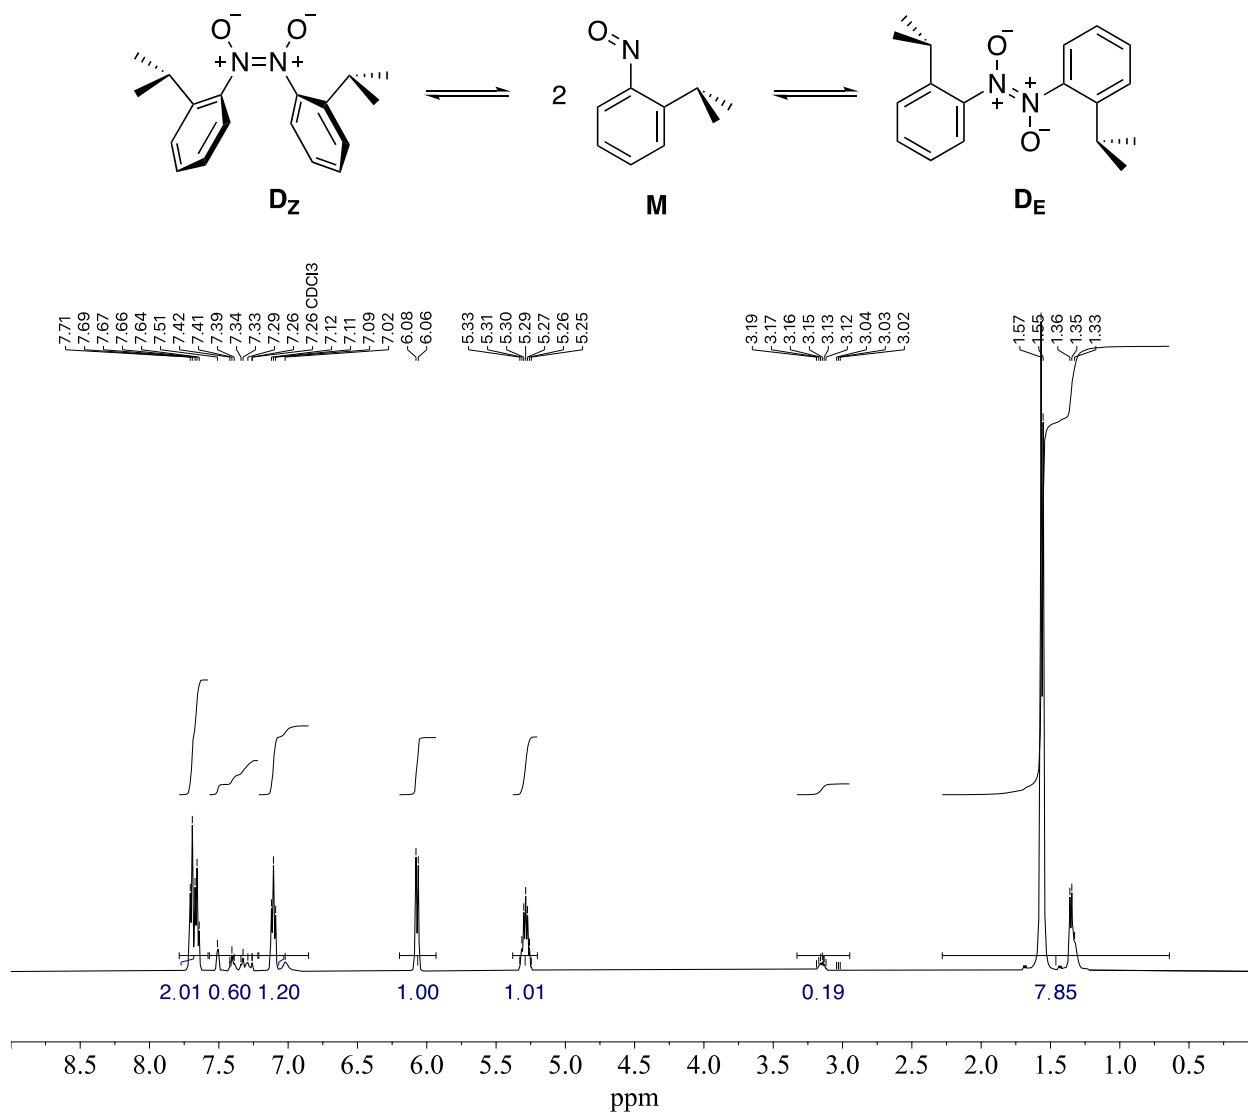

**Figure S3.**  $^1H$ -NMR spectrum (500 MHz) 0.976 M *o*-NC in  $CDCl_3$  (showing some  $D_Z$  and  $D_E$  dimer signals)

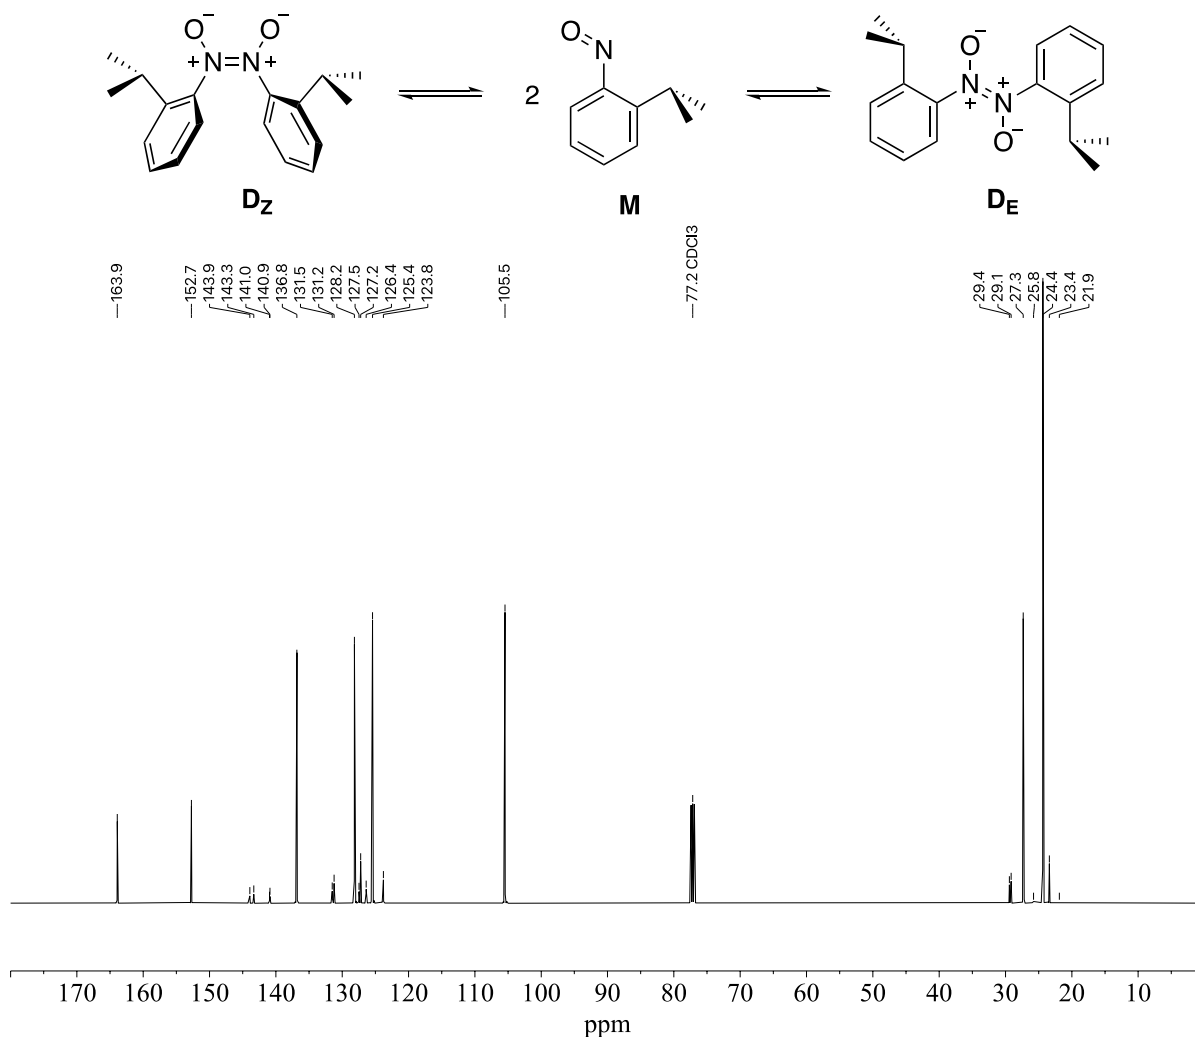

**Figure S4.**  $^{13}C$ -NMR spectrum (126 MHz) 0.976 M *o*-NC in CDCl<sub>3</sub> (showing M, D<sub>Z</sub>, and D<sub>E</sub> signals)

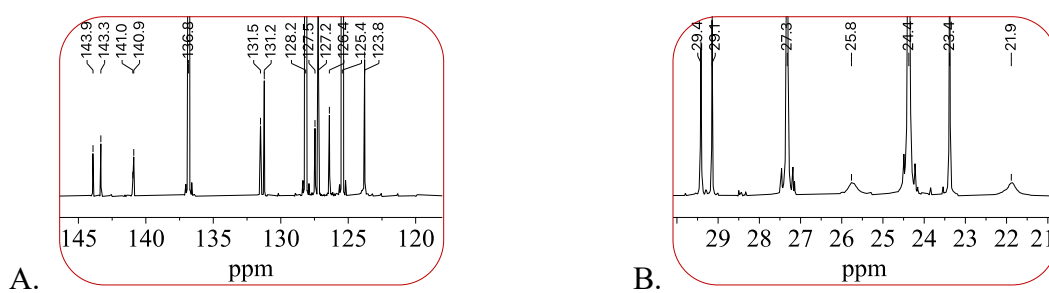

**Figure S5.**  $^{13}C$ -NMR spectra (126 MHz) 0.976 M *o*-NC in CDCl<sub>3</sub> (A) aromatic CH region and (B) isopropyl CH and CH<sub>3</sub> region

Note: the broad  $^{13}C$  signals at 21.9 and 25.8 ppm are assigned as diastereotopic methyl carbons for the D<sub>Z</sub> (anti) dimer of *o*-NC

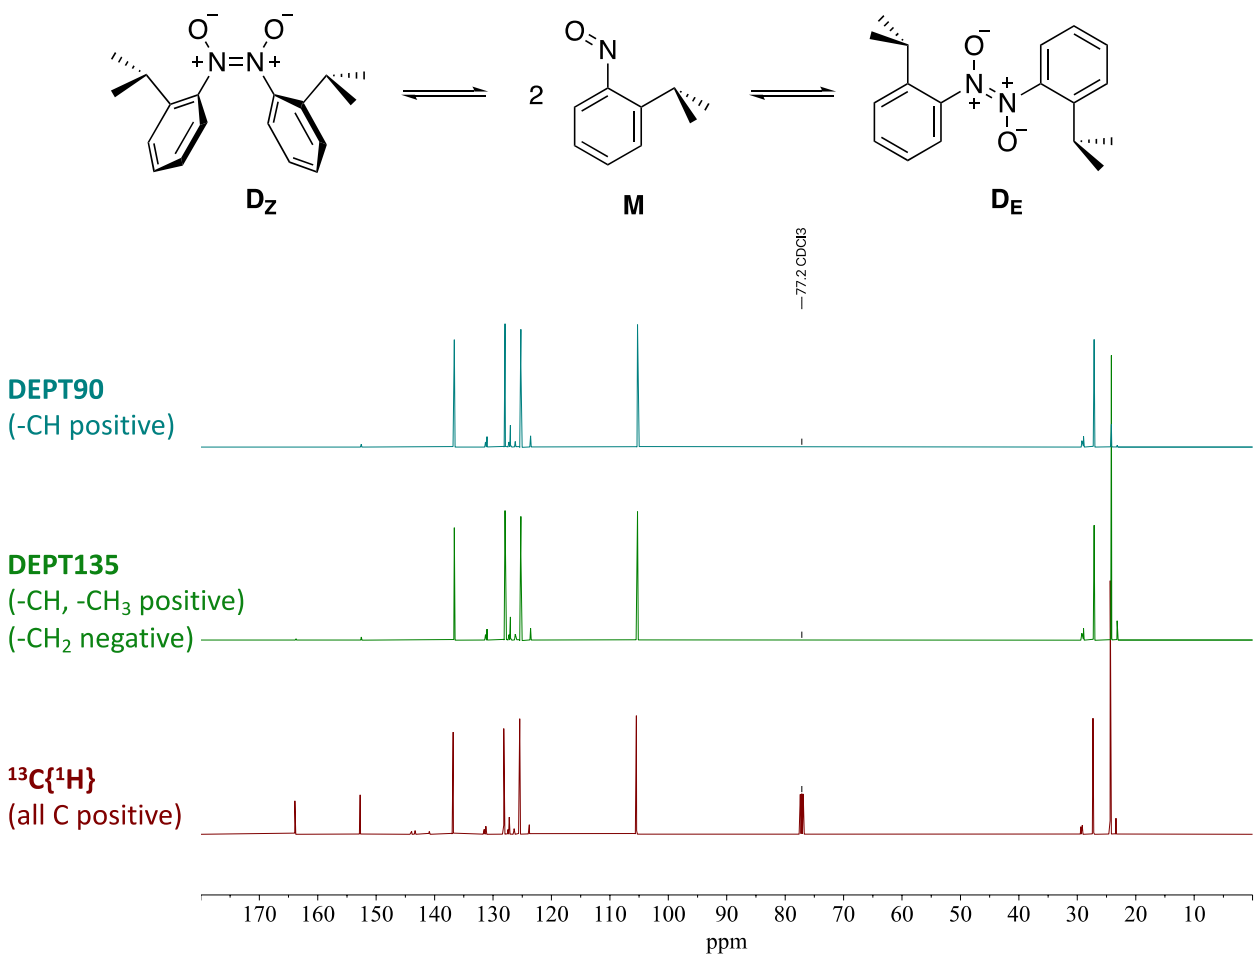

**Figure S6.** <sup>13</sup>C-NMR spectra (126 MHz) 0.976 M *o*-NC in CDCl<sub>3</sub> (maroon) <sup>13</sup>C{<sup>1</sup>H} spectrum, (green) DEPT135 spectrum, and (blue) DEPT90 spectrum

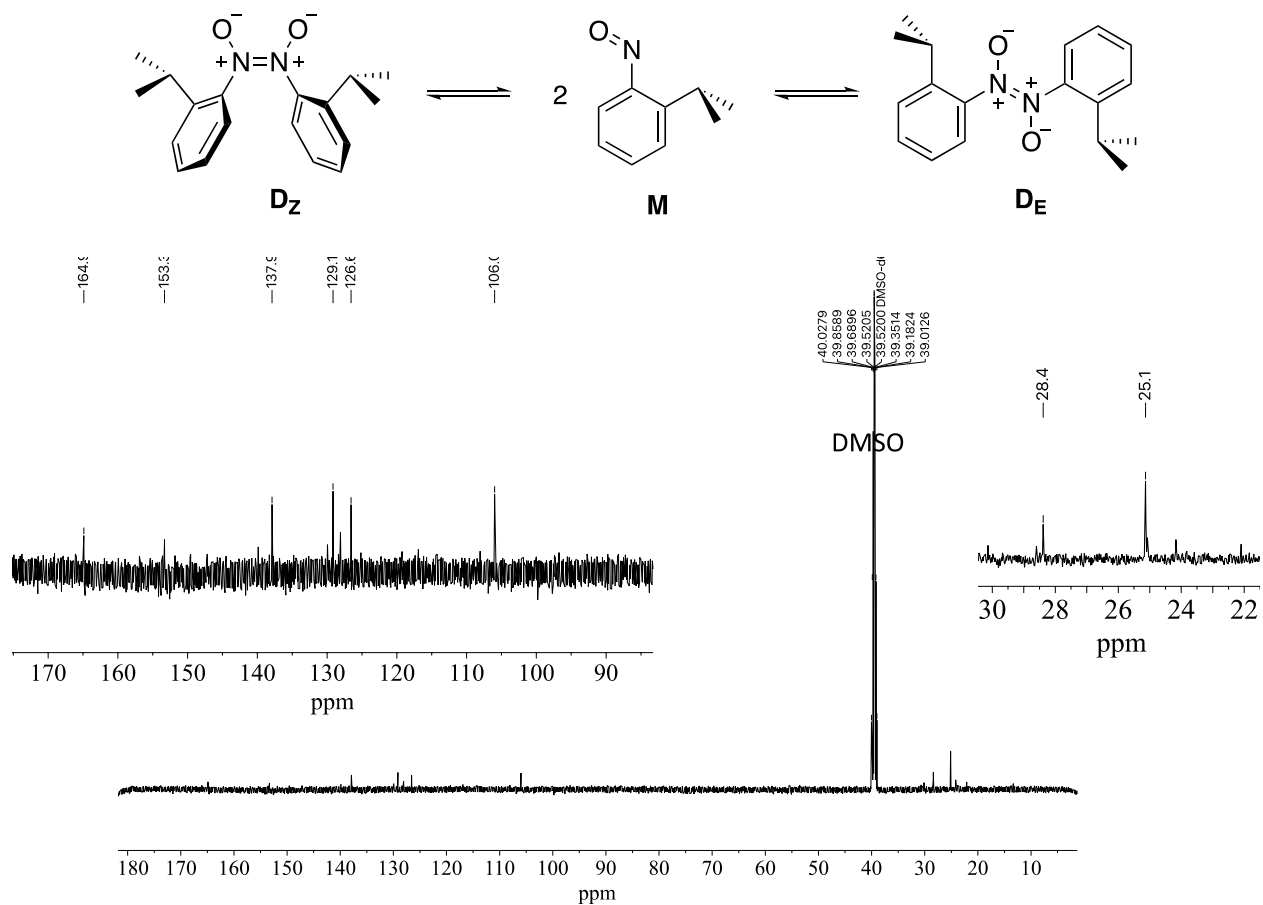

**Figure S7.**  $^{13}\text{C-NMR}$  spectrum (126 MHz) 3.8 mM *o*-NC in  $\text{D}_2\text{O}$  from ( $\text{DMSO-d}_6$  stock solution) with large amount aggregate

For  $^1\text{H-NMR}$  of *o*-NC in  $\text{D}_2\text{O}$  see manuscript, Figure 3.

### 3. X-ray crystallography of *o*-NC and cold NMR analysis of dissolved crystals in CD<sub>3</sub>OD

Single, clear, colorless crystals of *o*-NC [SCB297\_Cu\_3] were grown from a green solution of DCM upon slow cooling (-15 °C). A suitable crystal with dimensions 0.026 × 0.023 × 0.018 mm<sup>3</sup> was selected and mounted using Parabar® 10312 Immersion Oil with a MiTeGen dual thickness microloop on a Rigaku XtaLAB Synergy R, DW system, HyPix diffractometer. The crystal was kept at 117(20) K during data collection. Using Olex2,<sup>3</sup> the structure was solved with the SHELXT<sup>4</sup> structure solution program using intrinsic phasing and refined with the SHELXL<sup>5</sup> refinement package using Least Squares minimization using calculated H-atom positions. The structure has been deposited as CCDC 2313924.

---

<sup>3</sup> G. M. Sheldrick, SHELXT – Integrated Space-Group and Crystal- Structure Determination. *Acta Cryst., Sect. A* 2015, **71**, 3-8.

<sup>4</sup> O. V. Dolomanov, L. J. Bourhis, R. J. Gildea, J. A. K. Howard, H. Puschmann, OLEX2: a Complete Structure Solution, Refinement and Analysis Program. *J. Appl. Cryst.* 2009, **42**, 339-3416.

<sup>5</sup> G. M. Sheldrick, Crystal Structure Refinement with ShelXL. *Acta Crystallogr., Sect. C: Cryst. Struct. Commun.* 2015, **71**, 3-8.

**Table S1.** Crystal data and structure refinement for *o*-NC D<sub>Z</sub> (anti) SCB297\_Cu\_3.

|                                             |                                                               |
|---------------------------------------------|---------------------------------------------------------------|
| Identification code                         | SCB297_Cu_3                                                   |
| Empirical formula                           | C <sub>18</sub> H <sub>22</sub> N <sub>2</sub> O <sub>2</sub> |
| Formula weight                              | 298.37                                                        |
| Temperature/K                               | 117(20)                                                       |
| Crystal system                              | monoclinic                                                    |
| Space group                                 | P2 <sub>1</sub> /n                                            |
| a/Å                                         | 12.7459(4)                                                    |
| b/Å                                         | 10.4541(3)                                                    |
| c/Å                                         | 13.4750(4)                                                    |
| α/°                                         | 90                                                            |
| β/°                                         | 111.592(4)                                                    |
| γ/°                                         | 90                                                            |
| Volume/Å <sup>3</sup>                       | 1669.51(10)                                                   |
| Z                                           | 4                                                             |
| ρ <sub>calc</sub> /g/cm <sup>3</sup>        | 1.187                                                         |
| μ/mm <sup>-1</sup>                          | 0.620                                                         |
| F(000)                                      | 640.0                                                         |
| Crystal size/mm <sup>3</sup>                | 0.026 × 0.023 × 0.018                                         |
| Radiation                                   | Cu Kα (λ = 1.54184)                                           |
| 2θ range for data collection/°              | 8.168 to 142.534                                              |
| Index ranges                                | -9 ≤ h ≤ 15, -11 ≤ k ≤ 12, -16 ≤ l ≤ 15                       |
| Reflections collected                       | 7988                                                          |
| Independent reflections                     | 3150 [R <sub>int</sub> = 0.0364, R <sub>sigma</sub> = 0.0444] |
| Data/restraints/parameters                  | 3150/0/203                                                    |
| Goodness-of-fit on F <sup>2</sup>           | 1.041                                                         |
| Final R indexes [I ≥ 2σ (I)]                | R <sub>1</sub> = 0.0465, wR <sub>2</sub> = 0.1133             |
| Final R indexes [all data]                  | R <sub>1</sub> = 0.0572, wR <sub>2</sub> = 0.1192             |
| Largest diff. peak/hole / e Å <sup>-3</sup> | 0.20/-0.20                                                    |

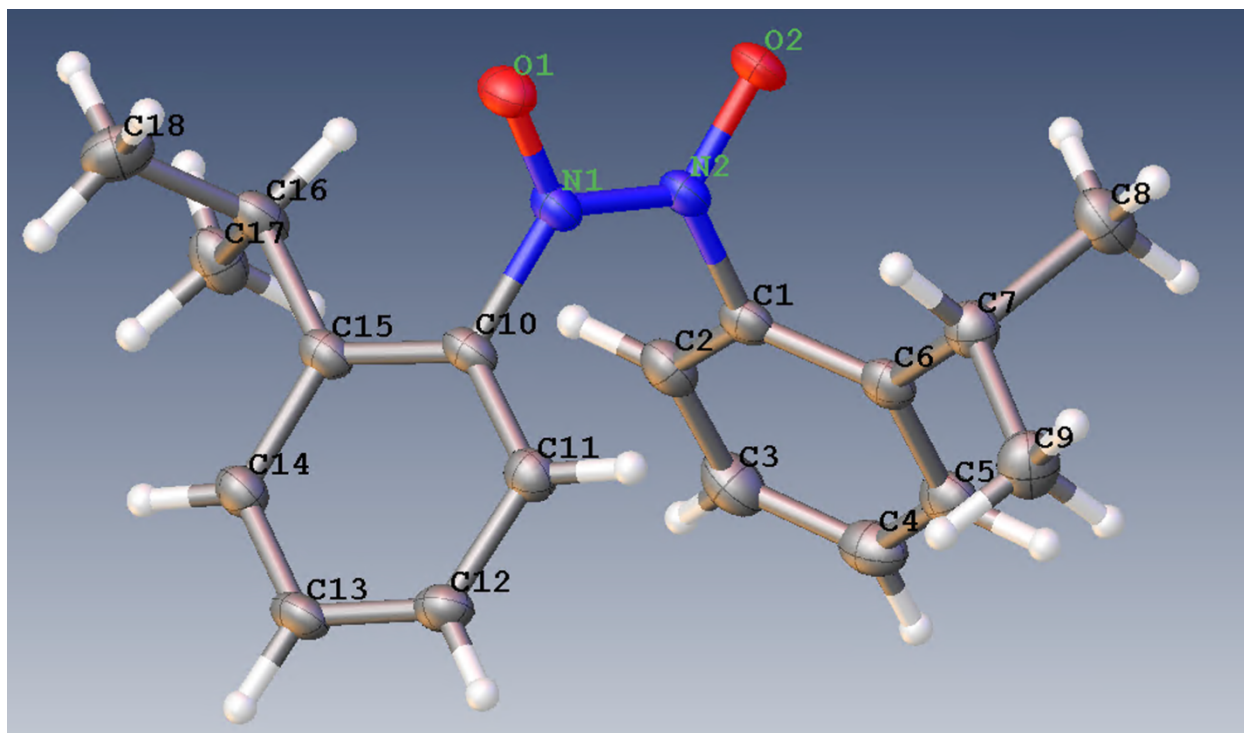

**Figure S8.** Crystal structure of *o*-NC  $D_z$  (anti)

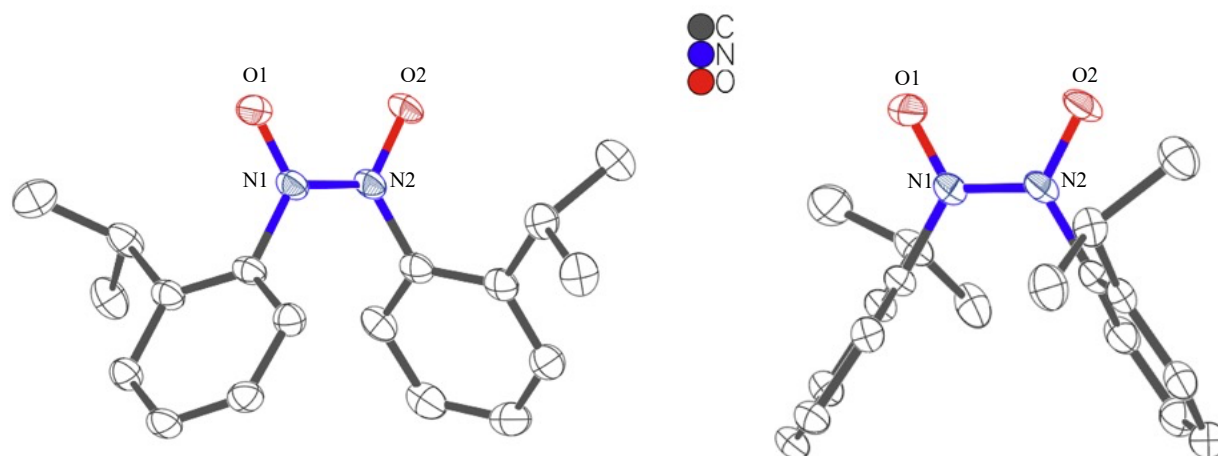

**Figure S9.** ORTEP (50% thermal ellipsoids) diagram of *o*-NC  $D_z$  (anti) with heteroatoms labelled and hydrogen atoms omitted for clarity.

**Table S2.** Bond Lengths

| Atom | Atom | Length/Å   | Atom | Atom | Length/Å |
|------|------|------------|------|------|----------|
| O1   | N1   | 1.2602(17) | C12  | C13  | 1.382(2) |
| O2   | N2   | 1.2668(16) | C14  | C13  | 1.388(2) |
| N2   | N1   | 1.3241(18) | C6   | C7   | 1.521(2) |
| N2   | C1   | 1.451(2)   | C6   | C5   | 1.395(2) |
| N1   | C10  | 1.4582(19) | C7   | C9   | 1.526(2) |
| C15  | C10  | 1.389(2)   | C7   | C8   | 1.532(2) |
| C15  | C14  | 1.402(2)   | C16  | C17  | 1.531(2) |
| C15  | C16  | 1.517(2)   | C16  | C18  | 1.530(3) |
| C1   | C6   | 1.394(2)   | C2   | C3   | 1.387(3) |
| C1   | C2   | 1.388(2)   | C5   | C4   | 1.388(3) |
| C10  | C11  | 1.392(2)   | C3   | C4   | 1.380(3) |
| C11  | C12  | 1.383(2)   |      |      |          |

**Table S3.** Bond Angles

| Atom | Atom | Atom | Angle/°    | Atom | Atom | Atom | Angle/°    |
|------|------|------|------------|------|------|------|------------|
| O2   | N2   | N1   | 119.02(13) | C13  | C12  | C11  | 119.54(15) |
| O2   | N2   | C1   | 119.31(12) | C13  | C14  | C15  | 121.15(15) |
| N1   | N2   | C1   | 121.63(12) | C1   | C6   | C7   | 122.45(15) |
| O1   | N1   | N2   | 119.26(12) | C1   | C6   | C5   | 115.86(15) |
| O1   | N1   | C10  | 120.00(12) | C5   | C6   | C7   | 121.69(15) |
| N2   | N1   | C10  | 120.73(13) | C12  | C13  | C14  | 121.01(15) |
| C10  | C15  | C14  | 116.00(15) | C6   | C7   | C9   | 111.93(14) |
| C10  | C15  | C16  | 123.23(14) | C6   | C7   | C8   | 110.92(13) |
| C14  | C15  | C16  | 120.77(15) | C9   | C7   | C8   | 110.97(15) |
| C6   | C1   | N2   | 117.82(14) | C15  | C16  | C17  | 111.93(14) |
| C2   | C1   | N2   | 118.53(15) | C15  | C16  | C18  | 110.52(13) |
| C2   | C1   | C6   | 123.44(15) | C18  | C16  | C17  | 110.02(15) |
| C15  | C10  | N1   | 118.20(14) | C3   | C2   | C1   | 118.81(17) |
| C15  | C10  | C11  | 123.74(14) | C4   | C5   | C6   | 121.80(17) |
| C11  | C10  | N1   | 117.87(14) | C4   | C3   | C2   | 119.47(16) |
| C12  | C11  | C10  | 118.54(15) | C3   | C4   | C5   | 120.61(17) |



**Table S4.** Torsional Angles

| A   | B   | C   | D   | Angle/°     | A   | B   | C   | D   | Angle/°     |
|-----|-----|-----|-----|-------------|-----|-----|-----|-----|-------------|
| O1  | N1  | C10 | C15 | 67.36(18)   | C1  | C2  | C3  | C4  | -0.7(2)     |
| O1  | N1  | C10 | C11 | -107.75(17) | C10 | C15 | C14 | C13 | 1.1(2)      |
| O2  | N2  | N1  | O1  | 1.9(2)      | C10 | C15 | C16 | C17 | 123.19(16)  |
| O2  | N2  | N1  | C10 | -179.02(13) | C10 | C15 | C16 | C18 | -113.81(17) |
| O2  | N2  | C1  | C6  | 63.75(18)   | C10 | C11 | C12 | C13 | 0.5(2)      |
| O2  | N2  | C1  | C2  | -111.26(16) | C11 | C12 | C13 | C14 | 0.4(2)      |
| N2  | N1  | C10 | C15 | -111.71(17) | C14 | C15 | C10 | N1  | -175.02(13) |
| N2  | N1  | C10 | C11 | 73.18(19)   | C14 | C15 | C10 | C11 | -0.2(2)     |
| N2  | C1  | C6  | C7  | 4.3(2)      | C14 | C15 | C16 | C17 | -57.3(2)    |
| N2  | C1  | C6  | C5  | -175.14(13) | C14 | C15 | C16 | C18 | 65.7(2)     |
| N2  | C1  | C2  | C3  | 175.50(14)  | C6  | C1  | C2  | C3  | 0.8(2)      |
| N1  | N2  | C1  | C6  | -114.07(16) | C6  | C5  | C4  | C3  | 0.1(3)      |
| N1  | N2  | C1  | C2  | 70.93(19)   | C7  | C6  | C5  | C4  | -179.53(15) |
| N1  | C10 | C11 | C12 | 174.28(14)  | C16 | C15 | C10 | N1  | 4.5(2)      |
| C15 | C10 | C11 | C12 | -0.5(2)     | C16 | C15 | C10 | C11 | 179.27(15)  |
| C15 | C14 | C13 | C12 | -1.2(2)     | C16 | C15 | C14 | C13 | -178.44(15) |
| C1  | N2  | N1  | O1  | 179.72(13)  | C2  | C1  | C6  | C7  | 179.07(14)  |
| C1  | N2  | N1  | C10 | -1.2(2)     | C2  | C1  | C6  | C5  | -0.4(2)     |
| C1  | C6  | C7  | C9  | 133.36(16)  | C2  | C3  | C4  | C5  | 0.3(3)      |
| C1  | C6  | C7  | C8  | -102.09(18) | C5  | C6  | C7  | C9  | -47.2(2)    |
| C1  | C6  | C5  | C4  | -0.1(2) C   | 5   | C6  | C7  | C8  | 77.33(19)   |

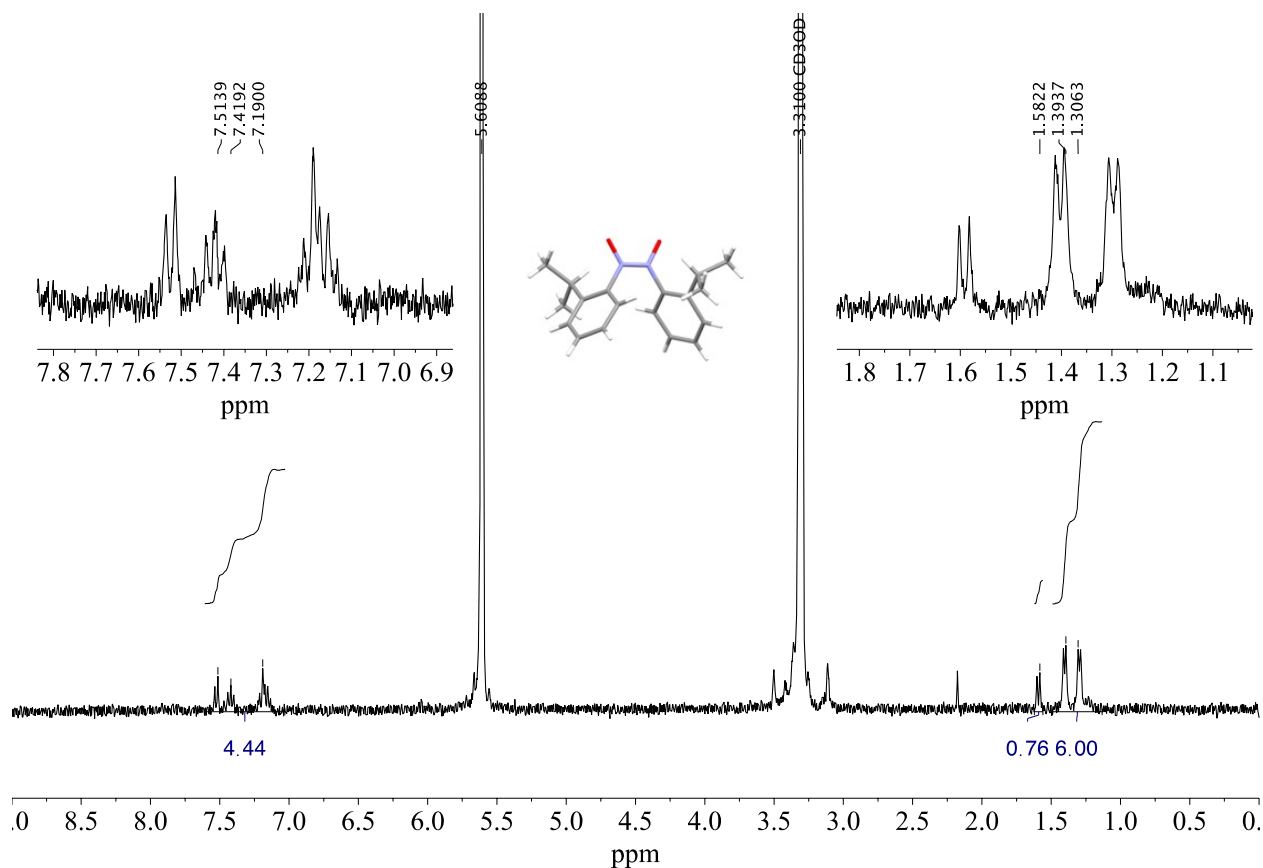

**Figure S10.**  $^1\text{H-NMR}$  spectrum (360 MHz,  $\text{CD}_3\text{OD}$ )  $\text{D}_Z$  (anti) crystal dissolved at  $-68.0\text{ }^\circ\text{C}$  in precooled  $\text{CD}_3\text{OD}$  (used to fully assign  $\text{D}_Z$  (anti) signals in solution)

Note: the small doublet at  $\sim 1.60$  ppm is due to a small amount of monomerization that occurred during  $o\text{-NC}$  addition to cold  $\text{CD}_3\text{OD}$ . At  $-68.0\text{ }^\circ\text{C}$ , the equilibrium of this monomer with the bulk  $\text{D}_Z$  (anti) is slow.

#### 4. EXSY $^1\text{H-NMR}$ spectrum of *o*-NC in $\text{CDCl}_3$ and M, $\text{D}_Z$ , and $\text{D}_E$ signal assignments

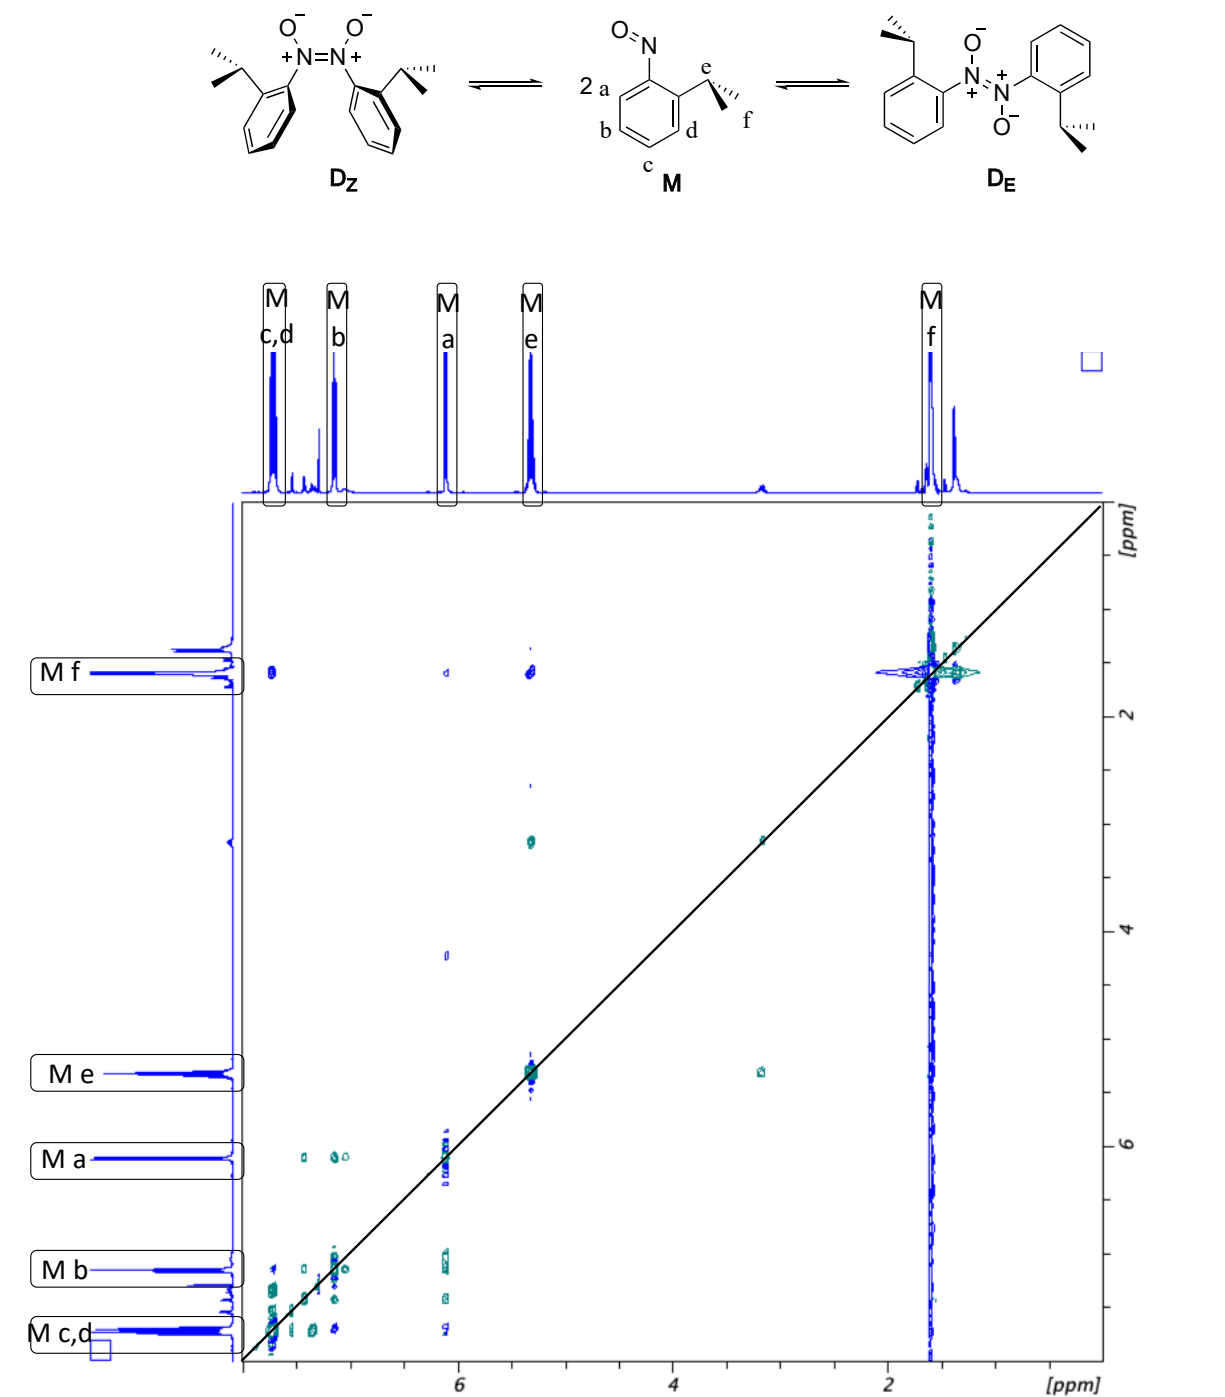

**Figure S11.** 2D EXSY  $^1\text{H-NMR}$  spectrum (500 MHz) 0.349 M *o*-NC in  $\text{CDCl}_3$  full spectrum.

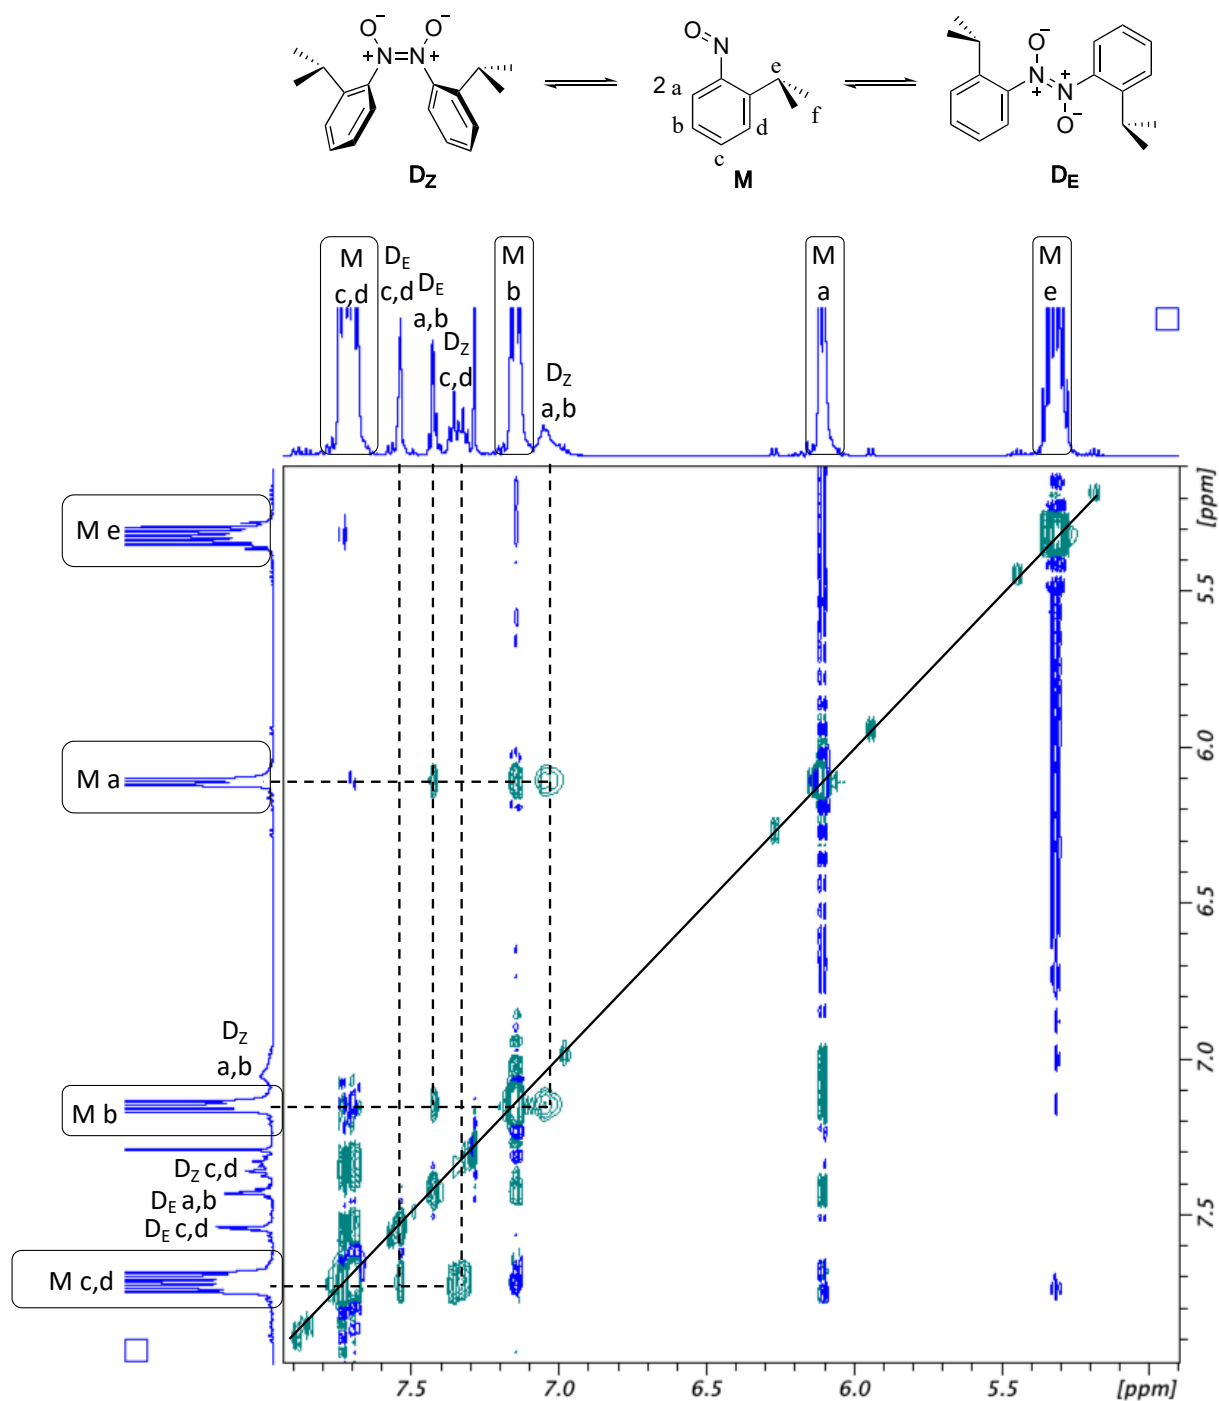

**Figure S12.** 2D EXSY  $^1\text{H-NMR}$  spectrum (500 MHz) 0.349 M *o*-NC in  $\text{CDCl}_3$  methine region. Based on these EXSY exchange peaks,  $\text{D}_Z$  and  $\text{D}_E$  a,b and c,d dimer signals are confirmed by exchange with the known signals of  $\text{M}$  (as indicated by dashed lines).

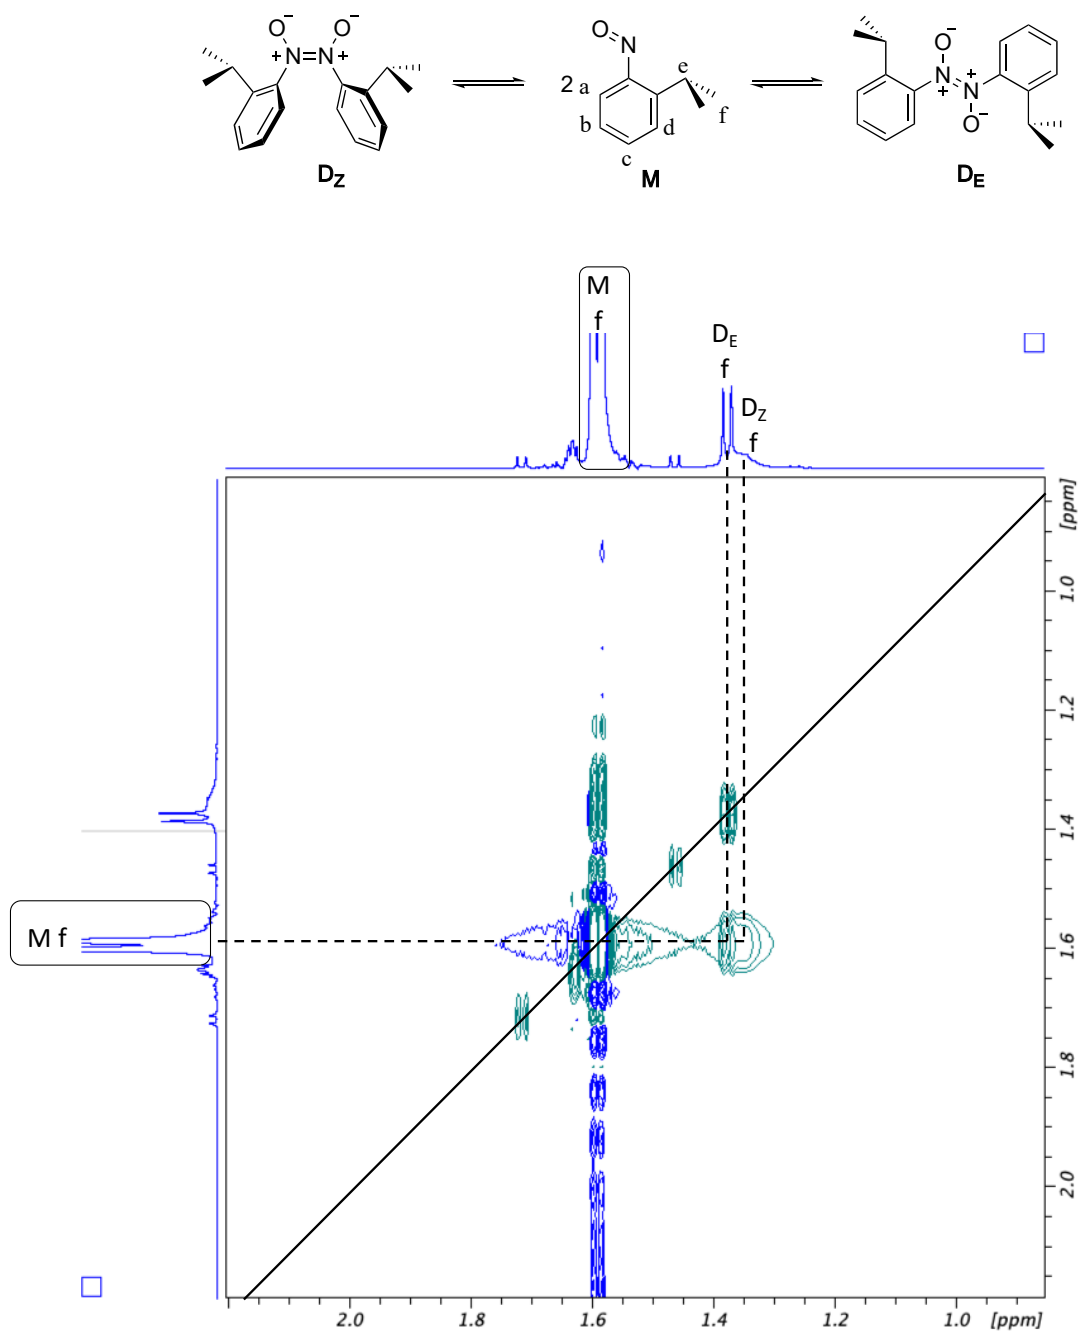

**Figure S13.** 2D EXSY  $^1\text{H}$ -NMR spectrum ( $\text{CDCl}_3$ , 500 MHz) 0.349 M *o*-NC in  $\text{CDCl}_3$  methyl region. Based on these EXSY exchange peaks,  $D_Z$  and  $D_E$  a,b and c,d dimer signals are confirmed by exchange with the known signals of  $M$  (as indicated by dashed lines).

**5. VT-NMR analysis for monomer and dimer distributions of *o*-NC in CDCl<sub>3</sub>, (CD<sub>3</sub>)<sub>2</sub>CO, CD<sub>3</sub>OD, CD<sub>3</sub>CN, and D<sub>2</sub>O**

**Figure S14.** VT <sup>1</sup>H-NMR spectra (500 MHz) of 0.363 M *o*-NC in CDCl<sub>3</sub> (Run 3). For full signal assignment, see Figures S11-13.

- Within the red box region is the **M** ‘c,d’ signal which was integrated and used directly to quantify **M**.
- Within the green box region are the **D<sub>E</sub>** the ‘c,d’ protons which were integrated and used directly to quantify **D<sub>E</sub>**.
- Within the blue box region are the **D<sub>Z</sub>** the ‘a,b’ protons which were integrated and used directly to quantify **D<sub>Z</sub>**.

**Table S5.** A) M and D signal integrations (Figure S14) of *o*-NC (VT-NMR) B) M and D concentrations of *o*-NC in CDCl<sub>3</sub> (Run 3).

**Figure S15.** Van't Hoff Plot for *o*-NC monomerization ( $D \rightleftharpoons 2M$ ) in CDCl<sub>3</sub>

**Table S6.** Summary of VT-NMR data for *o*-NC monomerization in CDCl<sub>3</sub>

\* used in manuscript



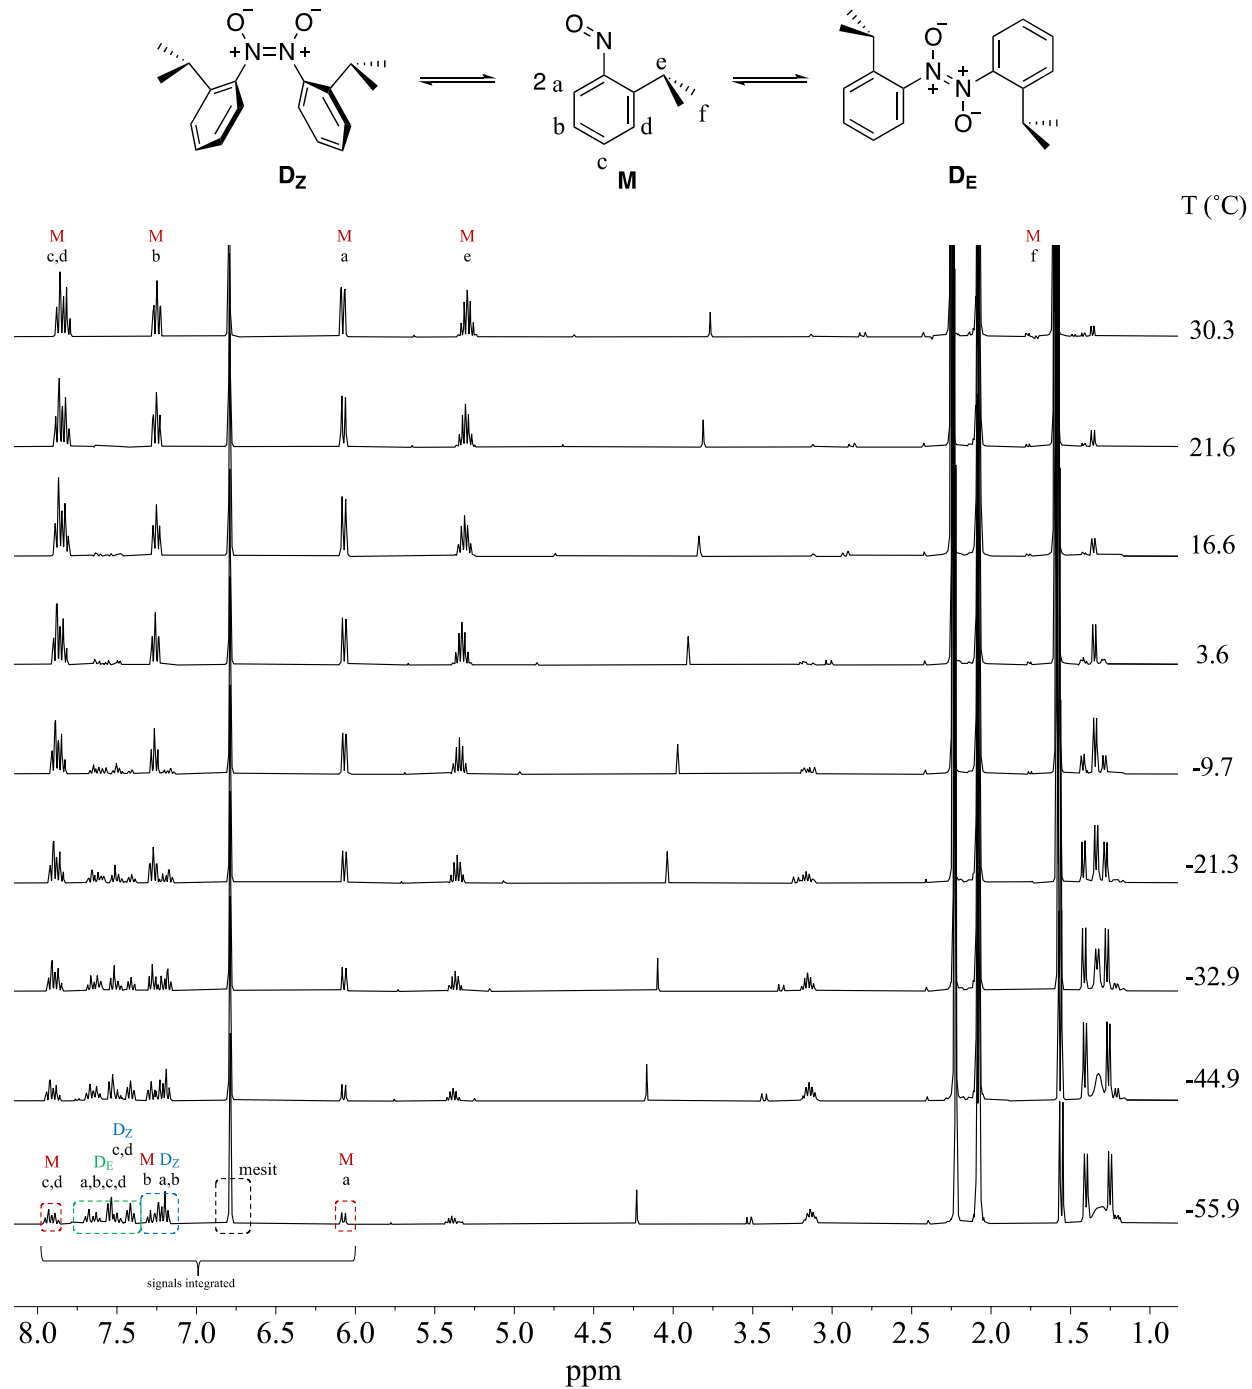

**Figure S16.** VT  $^1H$ -NMR spectra (500 MHz) of 0.275 M *o*-NC in  $(CD_3)_2CO$  (Run 3). For full signal assignment, see Figures S11-13.

- Within the red box region are the  $M$  'c,d' signals which were integrated and used directly to quantify  $M$ .

- Within the blue box region are the  $D_Z$  'a,b' signals and the  $M$  'b' signal. The  $D_Z$  'a,b' integration value was obtained subtracting the analogous value of the  $M$  'a' signal integration (red box region labelled 'a').
- Within the green box region are the  $D_E$  'a,b,c,d' signals and the  $D_Z$  'c,d' signals. The  $D_E$  'a,b,c,d' integration value was obtained subtracting the determined integration value of  $D_Z$  'a,b' signals (second bullet point).

**Table S7.** A) M and D signal integrations (Figure S16) of *o*-NC (VT-NMR) B) M and D concentrations of *o*-NC in (CD<sub>3</sub>)<sub>2</sub>CO (Run 3).

**Figure S17.** Van't Hoff Plot for *o*-NC monomerization ( $D \rightleftharpoons 2M$ ) in (CD<sub>3</sub>)<sub>2</sub>CO (Run 3).

**Table S8.** Summary of VT-NMR data in  $(\text{CD}_3)_2\text{CO}$

\* used in manuscript

**Figure S18.** VT-<sup>1</sup>H NMR spectra (500 MHz) of 0.190 M *o*-NC in CD<sub>3</sub>OD (Run 3). For full signal assignment, see Figures S11-13.

- Within the red box region are the **M** 'c,d' signals which were integrated and used directly to quantify **M**.
- Within the blue box region are the **D<sub>Z</sub>** 'a,b' signals and the **M** 'b' signal. The **D<sub>Z</sub>** 'a,b' integration value was obtained subtracting the analogous value of the **M** 'a' signal integration (red box region labelled 'a').
- Within the green box region are the **D<sub>E</sub>** 'a,b,c,d' signals and the **D<sub>Z</sub>** 'c,d' signals. The **D<sub>E</sub>** 'a,b,c,d' integration value was obtained subtracting the determined integration value of **D<sub>Z</sub>** 'a,b' signals (second bullet point).

**Table S9.** A) M and D signal integrations (Figure S18) of *o*-NC (VT-NMR) B) M and D concentrations of *o*-NC in CD<sub>3</sub>OD (Run 3).

**Figure S19.** Van't Hoff Plot for *o*-NC monomerization ( $D \rightleftharpoons 2M$ ) in CD<sub>3</sub>OD (Run 1).

**Table S10.** Summary of VT-NMR data in CD<sub>3</sub>OD

\* used in manuscript

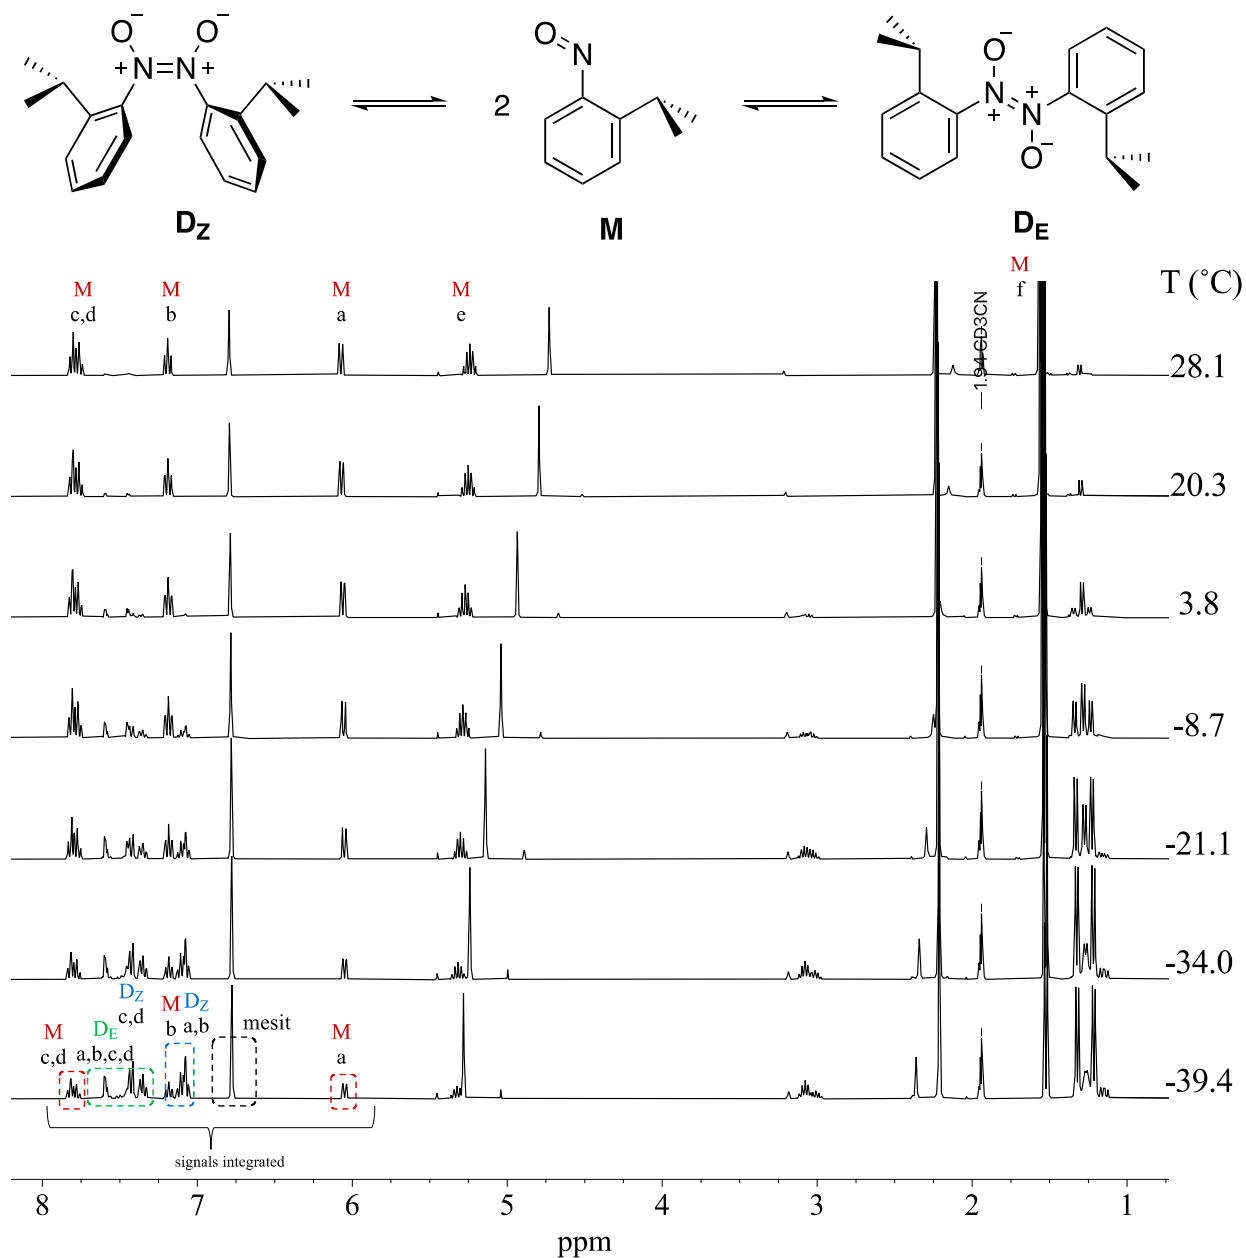

**Figure S20.** VT- $^1\text{H}$  NMR spectra (500 MHz) of 0.109 M *o*-NC in  $\text{CD}_3\text{CN}$  (Run 2). For full signal assignment, see Figures S11-13.

- Within the red box region are the  $M$  'c,d' signals which were integrated and used directly to quantify  $M$ .
- Within the blue box region are the  $D_Z$  'a,b' signals and the  $M$  'b' signal. The  $D_Z$  'a,b' integration value was obtained subtracting the analogous value of the  $M$  'a' signal integration (red box region labelled 'a').
- Within the green box region are the  $D_E$  'a,b,c,d' signals and the  $D_Z$  'c,d' signals. The  $D_E$  'a,b,c,d' integration value was obtained subtracting the determined integration value of  $D_Z$  'a,b' signals (second bullet point).



**Table S11.** A) M and D signal integrations (Figure S20) of *o*-NC (VT-NMR) B) M and D concentrations of *o*-NC in CD<sub>3</sub>CN (Run 2).

**Figure S21.** Van't Hoff Plot for *o*-NC monomerization ( $D \rightleftharpoons 2M$ ) in CD<sub>3</sub>CN (Run 2).

**Table S12.** Summary of VT-NMR data in CD<sub>3</sub>CN data

\* used in manuscript

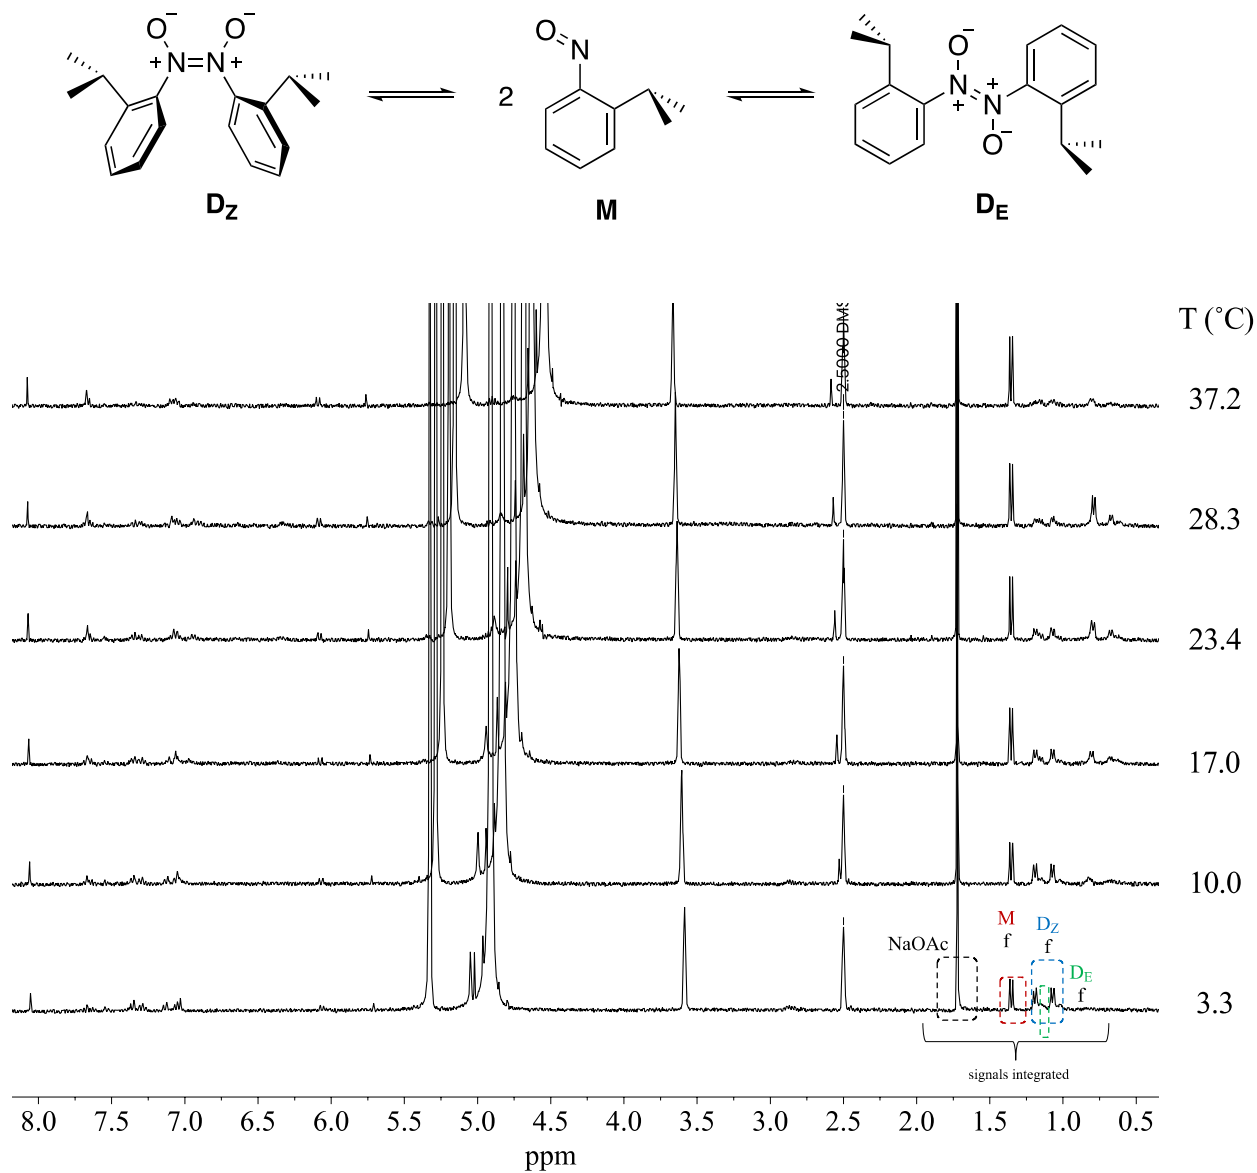

**Figure S22.** VT- $^1\text{H}$  NMR spectra (500 MHz) of 0.546 mM *o*-NC in  $\text{D}_2\text{O}$  (Run 1). For full signal assignment, see Figures S11-13.

- For directly quantifying **M**, the 'f' proton was integrated
- For indirectly quantifying  $D_Z$  &  $D_E$ , the 'f' region of both was integrated and manual heights were analyzed for changes in inflection of the integral above  $D_E$  allowing it to be determined and ultimately subtracted from the total dimer integral

**Table S13.** A) M and D distribution in D<sub>2</sub>O based on the integration of the methyl NMR signals of *o*-NC (VT-NMR). B) M and D distribution of *o*-NC in D<sub>2</sub>O (VT-NMR) by concentration.

A

| Run 1         | Integration Data (methyl-H) |                |                |       | M:D Ratio (adjusted for #H) |                |                |
|---------------|-----------------------------|----------------|----------------|-------|-----------------------------|----------------|----------------|
| T Correct (K) | M                           | D <sub>E</sub> | D <sub>Z</sub> | NaOAc | M                           | D <sub>E</sub> | D <sub>Z</sub> |
| 301           | 38.52                       | 7.31           | 29.23          | 100   | 68%                         | 6%             | 26%            |
| 297           | 35.27                       | 7.88           | 33.57          | 100   | 63%                         | 7%             | 30%            |
| 290           | 29.64                       | 7.92           | 38.67          | 100   | 56%                         | 7%             | 37%            |
| 283           | 26.03                       | 8.62           | 48.82          | 100   | 48%                         | 8%             | 45%            |
| 276           | 20.94                       | 9.77           | 55.39          | 100   | 39%                         | 9%             | 52%            |
| 310 (warmup)  | 43.38                       | 6.27           | 16.94          | 100   | 79%                         | 6%             | 15%            |

B

| Run 1         | Concentrations (M) |                   |                   |          |                                    |                                    |
|---------------|--------------------|-------------------|-------------------|----------|------------------------------------|------------------------------------|
| T Correct (K) | [M]                | [D <sub>Z</sub> ] | [D <sub>E</sub> ] | [NaOAc]  | K <sub>m</sub> D <sub>Z</sub> ⇌ 2M | K <sub>m</sub> D <sub>E</sub> ⇌ 2M |
| 301           | 3.79E-04           | 3.59E-05          | 1.44E-04          | 1.97E-03 | 3.79E-04                           | 3.59E-05                           |
| 297           | 3.47E-04           | 3.87E-05          | 1.65E-04          | 1.97E-03 | 3.47E-04                           | 3.87E-05                           |
| 290           | 2.91E-04           | 3.89E-05          | 1.90E-04          | 1.97E-03 | 2.91E-04                           | 3.89E-05                           |
| 283           | 2.56E-04           | 4.24E-05          | 2.40E-04          | 1.97E-03 | 2.56E-04                           | 4.24E-05                           |
| 276           | 2.06E-04           | 4.80E-05          | 2.72E-04          | 1.97E-03 | 2.06E-04                           | 4.80E-05                           |
| 310 (warmup)  | 4.26E-04           | 3.08E-05          | 8.33E-05          | 1.97E-03 | 4.26E-04                           | 3.08E-05                           |

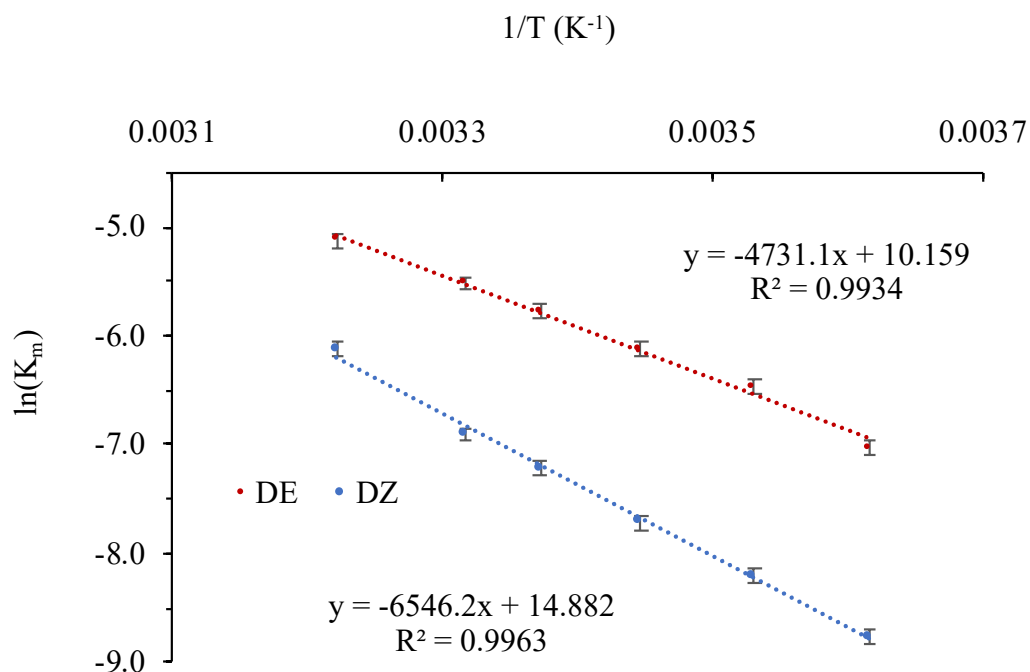

**Figure S23.** Van't Hoff Plots for *o*-NC monomerization (D ⇌ 2M) in D<sub>2</sub>O (Run 1).

**Table S14.** Summary of VT-NMR data in D<sub>2</sub>O

| D <sub>2</sub> O<br>(80) |                | [total <i>o</i> -NC] | $\Delta H^\circ$<br>(kJ/mol) | $\Delta S^\circ$<br>(J/mol*k) | $\Delta G^\circ$ 298 K<br>(kJ/mol) | $K_m$ 298 K<br>(M)   | $\Delta T$<br>(°C) |
|--------------------------|----------------|----------------------|------------------------------|-------------------------------|------------------------------------|----------------------|--------------------|
| Run 1*                   | D <sub>Z</sub> | 0.546 mM             | 54.4 ± 1.7                   | 124 ± 6                       | 17.4 ± 0.1                         | 0.00088 ±<br>0.00003 | 3.33 – 37.2        |
|                          | D <sub>E</sub> |                      | 39.3 ± 1.6                   | 84 ± 5                        | 14.3 ± 0.1                         | 0.0032 ±<br>0.0001   |                    |
| Run 2                    | D <sub>Z</sub> | 0.586 mM             | 58.2 ± 4.7                   | 140 ± 16                      | 16.5                               | 0.00131              | 2.77 - 25.8        |
|                          | D <sub>E</sub> |                      | 46.8 ± 3.7                   | 113 ± 13                      | 13.1                               | 0.00508              |                    |
| Average                  | D <sub>Z</sub> | 0.586 mM             | 56.3 ± 3.2                   | 132 ± 11                      | 17.0                               | 0.00108              | 2.77 – 37.2        |
|                          | D <sub>E</sub> |                      | 43.1 ± 2.7                   | 98.5 ± 9                      | 13.7                               | 0.00408              |                    |

\* used in manuscript

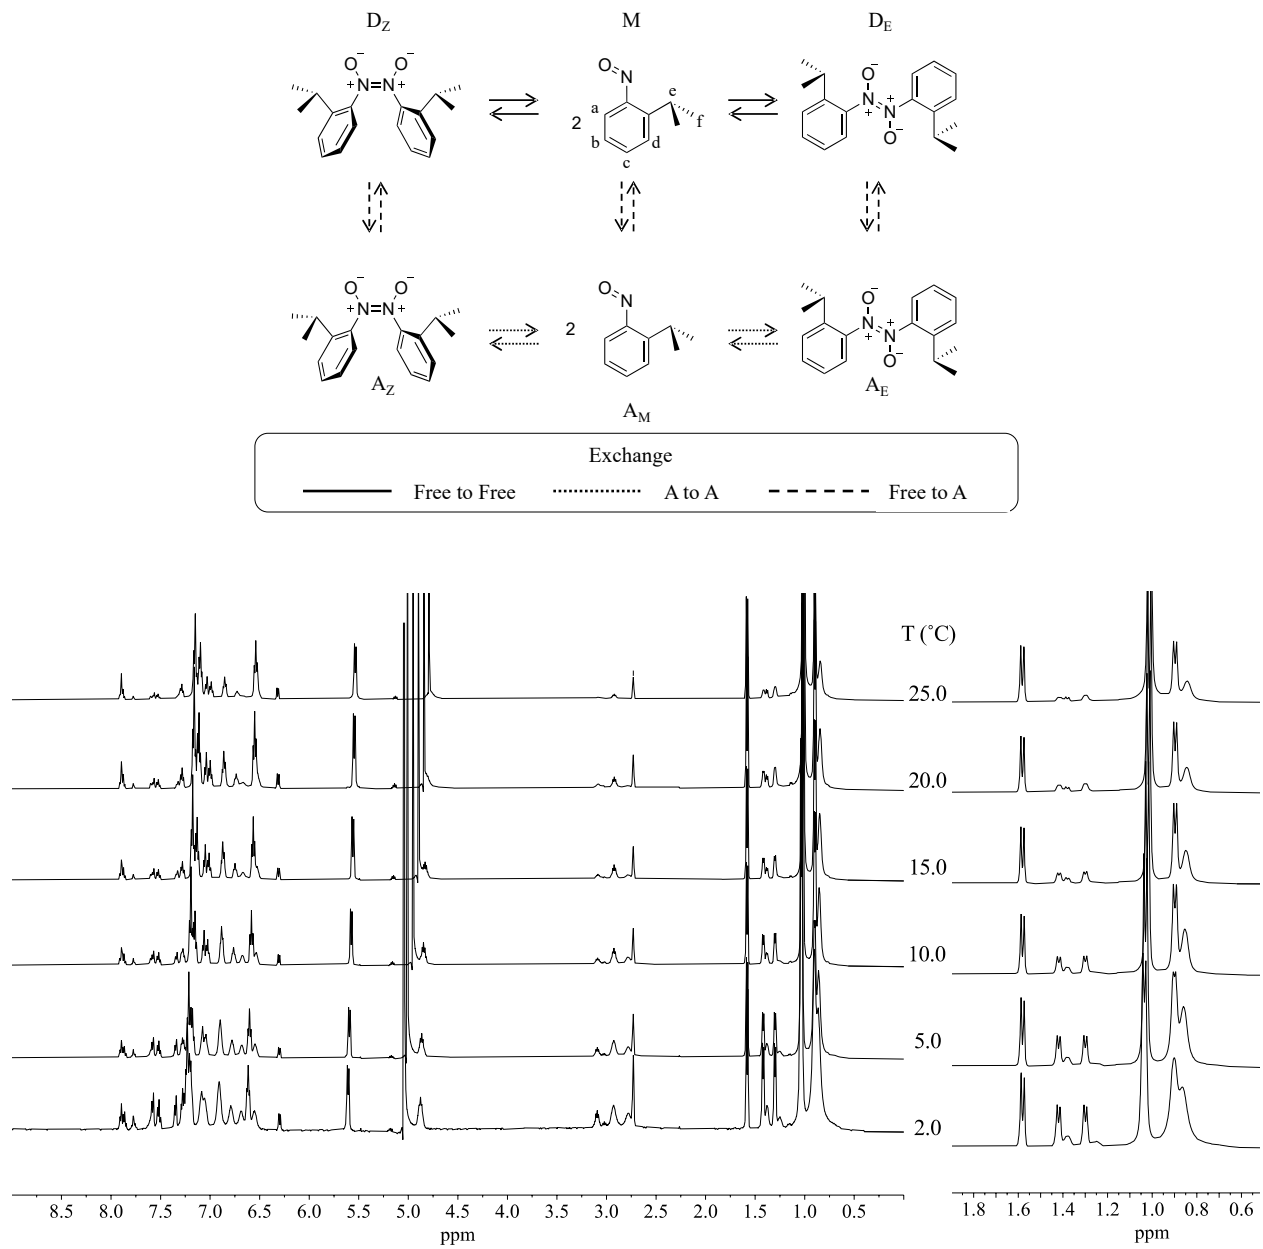

**Figure S24.** Higher resolution, VT <sup>1</sup>H-NMR spectra (500 MHz) of ~5.0 mM *o*-NC in D<sub>2</sub>O (approximate temperatures).

6.  $^1\text{H-NMR}$  of *o*-NC aggregate formation in  $\text{D}_2\text{O}$  at variable concentrations and times

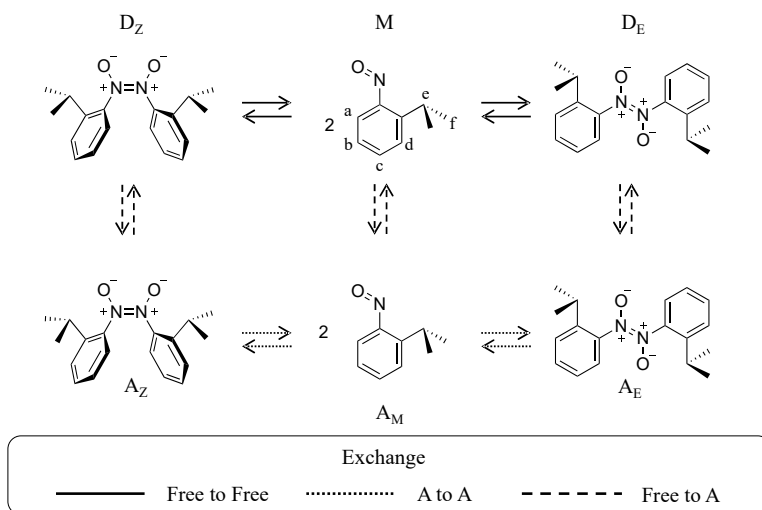

**Figure S25.** Concentration (mM) dependence of *o*-NC in  $\text{D}_2\text{O}$  by  $^1\text{H-NMR}$  spectroscopy

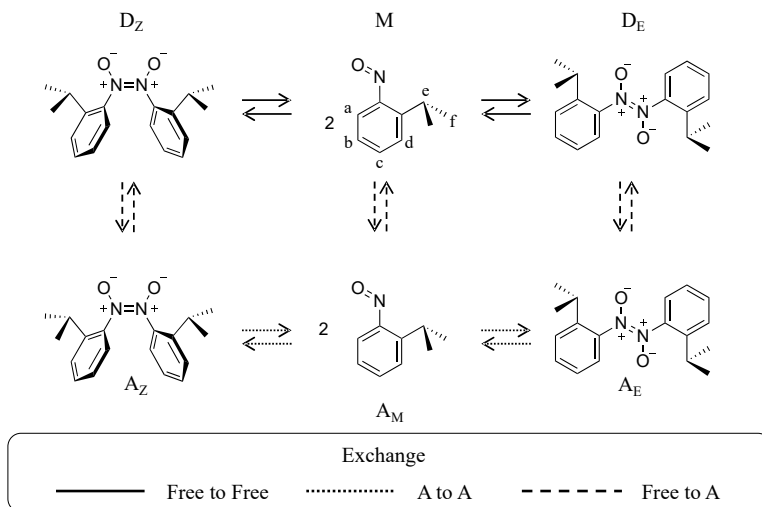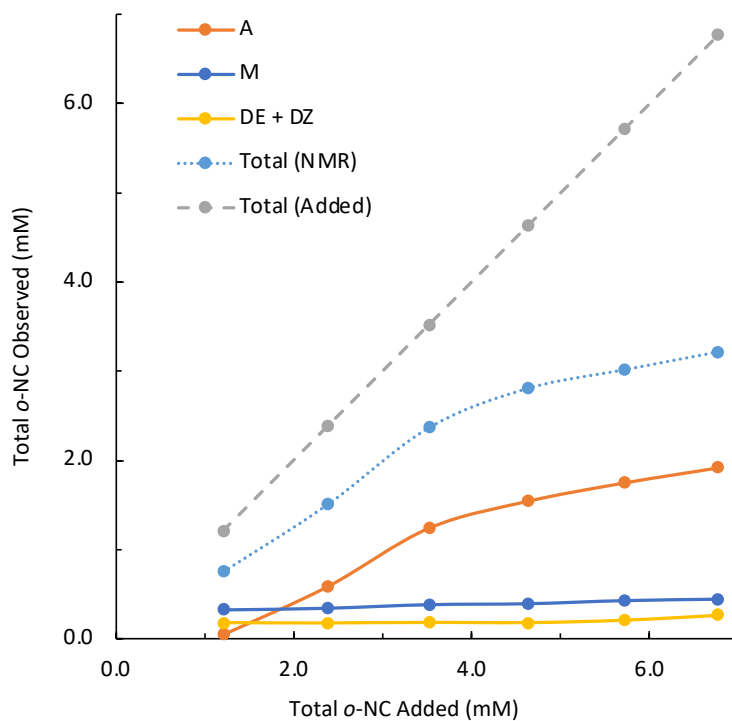

**Figure S26.** Concentration (mM) profile of *o*-NC structures in D<sub>2</sub>O at 25 °C.

Figure 5 shows the concentration profile of *o*-NC components in D<sub>2</sub>O as *o*-NC concentration is increased beyond 1 mM. Dissolved M and D signals remain steady at their saturation values, while the aggregate signals grow in intensity with added *o*-NC (added as stock solution in DMSO-*d*<sub>6</sub>). The solution also continues to grow more turbid. Not all the added *o*-NC is being observed in the NMR spectrum as determined by quantitation using Me<sub>2</sub>SO<sub>2</sub> as internal standard.



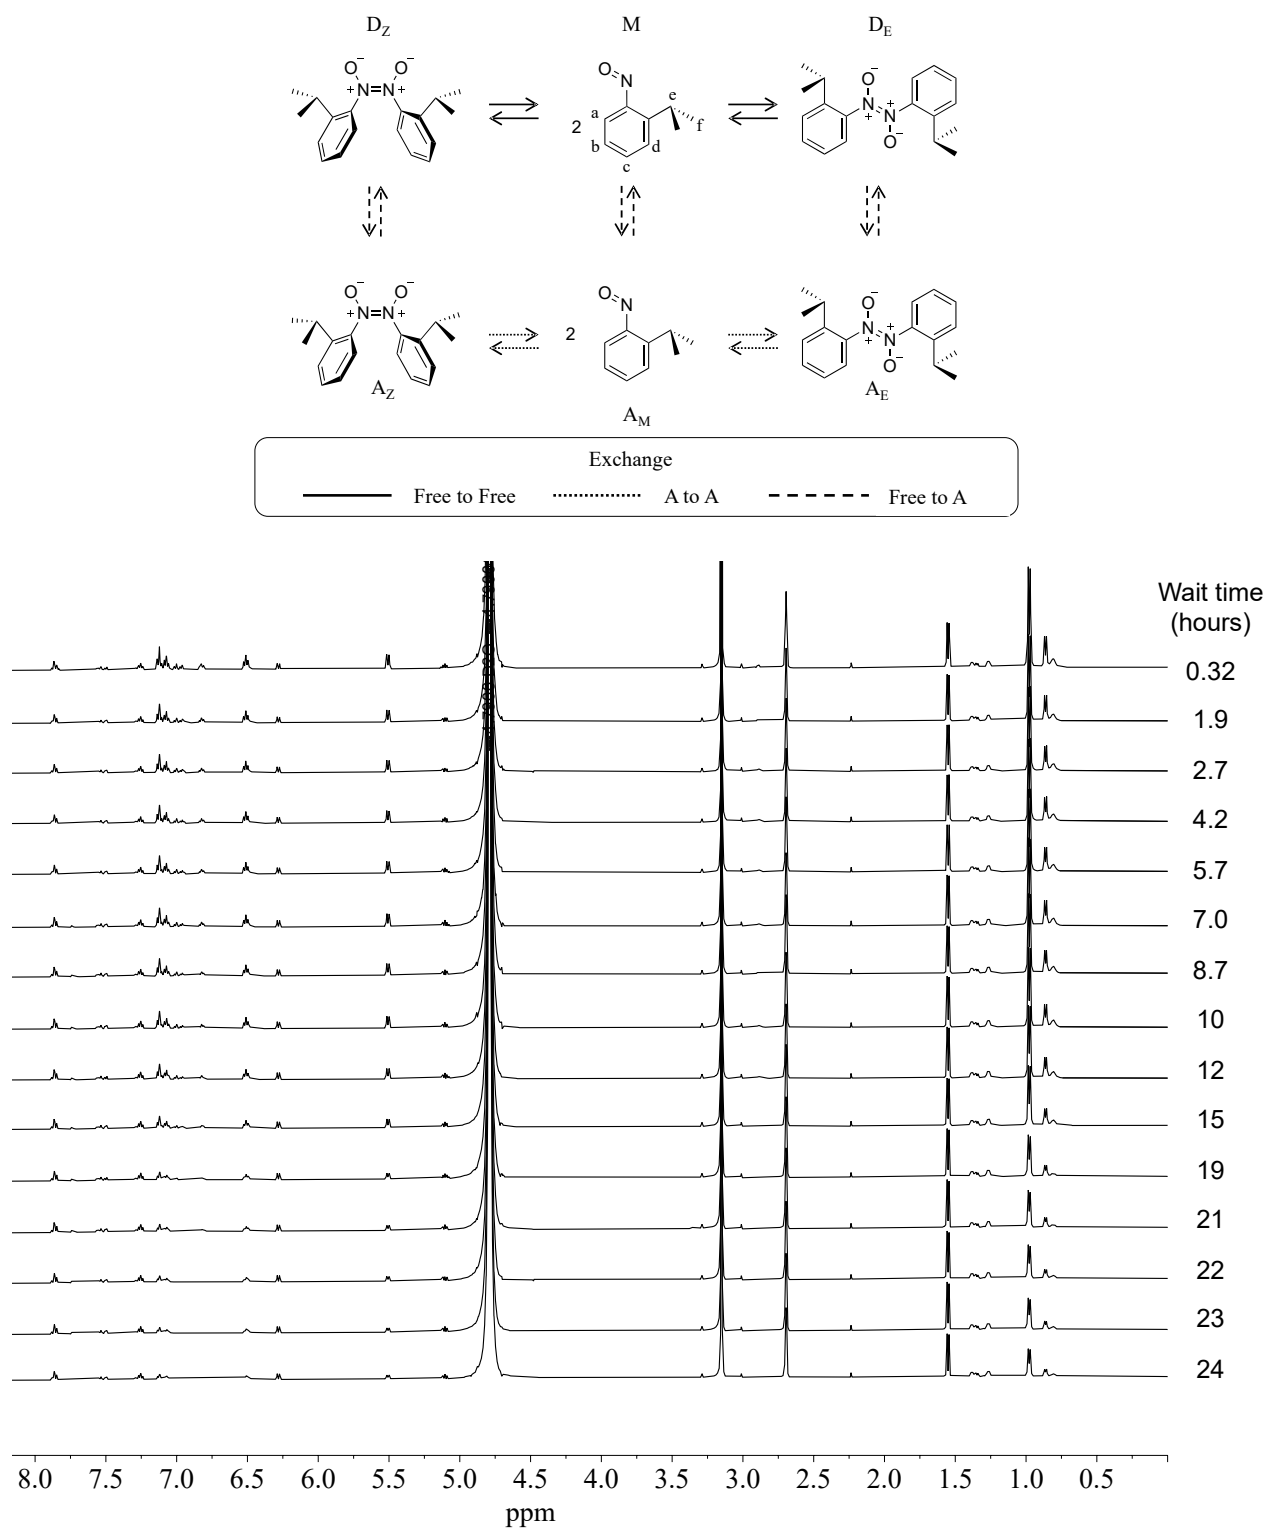

**Figure S27.** <sup>1</sup>H NMR spectra (D<sub>2</sub>O, 500 MHz) Concentration of 2.40 mM *o*-NC solution species (M, D, A) as a function of time (after preparation of sample).



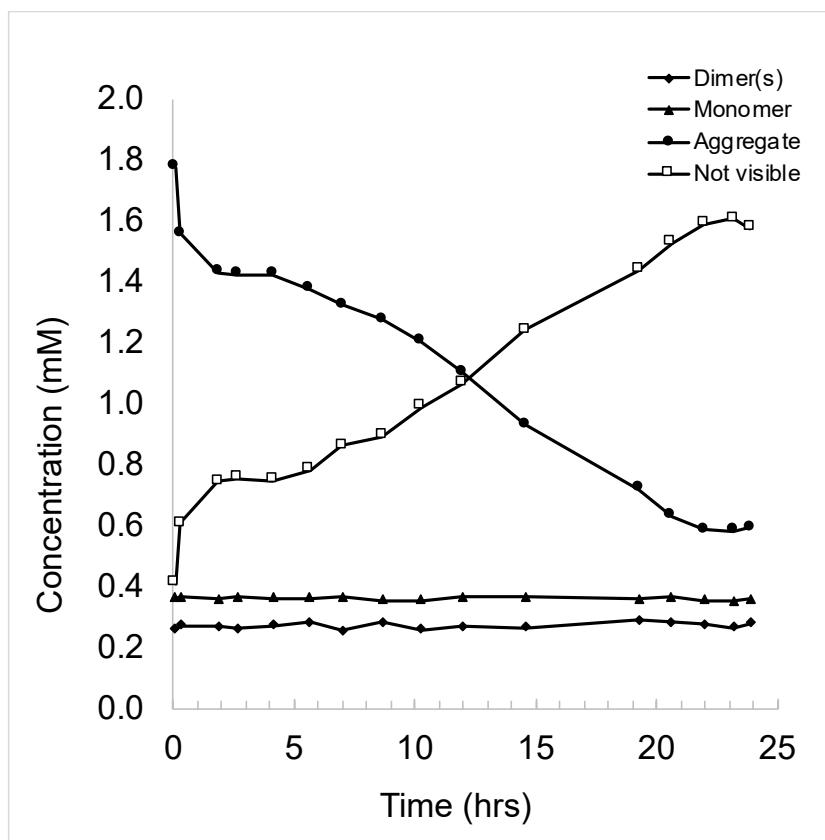

**Figure S28.** Plot of 2.40 mM *o*-NC solution species (M, D, A) as a function of time (since preparation of sample).

7. *o*-NC aggregate analysis in water via COSY, EXSY, DOSY NMR spectroscopy

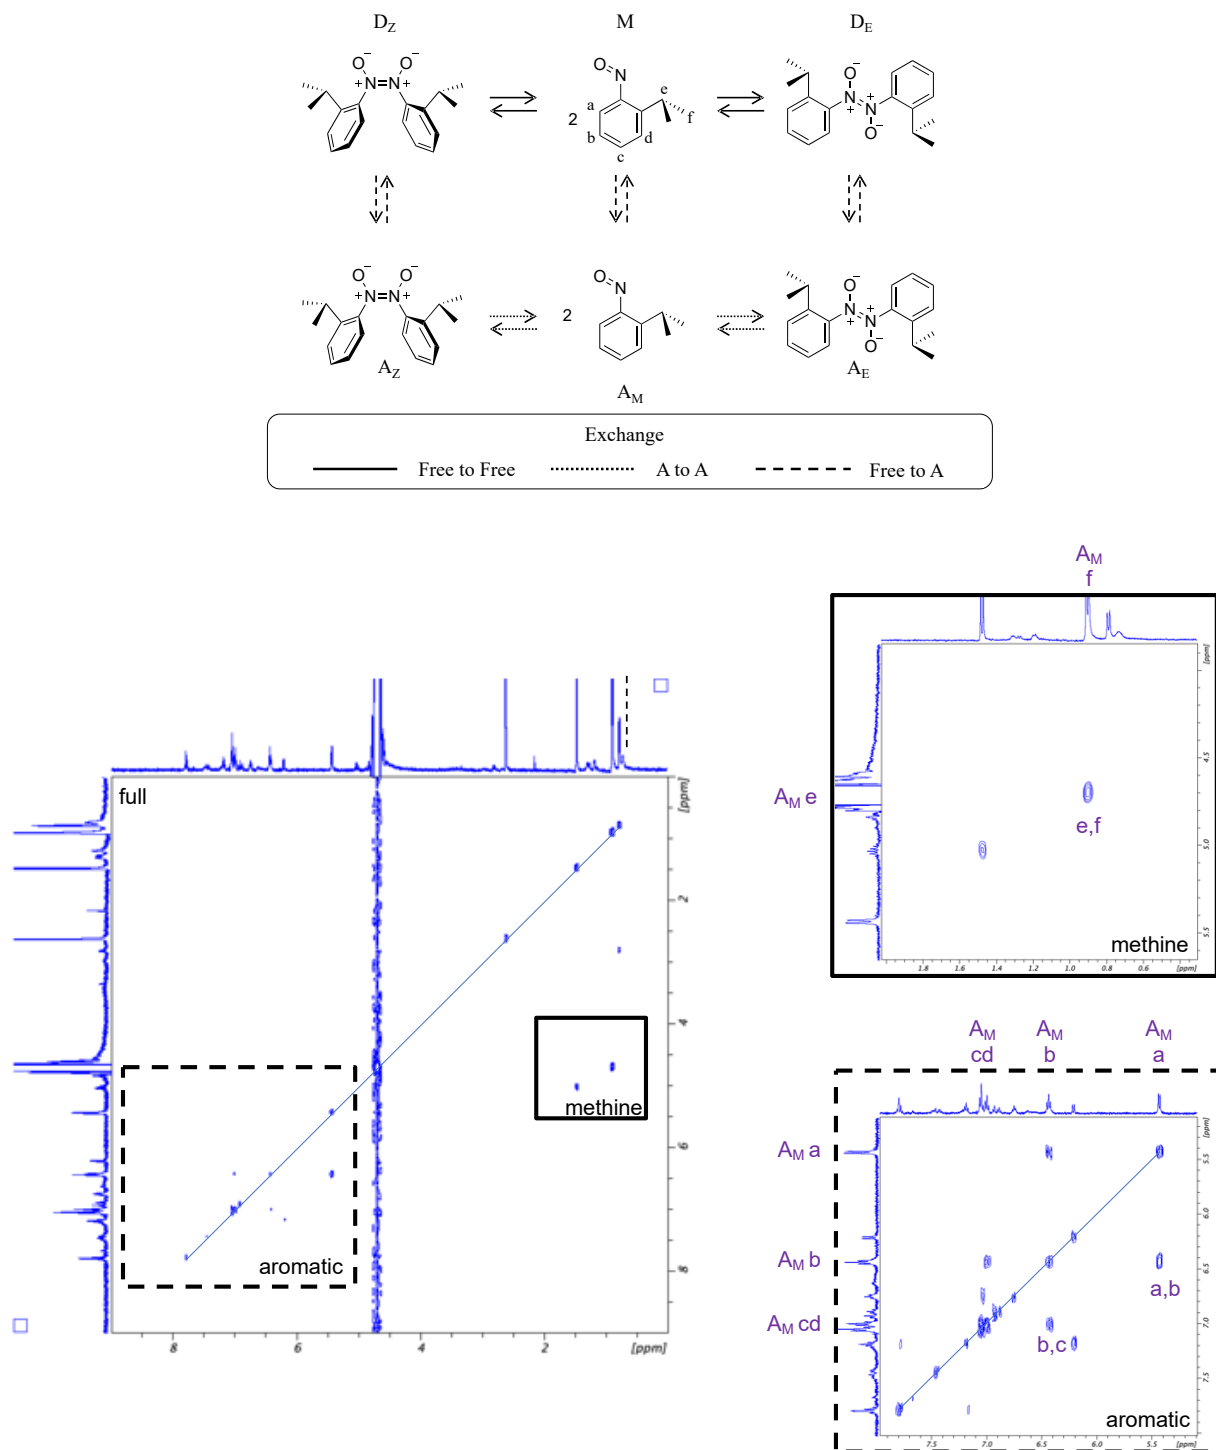

Figure S29. 2D COSY spectrum ( $D_2O$ , 500 MHz)  $\sim 4.1$  mM *o*-NC in  $D_2O$

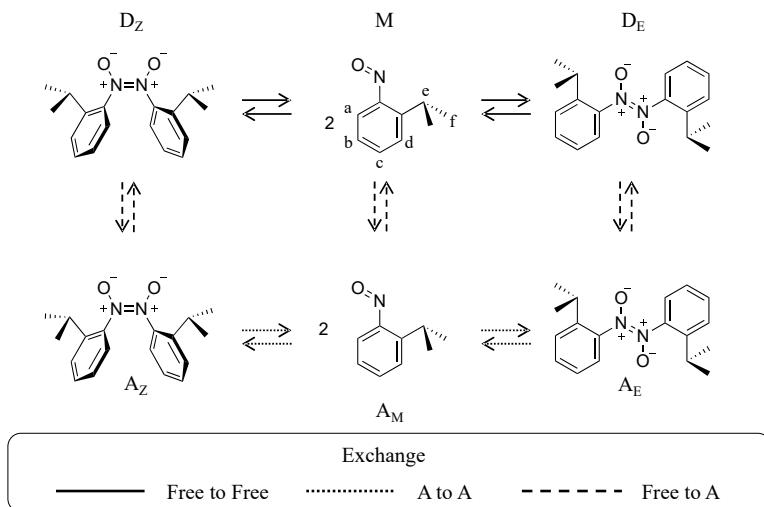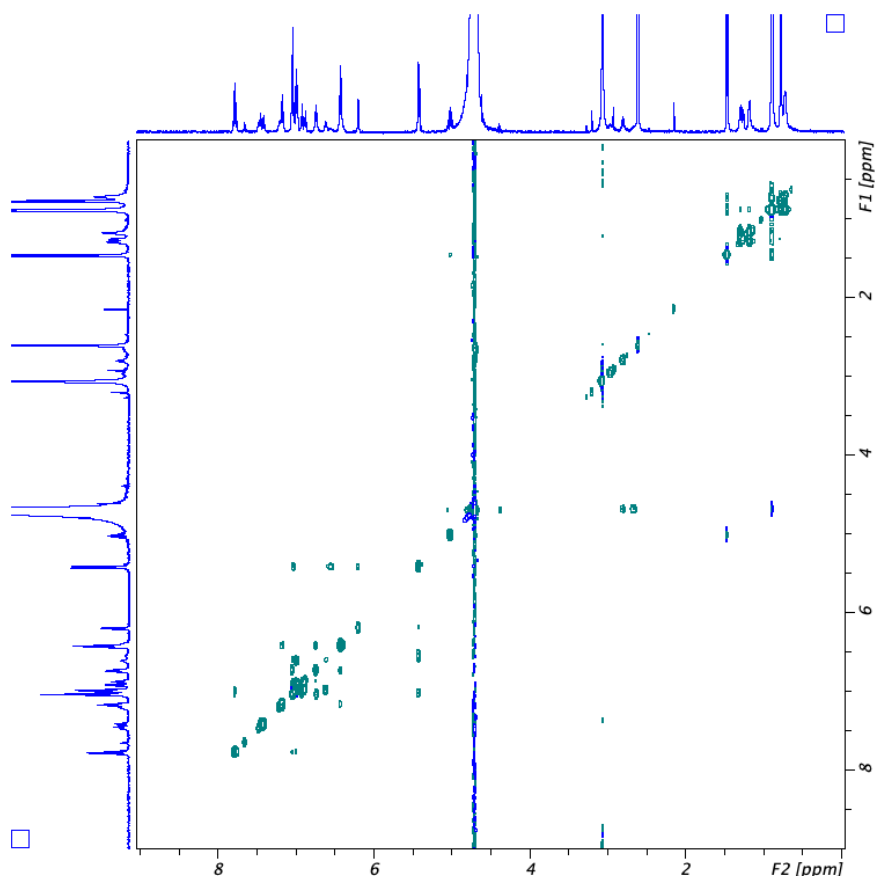

**Figure S30.** 2D EXSY  $^1\text{H}$ -NMR spectrum (500 MHz) 2.40 M *o*-NC in  $\text{D}_2\text{O}$ . In this EXSY exchange peaks (green) observed for  $M \rightleftharpoons D$ ,  $M \rightleftharpoons A$ ,  $D \rightleftharpoons A$  but not  $D \rightleftharpoons D$ .

For zoomed aromatic and methyl regions, refer to pages S45 and S46.

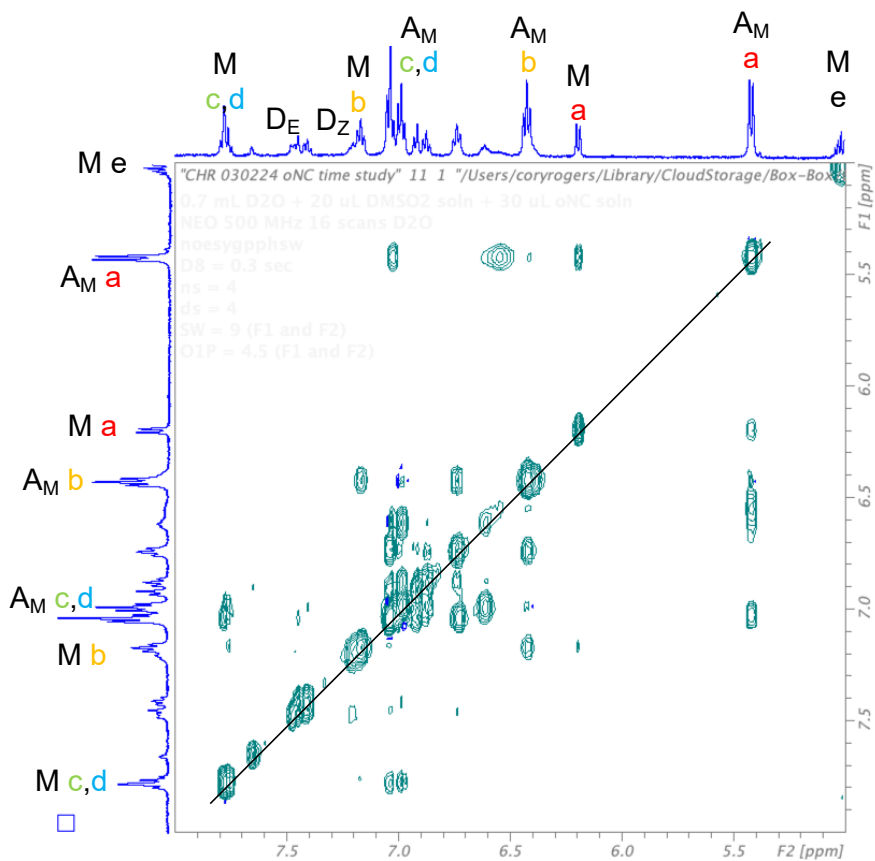

**Figure S31.** 2D EXSY  $^1\text{H}$ -NMR spectrum (500 MHz) aromatic region of 2.40 M *o*-NC in  $\text{D}_2\text{O}$ . In this EXSY exchange peaks (green) observed for  $\text{M} \rightleftharpoons \text{D}$ ,  $\text{M} \rightleftharpoons \text{A}$ ,  $\text{D} \rightleftharpoons \text{A}$  but not  $\text{D} \rightleftharpoons \text{D}$ .

Note: major exchange signals representing  $\text{M} \rightleftharpoons \text{A}_\text{M}$  are indicated by dashed lines.

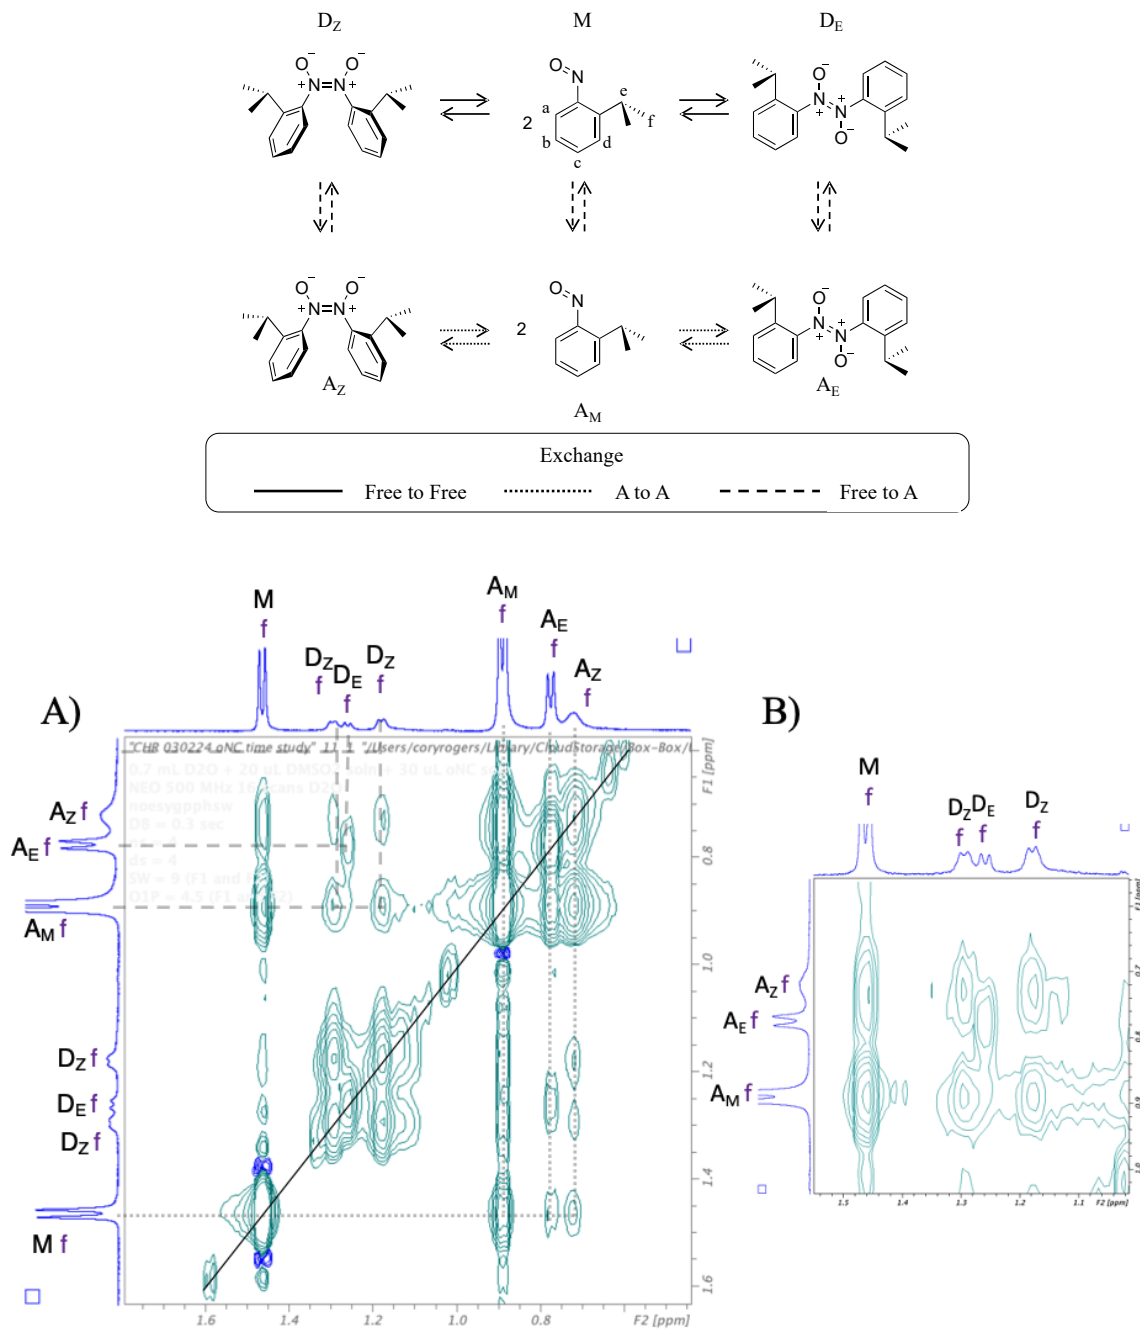

**Figure S32.** A) 2D EXSY <sup>1</sup>H-NMR spectrum (500 MHz) methyl region of 2.40 M *o*-NC in D<sub>2</sub>O. In this EXSY exchange peaks (green) observed for M ⇌ D, M ⇌ A, D ⇌ A but not D ⇌ D and B) Zoom region for D ⇌ A<sub>M</sub>

Note: diastereotopic methyl signals for D<sub>Z</sub> (anti) exchange ~1.1-1.3 ppm.

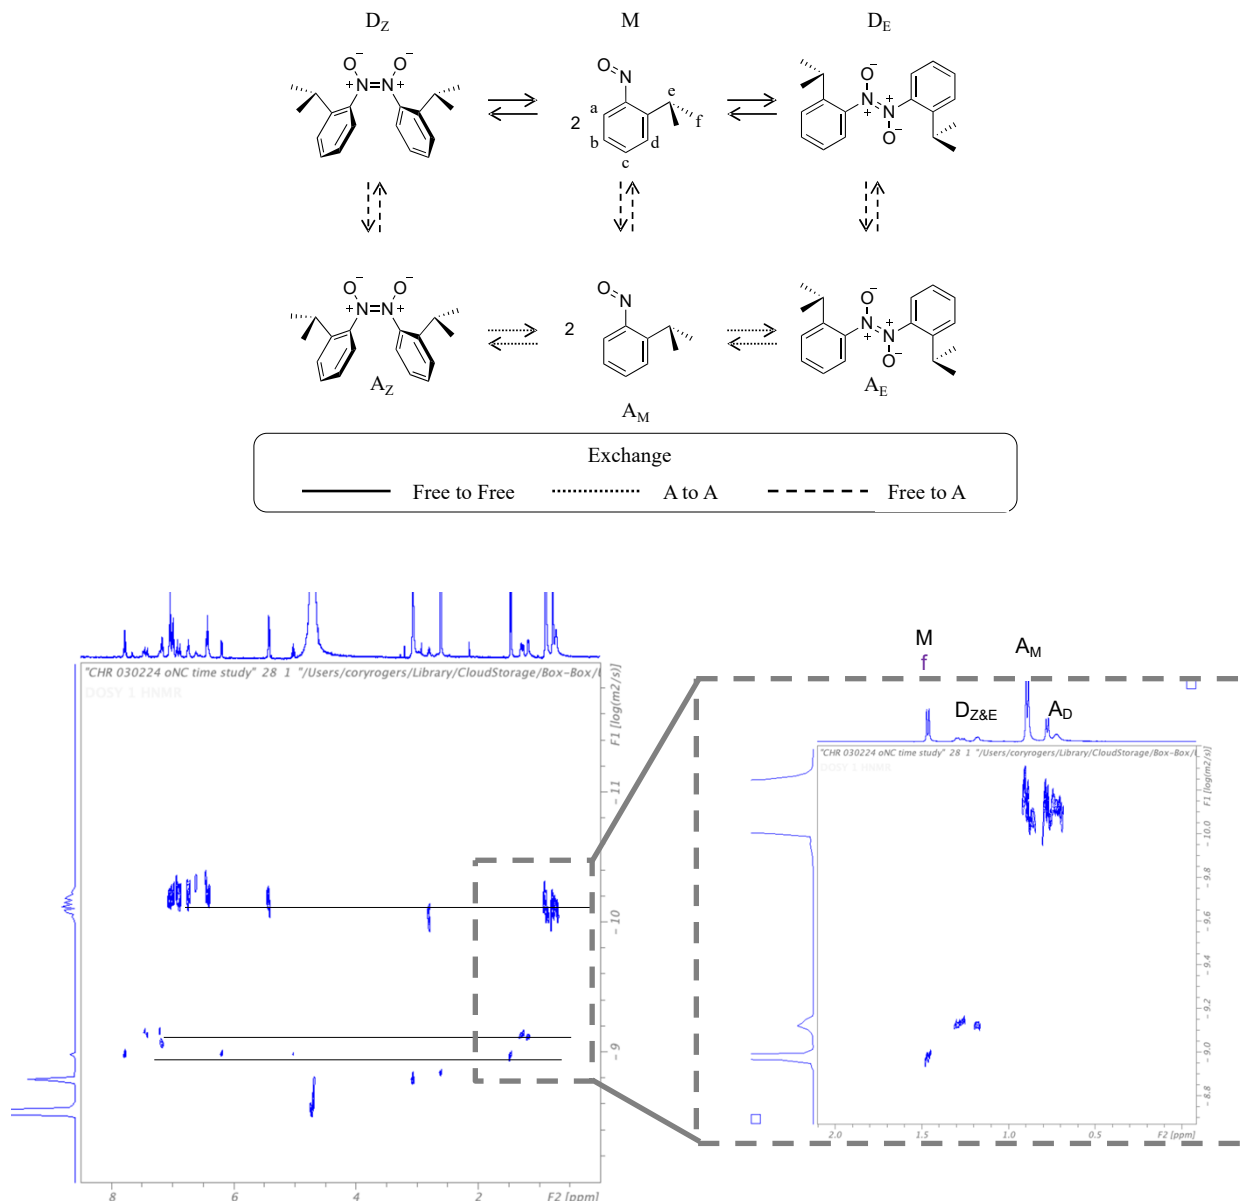

**Figure S33.** 2D DOSY spectrum (500 MHz) 2.40 mM *o*-NC in D<sub>2</sub>O



**Table S15.** Diffusion coefficients and hydrodynamic radii from DOSY analysis of M, D, and A assemblies of 2.40 mM *o*-NC over time.

Stokes-Einstein Eq.

$$D = \frac{K_B T}{6\pi\eta R}$$

| time<br>hrs  | Monomer                                 |        | Dimer(s)                                |        | Aggregate                               |        |
|--------------|-----------------------------------------|--------|-----------------------------------------|--------|-----------------------------------------|--------|
|              | D<br>10 <sup>10</sup> m <sup>2</sup> /s | R<br>Å | D<br>10 <sup>10</sup> m <sup>2</sup> /s | R<br>Å | D<br>10 <sup>10</sup> m <sup>2</sup> /s | R<br>Å |
| 1.8          | 9.07                                    | 2.71   | 6.10                                    | 4.0    | 0.180                                   | 136    |
| 3.2          | 9.67                                    | 2.54   | 6.34                                    | 3.87   | 0.624                                   | 39.3   |
| 4.7          | 10.1                                    | 2.43   | 7.17                                    | 3.42   | 0.650                                   | 37.7   |
| 6.2          | 10.1                                    | 2.42   | 7.18                                    | 3.41   | 0.692                                   | 35.5   |
| 7.5          | 10.3                                    | 2.39   | 7.59                                    | 3.23   | 0.717                                   | 34.2   |
| 9.2          | 10.2                                    | 2.41   | 7.46                                    | 3.29   | 0.744                                   | 33.0   |
| 11           | 10.2                                    | 2.40   | 7.49                                    | 3.27   | 0.768                                   | 31.9   |
| 12           | 10.2                                    | 2.42   | 7.35                                    | 3.34   | 0.733                                   | 33.4   |
| 15           | 9.92                                    | 2.47   | 6.70                                    | 3.66   | 0.743                                   | 33.0   |
| 20           | 10.1                                    | 2.44   | 7.17                                    | 3.42   | 0.872                                   | 28.1   |
| 22           | 9.92                                    | 2.47   | 6.66                                    | 3.68   | 0.786                                   | 31.2   |
| 23           | 10.1                                    | 2.43   | 7.14                                    | 3.44   | 0.820                                   | 29.9   |
| <i>avg</i>   | 9.97                                    | 2.46   | 7.03                                    | 3.50   | 0.74                                    | 33.4   |
| <i>stdev</i> | 0.33                                    | 0.09   | 0.47                                    | 0.25   | 0.18                                    | 3.2    |

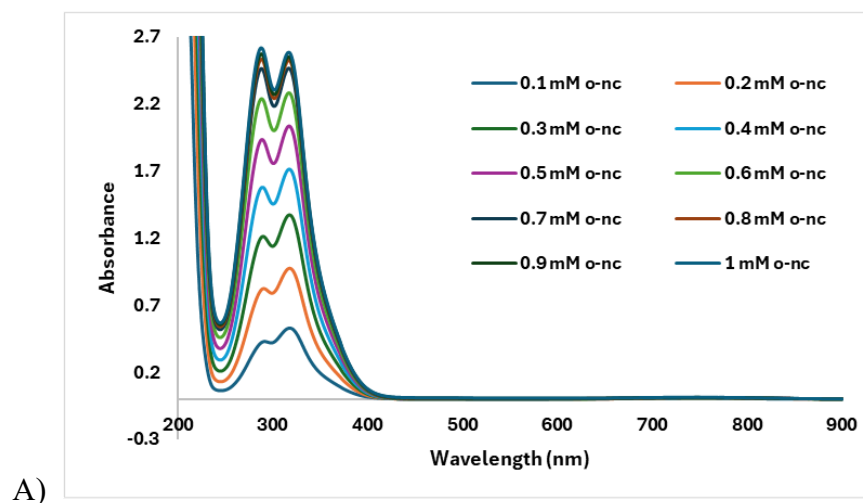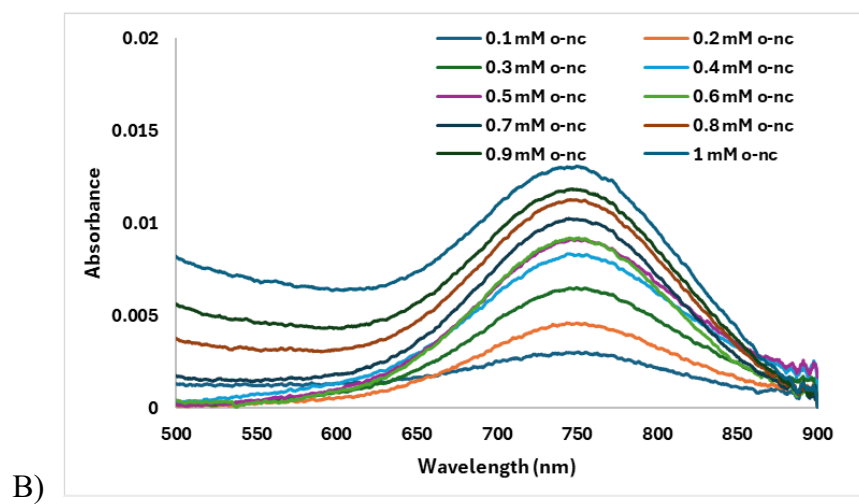

**Figure S34.** Concentration based UV-Vis titrations of *o*-NC in water.

**Figure S35.** Dynamic light scattering (DLS) of 2.0 mM *o*-NC in water at different times (0, 2, 4, 6, 24 hours) after initial sample preparation.

## 8. DFT calculation data supporting *o*-NC assembly in organic solvents and water

### Computational details

Density functional theory (DFT) calculations were performed using Gaussian 16.<sup>6</sup> Geometry optimizations were performed with the  $\omega$ B97X-D functional,<sup>7</sup> using the 6-31+G(d,p) basis set, and SMD implicit solvation<sup>8</sup> to model the effects of chloroform or water. Vibrational analysis on all stationary points allowed for the confirmation of minima structures (zero imaginary frequencies) and transition structures (TS, exactly one imaginary frequency). Zero-point energy, enthalpy and free energy corrections were obtained with a state of 1 atm pressure and 298.15 K temperature using Goodvibes version 2.0.3,<sup>9</sup> applying Grimme's quasiharmonic oscillator approximation with a frequency cut-off value of 100 cm<sup>-1</sup>. To obtain accurate energies, single point energy refinements were then performed at the  $\omega$ B97X-D/aug-cc-pVTZ level of theory, using the SMD implicit solvation model. The free energy values reported were then obtained by adding the free energy corrections obtained from the frequency analysis to the single-point electronic energies. The free energy values for the chloroform or water solvation models are different, but the geometries of the structures are similar, see Figure S33 and S35. Visualizations of the computed structures were prepared using CYLview.<sup>10</sup>

### Additional figures and schemes

---

<sup>6</sup> M. J. Frisch, G. W. Trucks, H. B. Schlegel, G. E. Scuseria, M. A. Robb, J. R. Cheeseman, G. Scalmani, V. Barone, G. A. Petersson, H. Nakatsuji, X. Li, M. Caricato, A. V. Marenich, J. Bloino, B. G. Janesko, R. Gomperts, B. Mennucci, H. P. Hratchian, J. V. Ortiz, A. F. Izmaylov, J. L. Sonnenberg, Williams, F. Ding, F. Lipparini, F. Egidi, J. Goings, B. Peng, A. Petrone, T. Henderson, D. Ranasinghe, V. G. Zakrzewski, J. Gao, N. Rega, G. Zheng, W. Liang, M. Hada, M. Ehara, K. Toyota, R. Fukuda, J. Hasegawa, M. Ishida, T. Nakajima, Y. Honda, O. Kitao, H. Nakai, T. Vreven, K. Throssell, J. A. Montgomery Jr., J. E. Peralta, F. Ogliaro, M. J. Bearpark, J. J. Heyd, E. N. Brothers, K. N. Kudin, V. N. Staroverov, T. A. Keith, R. Kobayashi, J. Normand, K. Raghavachari, A. P. Rendell, J. C. Burant, S. S. Iyengar, J. Tomasi, M. Cossi, J. M. Millam, M. Klene, C. Adamo, R. Cammi, J. W. Ochterski, R. L. Martin, K. Morokuma, O. Farkas, J. B. Foresman, D. J. Fox, Gaussian 16 Rev. C.01, Wallingford, CT, 2016.

<sup>7</sup> J. D. Chai, M. Head-Gordon, Long-range corrected hybrid density functionals with damped atom-atom dispersion corrections. *Phys Chem Chem Phys* 2008, **10**, 6615-20.

<sup>8</sup> A. V. C. Marenich, C. J. Cramer, D. G. Truhlar, Universal Solvation Model Based on Solute Electron Density and on a Continuum Model of the Solvent Defined by the Bulk Dielectric Constant and Atomic Surface Tensions. *J. Phys. Chem. B* 2009, **113**, 6378–6396.

<sup>9</sup> I. P. Funes-Ardoiz, R. S. GoodVibes: GoodVibes 2.0.3 2018.

<sup>10</sup> C. Y. Legault, CYLview, 1.0.565b. Université de Sherbrooke 2009.

## Additional figures and schemes

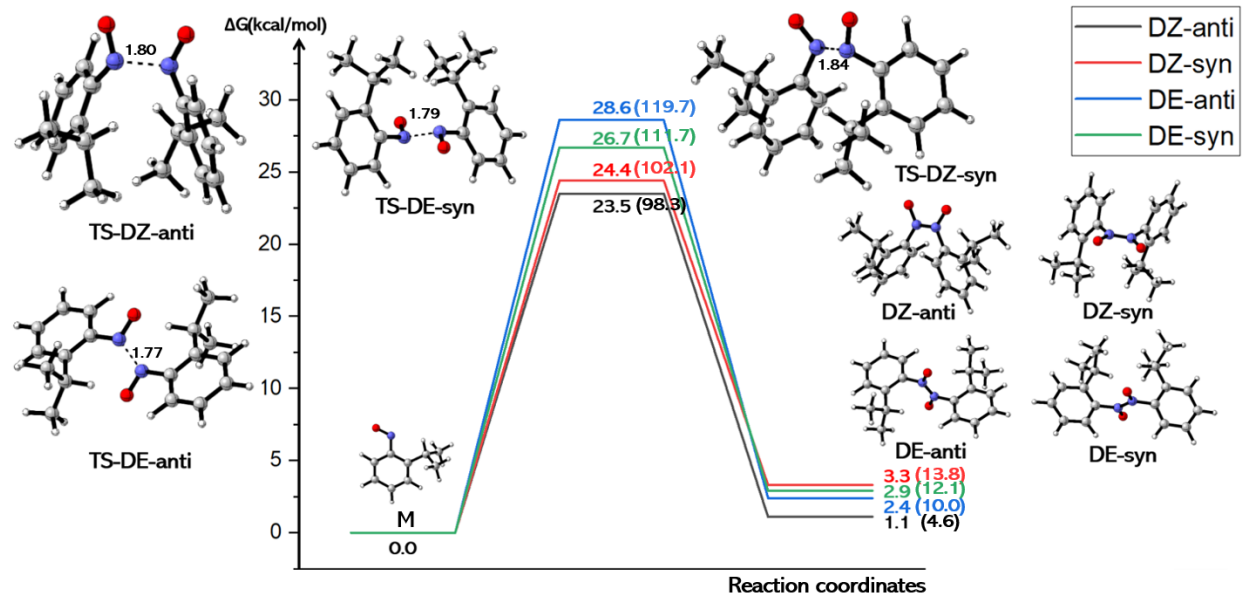

**Figure S36.** PES from Monomer to Dimers in chloroform: Calculation performed at  $\omega$ B97X-D/6-31G(d,p)/SMD(chloroform)// $\omega$ B97X-D/aug-cc-pVTZ/SMD(chloroform). Energies are in kcal/mol with (kJ/mol in parenthesis). Bond lengths in Å.

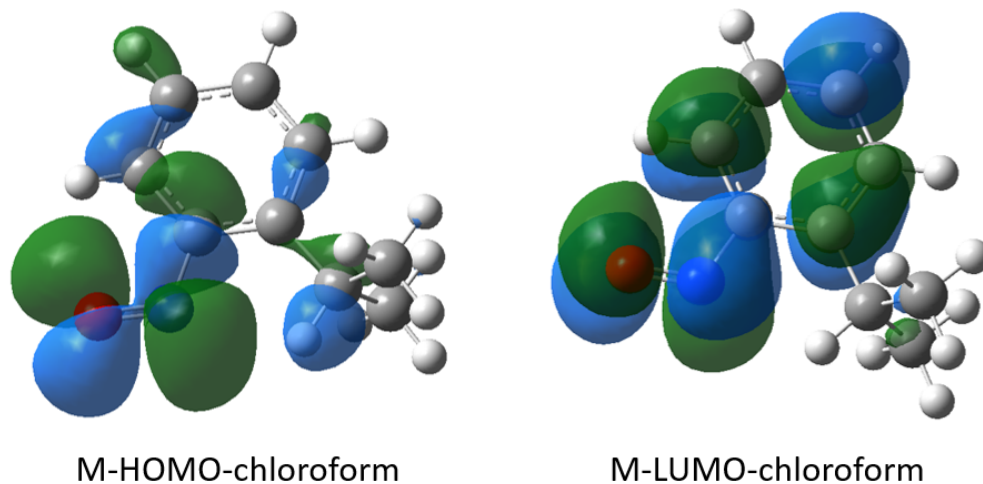

**Figure S37.** HOMO and LUMO for monomer in chloroform: Calculation performed at  $\omega$ B97X-D/6-31G(d,p)/SMD(chloroform).

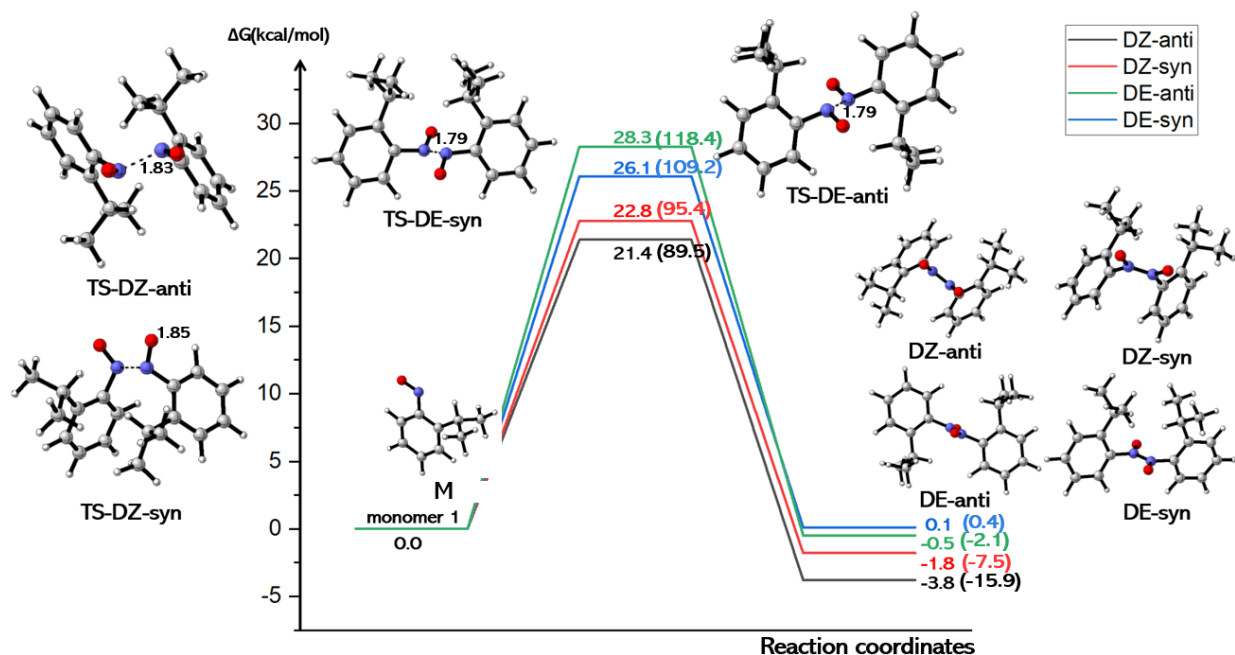

**Figure S38.** PES from Monomer to Dimers in water: Calculation performed at  $\omega$ B97X-D/6-31G(d,p)/SMD(water)// $\omega$ B97X-D/aug-cc-pVTZ/SMD(water). Energies are in kcal/mol with (kJ/mol in parenthesis). Bond length in Å.

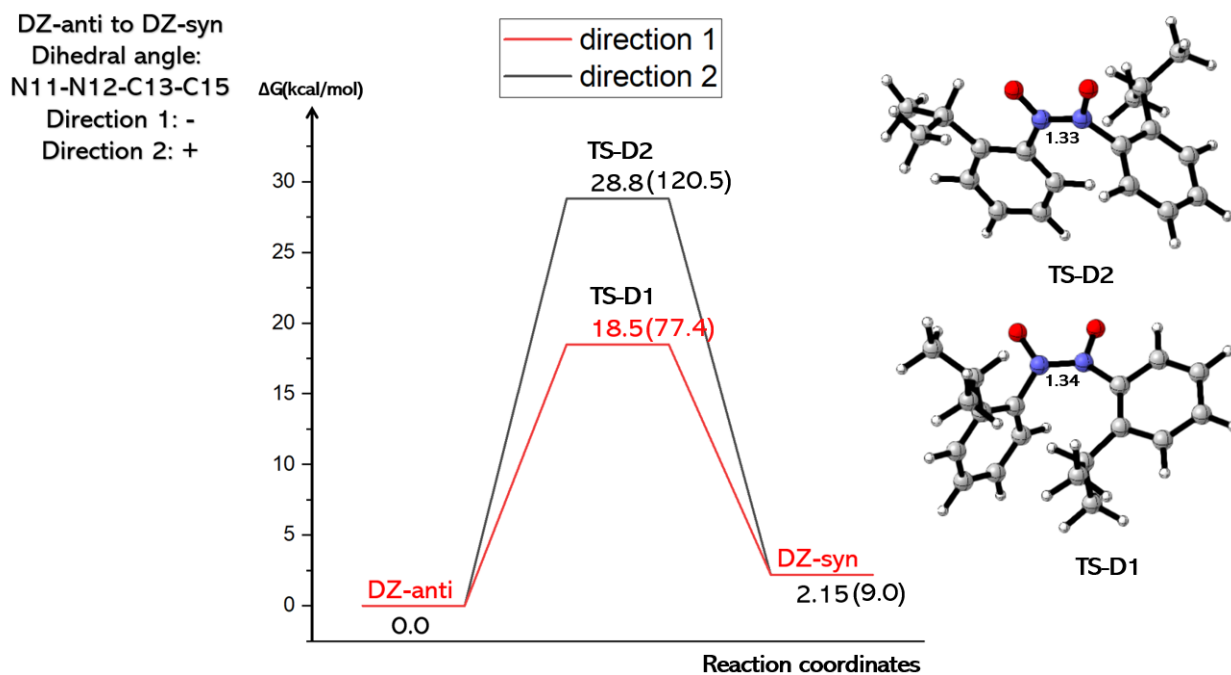

**Figure S39.** PES of phenyl rotation within the  $D_z$  dimer: Calculation performed at  $\omega$ B97X-D/6-31G(d,p)/SMD(chloroform)// $\omega$ B97X-D/aug-cc-pVTZ/SMD(chloroform). Energies are in kcal/mol with (kJ/mol in parenthesis). Bond length in Å.

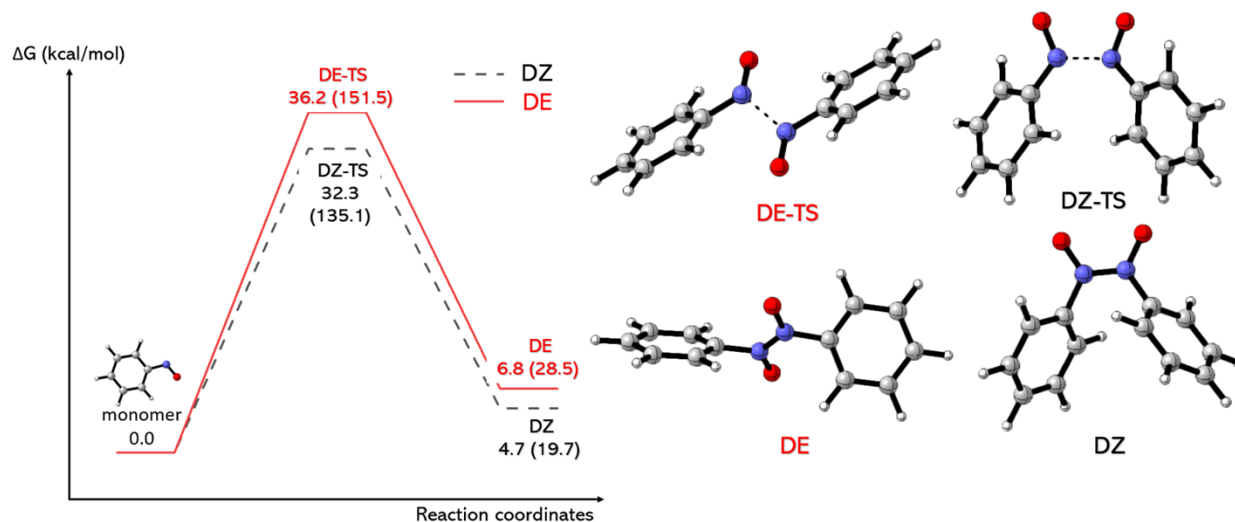

**Figure S40.** PES for nitrosobenzene from Monomer to Dimers in chloroform: Calculation performed at  $\omega$ B97X-D/6-31G(d,p)/SMD(chloroform)// $\omega$ B97X-D/aug-cc-pVTZ/SMD(chloroform). Energies are in kcal/mol with (kJ/mol in parenthesis). Bond lengths in Å.

**Figure S41.** Modeling of specific solvation effect of M to D<sub>Z</sub> in water: Calculation performed at  $\omega$ B97X-D/6-31G(d,p)/SMD(water)// $\omega$ B97X-D/aug-cc-pVTZ/SMD(water). Energies are in kcal/mol with (kJ/mol).

With explicit water molecules added into the calculation, the M  $\rightarrow$  D<sub>Z</sub> free energy of reaction becomes even more exergonic. This suggests that the dimer is preferentially stabilized by polar, hydrogen bond-donating solvents.

### Complete energy data

Energy (E), enthalpy (H) and quasi-harmonic-corrected free energy (qh-G(T)) are obtained from the  $\omega$ B97X-D/6-31+G(d,p)/SMD optimizations and frequency calculations. Single-point refinements (SPE) are obtained at the  $\omega$ B97X-D/aug-cc-pVTZ/SMD level of theory.

**Table S16.** Absolute energy (in Hartrees) of all computed structures

| Name<br>(chloroform) | E           | H           | qh-G(T)     | aug-cc-pVTZ |
|----------------------|-------------|-------------|-------------|-------------|
| DZ-anti              | -958.759889 | -958.365463 | -958.433394 | -959.029407 |
| DZ-syn               | -958.756871 | -958.362511 | -958.430065 | -959.026292 |
| M                    | -479.366399 | -479.171419 | -479.218096 | -479.500639 |
| DE-anti              | -958.755055 | -958.361219 | -958.43093  | -959.024149 |
| DE-syn               | -958.757017 | -958.363101 | -958.431923 | -959.025998 |
| TS-DZ-anti           | -958.72224  | -958.331283 | -958.399367 | -958.990158 |
| TS-DZ-syn            | -958.720604 | -958.3295   | -958.397752 | -958.98856  |
| TS-DE-anti           | -958.716521 | -958.325689 | -958.394301 | -958.984379 |
| TS-DE-syn            | -958.713142 | -958.322276 | -958.391133 | -958.98112  |

| Name<br>(water) | E           | H           | qh-G(T)     | aug-cc-pVTZ |
|-----------------|-------------|-------------|-------------|-------------|
| DZ-anti         | -958.752662 | -958.358369 | -958.426026 | -959.020865 |
| DZ-syn          | -958.749449 | -958.355205 | -958.422796 | -959.017588 |
| M               | -479.358453 | -479.163682 | -479.210335 | -479.492186 |
| DE-anti         | -958.743715 | -958.350138 | -958.41988  | -959.011734 |
| DE-syn          | -958.746695 | -958.352733 | -958.421059 | -959.01449  |
| TS-DZ-anti      | -958.708988 | -958.318541 | -958.387036 | -958.975948 |
| TS-DZ-syn       | -958.706798 | -958.316344 | -958.384776 | -958.973843 |
| TS-DE-anti      | -958.7012   | -958.310769 | -958.3795   | -958.968165 |
| TS-DE-syn       | -958.698333 | -958.307609 | -958.376071 | -958.965318 |

| Name<br>(chloroform)              | E           | H           | qh-G(T)     | aug-cc-pVTZ |
|-----------------------------------|-------------|-------------|-------------|-------------|
| TS1-DZ-anti to<br>DZ-syn-dihedral | -958.715235 | -958.322136 | -958.38815  | -958.98418  |
| TS2-DZ-anti to<br>DZ-syn-dihedral | -958.730766 | -958.337724 | -958.404032 | -959.00017  |

| Name (water)              | E            | H            | qh-G(T)      | aug-cc-pVTZ  |
|---------------------------|--------------|--------------|--------------|--------------|
| M-H <sub>2</sub> O        | -555.787533  | -555.565178  | -555.61965   | -555.780396  |
| DZ-anti-2H <sub>2</sub> O | -1111.619344 | -1111.169379 | -1111.248078 | -1111.569871 |

### Nitrosobenzene

| Name<br>(chloroform) | E          | H           | qh-G(T)    | aug-cc-pVTZ |
|----------------------|------------|-------------|------------|-------------|
| DZ                   | -722.90532 | -722.689971 | -722.74175 | -723.115852 |



|         |             |             |             |             |
|---------|-------------|-------------|-------------|-------------|
| DE      | -722.901598 | -722.686555 | -722.738878 | -723.111655 |
| Monomer | -361.443102 | -361.337666 | -361.375132 | -361.54787  |
| DZ-TS   | -722.868856 | -722.656489 | -722.708751 | -723.068498 |
| DE-TS   | -722.863023 | -722.650872 | -722.703548 | -723.061631 |

**XYZ coordinates of all DFT-optimized geometries and vibrational frequencies for TS**

|                             |          |          |          |                            |          |          |          |
|-----------------------------|----------|----------|----------|----------------------------|----------|----------|----------|
| <b>DE-anti (chloroform)</b> |          |          |          | H                          | 4.06018  | -1.99971 | 1.59802  |
| C                           | 2.97375  | 2.71719  | -0.05798 | H                          | 3.21217  | -1.85179 | -2.10898 |
| C                           | 1.74080  | 2.11608  | -0.27198 | H                          | 4.55719  | -2.04966 | -0.96898 |
| C                           | 1.65893  | 0.72807  | -0.24598 | H                          | 3.34931  | -3.33277 | -1.14198 |
| C                           | 2.75301  | -0.10683 | -0.02698 | C                          | -2.60015 | 1.61368  | 0.24802  |
| C                           | 3.98095  | 0.53129  | 0.18102  | C                          | -3.58920 | 2.20959  | 1.25602  |
| C                           | 4.09482  | 1.91830  | 0.16902  | C                          | -2.71421 | 2.29967  | -1.11998 |
| H                           | 3.06065  | 3.79820  | -0.07198 | H                          | -1.59517 | 1.80877  | 0.63702  |
| H                           | 0.84875  | 2.70600  | -0.45998 | H                          | -3.51716 | 1.70759  | 2.22602  |
| H                           | 4.86601  | -0.07363 | 0.35602  | H                          | -3.37130 | 3.27161  | 1.40502  |
| H                           | 5.06378  | 2.37839  | 0.33502  | H                          | -4.62320 | 2.13049  | 0.90402  |
| N                           | 0.35699  | 0.15495  | -0.53598 | H                          | -1.98618 | 1.89173  | -1.82798 |
| N                           | -0.36598 | -0.23911 | 0.46602  | H                          | -3.71620 | 2.16058  | -1.54198 |
| O                           | -0.05101 | 0.07691  | -1.73198 | H                          | -2.53631 | 3.37568  | -1.01998 |
| O                           | 0.04502  | -0.16808 | 1.66202  | <b>DE-syn (chloroform)</b> |          |          |          |
| C                           | -1.68493 | -0.76824 | 0.17402  | C                          | 3.92201  | 0.16191  | -0.14905 |
| C                           | -2.76601 | 0.11066  | 0.10502  | C                          | 2.55401  | 0.26596  | 0.12995  |
| C                           | -1.79880 | -2.14625 | 0.03602  | C                          | 1.83897  | -0.93102 | 0.14995  |
| C                           | -4.01596 | -0.47145 | -0.13498 | C                          | 2.41392  | -2.17604 | -0.07705 |
| C                           | -3.05575 | -2.69136 | -0.19598 | C                          | 3.77492  | -2.24508 | -0.34505 |
| H                           | -0.91574 | -2.77217 | 0.11102  | C                          | 4.52596  | -1.06911 | -0.38205 |
| C                           | -4.16183 | -1.84746 | -0.28398 | H                          | 4.52404  | 1.06389  | -0.18505 |
| H                           | -4.89201 | 0.16547  | -0.20598 | H                          | 1.79889  | -3.06901 | -0.04605 |
| H                           | -3.16865 | -3.76537 | -0.30698 | H                          | 4.24489  | -3.20610 | -0.52305 |
| H                           | -5.14779 | -2.26456 | -0.46798 | H                          | 5.58996  | -1.11315 | -0.59305 |
| C                           | 2.64015  | -1.61984 | -0.01498 | N                          | 0.42697  | -0.90597 | 0.48895  |
| C                           | 3.00720  | -2.18980 | 1.36002  | N                          | -0.42603 | -0.90494 | -0.48905 |
| C                           | 3.49121  | -2.24676 | -1.12698 | O                          | 0.06197  | -0.89095 | 1.70195  |
| H                           | 1.59717  | -1.88793 | -0.21598 | O                          | -0.06203 | -0.88995 | -1.70205 |
| H                           | 2.39016  | -1.74386 | 2.14702  | C                          | -1.83903 | -0.93088 | -0.15005 |
| H                           | 2.85130  | -3.27382 | 1.37302  | C                          | -2.55399 | 0.26614  | -0.13005 |

|                             |          |          |          |                            |          |          |          |
|-----------------------------|----------|----------|----------|----------------------------|----------|----------|----------|
| C                           | -2.41408 | -2.17586 | 0.07695  | H                          | -0.45770 | 3.43919  | -1.96292 |
| C                           | -3.92199 | 0.16119  | 0.14795  | H                          | -2.50276 | 2.44196  | -2.97454 |
| C                           | -3.77508 | -2.24482 | 0.34495  | N                          | -0.49704 | 0.42220  | 1.47733  |
| H                           | -1.79811 | -3.06889 | 0.04595  | N                          | 0.49689  | -0.42389 | 1.47687  |
| C                           | -4.52604 | -1.06979 | 0.38195  | C                          | 1.03587  | -0.92521 | 0.22259  |
| H                           | -4.52496 | 1.06421  | 0.18495  | C                          | 2.19893  | -0.35001 | -0.29606 |
| H                           | -4.24411 | -3.20580 | 0.52295  | C                          | 0.41278  | -2.03283 | -0.34307 |
| H                           | -5.59004 | -1.11375 | 0.59295  | C                          | 2.70290  | -0.92738 | -1.46738 |
| C                           | 1.88806  | 1.61198  | 0.35395  | C                          | 0.93676  | -2.57920 | -1.50737 |
| C                           | 1.77608  | 2.37999  | -0.96905 | H                          | -0.46826 | -2.45402 | 0.12767  |
| C                           | 2.60209  | 2.44196  | 1.42595  | C                          | 2.08282  | -2.01797 | -2.06903 |
| H                           | 0.87505  | 1.42702  | 0.72095  | H                          | 3.60295  | -0.51720 | -1.91412 |
| H                           | 1.25506  | 1.78901  | -1.72905 | H                          | 0.45769  | -3.43689 | -1.96688 |
| H                           | 1.22412  | 3.31401  | -0.82005 | H                          | 2.50280  | -2.43848 | -2.97826 |
| H                           | 2.76809  | 2.63295  | -1.36005 | O                          | 0.97883  | -0.82456 | 2.56764  |
| H                           | 2.68307  | 1.88796  | 2.36595  | O                          | -0.97903 | 0.82161  | 2.56856  |
| H                           | 3.61010  | 2.73192  | 1.10995  | C                          | -2.90712 | -0.80395 | 0.38857  |
| H                           | 2.03812  | 3.35998  | 1.61895  | C                          | -3.31820 | -1.90535 | -0.59407 |
| C                           | -1.88894 | 1.61212  | -0.35405 | C                          | -4.11909 | -0.28630 | 1.17785  |
| C                           | -1.77592 | 2.38011  | 0.96995  | H                          | -2.21318 | -1.24643 | 1.11133  |
| C                           | -2.60191 | 2.44214  | -1.42505 | H                          | -2.47622 | -2.22906 | -1.21424 |
| H                           | -0.87495 | 1.42808  | -0.72105 | H                          | -3.69129 | -2.77364 | -0.04158 |
| H                           | -1.25494 | 1.78809  | 1.72895  | H                          | -4.12116 | -1.57189 | -1.26090 |
| H                           | -1.22388 | 3.31409  | 0.82095  | H                          | -3.81804 | 0.46424  | 1.91329  |
| H                           | -2.76891 | 2.63215  | 1.35995  | H                          | -4.85504 | 0.16715  | 0.50309  |
| H                           | -2.68293 | 1.88814  | -2.36605 | H                          | -4.60518 | -1.11157 | 1.70736  |
| H                           | -3.60990 | 2.73218  | -1.11005 | C                          | 2.90702  | 0.80253  | 0.38963  |
| H                           | -2.03888 | 3.36112  | -1.61805 | C                          | 3.31914  | 1.90606  | -0.59173 |
| <b>DZ-anti (chloroform)</b> |          |          |          | C                          | 4.11896  | 0.28396  | 1.17835  |
| C                           | -2.70293 | 0.92910  | -1.46542 | H                          | 2.21304  | 1.24517  | 1.11287  |
| C                           | -2.19901 | 0.35138  | -0.29574 | H                          | 2.47718  | 2.23049  | -1.21155 |
| C                           | -1.03597 | 0.92497  | 0.22361  | H                          | 3.69220  | 2.77371  | -0.03821 |
| C                           | -0.41286 | 2.03325  | -0.34073 | H                          | 4.12112  | 1.57338  | -1.25790 |
| C                           | -0.93678 | 2.58097  | -1.50442 | H                          | 3.81687  | -0.46743 | 1.91391  |
| C                           | -2.08282 | 2.02140  | -2.06677 | H                          | 4.85493  | -0.16871 | 0.50411  |
| H                           | -3.60296 | 0.51944  | -1.91368 | H                          | 4.60502  | 1.10961  | 1.70884  |
| H                           | 0.46817  | 2.45390  | 0.13053  | <b>DZ-syn (chloroform)</b> |          |          |          |

|   |          |          |          |                                                     |          |          |          |
|---|----------|----------|----------|-----------------------------------------------------|----------|----------|----------|
| C | 2.51301  | -0.97408 | -1.49489 | H                                                   | -1.93888 | 2.75005  | 1.25911  |
| C | 2.01803  | -0.33907 | -0.34989 | H                                                   | -1.21784 | 3.93603  | 0.15411  |
| C | 1.03801  | -1.03704 | 0.36711  | H                                                   | -2.79287 | 3.21108  | -0.22589 |
| C | 0.60697  | -2.31303 | 0.01511  | H                                                   | -0.38092 | 1.49100  | -2.59289 |
| C | 1.12195  | -2.91404 | -1.12589 | H                                                   | -1.77288 | 2.59005  | -2.52489 |
| C | 2.07097  | -2.23407 | -1.88589 | H                                                   | -0.18087 | 3.16800  | -2.04589 |
| H | 3.27002  | -0.47310 | -2.08889 |                                                     |          |          |          |
| H | -0.12205 | -2.82800 | 0.63011  |                                                     |          |          |          |
| H | 0.78792  | -3.90503 | -1.41289 |                                                     |          |          |          |
| H | 2.48096  | -2.69208 | -2.78089 |                                                     |          |          |          |
| N | 0.52502  | -0.44502 | 1.59211  |                                                     |          |          |          |
| N | -0.70596 | -0.00498 | 1.66811  |                                                     |          |          |          |
| C | -1.68397 | -0.28996 | 0.62611  |                                                     |          |          |          |
| C | -2.47301 | -1.41793 | 0.83311  |                                                     |          |          |          |
| C | -1.88094 | 0.59805  | -0.43389 |                                                     |          |          |          |
| C | -3.47801 | -1.71990 | -0.07489 |                                                     |          |          |          |
| H | -2.28802 | -2.04794 | 1.69811  |                                                     |          |          |          |
| C | -2.90395 | 0.26308  | -1.33089 |                                                     |          |          |          |
| C | -3.68499 | -0.87489 | -1.16389 |                                                     |          |          |          |
| H | -4.09404 | -2.60088 | 0.06911  |                                                     |          |          |          |
| H | -3.09993 | 0.91409  | -2.17689 |                                                     |          |          |          |
| H | -4.46800 | -1.09687 | -1.88289 |                                                     |          |          |          |
| O | -1.09395 | 0.55703  | 2.72511  |                                                     |          |          |          |
| O | 1.29603  | -0.27804 | 2.57211  |                                                     |          |          |          |
| C | 2.58007  | 0.99892  | 0.10311  |                                                     |          |          |          |
| C | 2.75110  | 1.99191  | -1.05089 |                                                     |          |          |          |
| C | 3.91206  | 0.78488  | 0.83711  |                                                     |          |          |          |
| H | 1.88108  | 1.43894  | 0.82111  |                                                     |          |          |          |
| H | 1.84110  | 2.07894  | -1.64989 |                                                     |          |          |          |
| H | 2.99213  | 2.98190  | -0.64989 |                                                     |          |          |          |
| H | 3.57009  | 1.70289  | -1.71789 |                                                     |          |          |          |
| H | 3.78504  | 0.11988  | 1.69511  |                                                     |          |          |          |
| H | 4.65905  | 0.34985  | 0.16311  |                                                     |          |          |          |
| H | 4.29909  | 1.74386  | 1.19911  |                                                     |          |          |          |
| C | -1.09491 | 1.89003  | -0.56489 |                                                     |          |          |          |
| C | -1.80587 | 3.01305  | 0.20611  |                                                     |          |          |          |
| C | -0.84689 | 2.29902  | -2.01889 |                                                     |          |          |          |
| H | -0.11791 | 1.73600  | -0.09689 |                                                     |          |          |          |
|   |          |          |          | <b>M (chloroform)</b>                               |          |          |          |
|   |          |          |          | C                                                   | -2.12773 | 1.56953  | 0.00000  |
|   |          |          |          | C                                                   | -2.09600 | 0.18853  | 0.00000  |
|   |          |          |          | C                                                   | -0.86113 | -0.48072 | 0.00000  |
|   |          |          |          | C                                                   | 0.36301  | 0.21604  | 0.00000  |
|   |          |          |          | C                                                   | 0.29628  | 1.61605  | 0.00000  |
|   |          |          |          | C                                                   | -0.92159 | 2.28229  | 0.00000  |
|   |          |          |          | H                                                   | -3.07562 | 2.09772  | 0.00000  |
|   |          |          |          | H                                                   | -3.00912 | -0.39629 | 0.00000  |
|   |          |          |          | H                                                   | 1.21639  | 2.19287  | 0.00000  |
|   |          |          |          | H                                                   | -0.93737 | 3.36830  | 0.00000  |
|   |          |          |          | N                                                   | -0.78641 | -1.90473 | 0.00000  |
|   |          |          |          | O                                                   | -1.85453 | -2.49252 | 0.00000  |
|   |          |          |          | C                                                   | 1.71387  | -0.48023 | 0.00000  |
|   |          |          |          | C                                                   | 2.50894  | -0.13338 | 1.26600  |
|   |          |          |          | C                                                   | 2.50894  | -0.13338 | -1.26600 |
|   |          |          |          | H                                                   | 1.53866  | -1.55719 | 0.00000  |
|   |          |          |          | H                                                   | 1.94888  | -0.39427 | 2.17000  |
|   |          |          |          | H                                                   | 3.45183  | -0.69057 | 1.27800  |
|   |          |          |          | H                                                   | 2.75015  | 0.93457  | 1.31100  |
|   |          |          |          | H                                                   | 1.94888  | -0.39427 | -2.17000 |
|   |          |          |          | H                                                   | 2.74915  | 0.93457  | -1.31100 |
|   |          |          |          | H                                                   | 3.45183  | -0.69057 | -1.27800 |
|   |          |          |          | <b>TS-DE-anti (chloroform)</b>                      |          |          |          |
|   |          |          |          | <b>Imaginary frequency: -428.19 cm<sup>-1</sup></b> |          |          |          |
|   |          |          |          | C                                                   | 3.11280  | 2.67824  | 0.09704  |
|   |          |          |          | C                                                   | 1.88584  | 2.15814  | -0.28496 |
|   |          |          |          | C                                                   | 1.71894  | 0.77413  | -0.33696 |
|   |          |          |          | C                                                   | 2.74501  | -0.12679 | -0.02996 |
|   |          |          |          | C                                                   | 3.97697  | 0.42830  | 0.33804  |

|   |          |          |          |                                                     |          |          |          |
|---|----------|----------|----------|-----------------------------------------------------|----------|----------|----------|
| C | 4.15886  | 1.80532  | 0.40704  | H                                                   | -2.89326 | 3.47778  | -0.87496 |
| H | 3.25671  | 3.75225  | 0.15704  |                                                     |          |          |          |
| H | 1.04879  | 2.80308  | -0.53396 |                                                     |          |          |          |
| H | 4.81002  | -0.22764 | 0.57204  | <b>TS-DE-syn (chloroform)</b>                       |          |          |          |
| H | 5.12483  | 2.20339  | 0.70304  | <b>Imaginary frequency: -438.01 cm<sup>-1</sup></b> |          |          |          |
| N | 0.44098  | 0.22903  | -0.73596 | C                                                   | -3.93703 | -0.00224 | 0.21096  |
| N | -0.44098 | -0.22903 | 0.73604  | C                                                   | -2.60604 | 0.23383  | -0.15004 |
| O | -0.20307 | 0.86899  | -1.56096 | C                                                   | -1.83298 | -0.90014 | -0.44504 |
| O | 0.20307  | -0.86899 | 1.56104  | C                                                   | -2.34293 | -2.19516 | -0.36304 |
| C | -1.71894 | -0.77413 | 0.33704  | C                                                   | -3.67492 | -2.39422 | -0.02404 |
| C | -2.74501 | 0.12679  | 0.03004  | C                                                   | -4.47097 | -1.28826 | 0.26396  |
| C | -1.88584 | -2.15814 | 0.28504  | H                                                   | -4.57206 | 0.84074  | 0.46596  |
| C | -3.97697 | -0.42830 | -0.33796 | H                                                   | -1.68689 | -3.03313 | -0.57904 |
| C | -3.11280 | -2.67824 | -0.09696 | H                                                   | -4.08187 | -3.39824 | 0.02496  |
| H | -1.04879 | -2.80308 | 0.53404  | H                                                   | -5.51196 | -1.42431 | 0.54196  |
| C | -4.15886 | -1.80532 | -0.40696 | N                                                   | -0.43799 | -0.85708 | -0.84404 |
| H | -4.81002 | 0.22764  | -0.57296 | N                                                   | 0.54702  | -0.93203 | 0.64796  |
| H | -3.25671 | -3.75225 | -0.15696 | O                                                   | -0.09702 | -0.03006 | -1.68104 |
| H | -5.12483 | -2.20339 | -0.70296 | O                                                   | 0.20406  | -1.77305 | 1.46896  |
| C | 2.56112  | -1.62481 | -0.18796 | C                                                   | 1.94502  | -0.91697 | 0.27196  |
| C | 3.16218  | -2.42176 | 0.97304  | C                                                   | 2.54596  | 0.32006  | 0.01896  |
| C | 3.13516  | -2.08576 | -1.53596 | C                                                   | 2.64007  | -2.12494 | 0.18796  |
| H | 1.48414  | -1.82589 | -0.20296 | C                                                   | 3.90296  | 0.30212  | -0.32804 |
| H | 2.78716  | -2.06179 | 1.93604  | C                                                   | 3.97807  | -2.11287 | -0.17304 |
| H | 2.89326  | -3.47778 | 0.87504  | H                                                   | 2.11612  | -3.05296 | 0.39396  |
| H | 4.25618  | -2.36268 | 0.98404  | C                                                   | 4.60802  | -0.89185 | -0.42904 |
| H | 2.66512  | -1.55380 | -2.36896 | H                                                   | 4.41492  | 1.24115  | -0.51804 |
| H | 4.21514  | -1.90568 | -1.58196 | H                                                   | 4.52911  | -3.04385 | -0.25804 |
| H | 2.96224  | -3.15877 | -1.67396 | H                                                   | 5.65702  | -0.87280 | -0.70804 |
| C | -2.56112 | 1.62481  | 0.18704  | C                                                   | -2.04110 | 1.64485  | -0.11304 |
| C | -3.13516 | 2.08576  | 1.53604  | C                                                   | -1.81612 | 2.08386  | 1.34096  |
| C | -3.16218 | 2.42176  | -0.97296 | C                                                   | -2.91815 | 2.64881  | -0.87004 |
| H | -1.48414 | 1.82589  | 0.20304  | H                                                   | -1.07410 | 1.63390  | -0.61604 |
| H | -2.66512 | 1.55380  | 2.36904  | H                                                   | -1.17209 | 1.37689  | 1.87396  |
| H | -2.96224 | 3.15877  | 1.67404  | H                                                   | -1.33916 | 3.06988  | 1.36796  |
| H | -4.21514 | 1.90568  | 1.58204  | H                                                   | -2.76512 | 2.15182  | 1.88396  |
| H | -2.78716 | 2.06179  | -1.93596 | H                                                   | -3.08713 | 2.32680  | -1.90204 |
| H | -4.25618 | 2.36268  | -0.98396 | H                                                   | -3.89315 | 2.78477  | -0.39004 |
|   |          |          |          | H                                                   | -2.42319 | 3.62483  | -0.89504 |

|   |         |         |          |
|---|---------|---------|----------|
| C | 1.79390 | 1.62503 | 0.19896  |
| C | 1.93286 | 2.55703 | -1.00704 |
| C | 2.23087 | 2.31905 | 1.49696  |
| H | 0.73591 | 1.37498 | 0.30896  |
| H | 1.64388 | 2.05002 | -1.93204 |
| H | 1.28382 | 3.42900 | -0.87804 |
| H | 2.95884 | 2.92408 | -1.12004 |
| H | 2.07690 | 1.67004 | 2.36496  |
| H | 3.29286 | 2.59009 | 1.45996  |
| H | 1.65283 | 3.23702 | 1.64896  |

**TS-DZ-anti (chloroform)**

**Imaginary frequency: -393.17 cm<sup>-1</sup>**

|   |          |          |          |
|---|----------|----------|----------|
| C | -2.54977 | -0.21164 | -1.44440 |
| C | -1.67485 | -0.68802 | -0.45851 |
| C | -1.67609 | 0.00040  | 0.75882  |
| C | -2.49225 | 1.10418  | 1.00525  |
| C | -3.33217 | 1.56456  | 0.00136  |
| C | -3.35794 | 0.89916  | -1.22596 |
| H | -2.59659 | -0.71718 | -2.40365 |
| H | -2.43643 | 1.59872  | 1.96950  |
| H | -3.95830 | 2.43441  | 0.17070  |
| H | -4.01387 | 1.24846  | -2.01788 |
| N | -0.77817 | -0.45300 | 1.80472  |
| N | 0.77772  | 0.45018  | 1.80536  |
| C | 1.67591  | -0.00121 | 0.75925  |
| C | 1.67499  | 0.68838  | -0.45841 |
| C | 2.49201  | -1.10523 | 1.00382  |
| C | 2.55017  | 0.21396  | -1.44353 |
| C | 3.33220  | -1.56464 | -0.00029 |
| H | 2.43595  | -1.60070 | 1.96858  |
| C | 3.35828  | -0.89704 | -1.22596 |
| H | 2.59724  | 0.72044  | -2.40228 |
| H | 3.95828  | -2.43465 | 0.16837  |
| H | 4.01342  | -1.24558 | -2.01905 |
| O | 1.22158  | 0.46068  | 2.94242  |
| O | -1.22231 | -0.46461 | 2.94165  |
| C | -0.84367 | -1.94282 | -0.66601 |

|   |          |          |          |
|---|----------|----------|----------|
| C | -0.33247 | -2.10006 | -2.10002 |
| C | -1.64658 | -3.17812 | -0.22972 |
| H | 0.02824  | -1.87203 | -0.01087 |
| H | 0.16247  | -1.19083 | -2.45152 |
| H | 0.39464  | -2.91695 | -2.14233 |
| H | -1.14135 | -2.34582 | -2.79725 |
| H | -1.95672 | -3.10267 | 0.81728  |
| H | -2.54749 | -3.29393 | -0.84389 |
| H | -1.03946 | -4.08300 | -0.34108 |
| C | 0.84387  | 1.94338  | -0.66291 |
| C | 0.33303  | 2.10302  | -2.09690 |
| C | 1.64666  | 3.17827  | -0.22621 |
| H | -0.02821 | 1.87196  | -0.00806 |
| H | -0.16281 | 1.19313  | -2.44941 |
| H | -0.39406 | 2.91995  | -2.13860 |
| H | 1.14210  | 2.34845  | -2.79468 |
| H | 1.95754  | 3.10180  | 0.82079  |
| H | 2.54673  | 3.29467  | -0.84004 |
| H | 1.03957  | 4.08325  | -0.33585 |

**TS-DZ-syn (chloroform)**

**Imaginary frequency: -382.08 cm<sup>-1</sup>**

|   |          |          |          |
|---|----------|----------|----------|
| C | -2.70099 | -1.40176 | -0.71194 |
| C | -2.17193 | -0.16179 | -0.33894 |
| C | -1.10190 | 0.31316  | -1.11194 |
| C | -0.54894 | -0.41787 | -2.16094 |
| C | -1.11100 | -1.63784 | -2.51894 |
| C | -2.19602 | -2.12279 | -1.79094 |
| H | -3.52901 | -1.81673 | -0.14394 |
| H | 0.30308  | -0.00991 | -2.69694 |
| H | -0.70202 | -2.20486 | -3.34794 |
| H | -2.64306 | -3.07577 | -2.05394 |
| N | -0.47584 | 1.60313  | -0.89594 |
| N | 0.72215  | 1.55507  | 0.49606  |
| C | 1.91912  | 0.82602  | 0.12406  |
| C | 2.93215  | 1.48597  | -0.57094 |
| C | 1.99606  | -0.52599 | 0.47606  |
| C | 4.06312  | 0.77991  | -0.95194 |

|   |          |          |          |   |          |          |          |
|---|----------|----------|----------|---|----------|----------|----------|
| H | 2.80820  | 2.53597  | -0.81894 | H | 4.25401  | 0.89894  | 1.08895  |
| C | 3.15702  | -1.20804 | 0.09206  | H | 1.42501  | 0.23895  | -2.92305 |
| C | 4.17205  | -0.57209 | -0.61594 | H | 3.38702  | 1.78394  | -3.02205 |
| H | 4.85314  | 1.27287  | -1.50894 | H | 4.77902  | 2.11193  | -0.98505 |
| H | 3.27197  | -2.25505 | 0.35506  | N | 0.66900  | -1.19104 | -0.87305 |
| H | 5.05503  | -1.13213 | -0.90694 | N | -0.58900 | -0.97903 | -0.50605 |
| O | 0.87621  | 2.68207  | 0.93406  | C | -1.19199 | 0.30697  | -0.11905 |
| O | -1.21080 | 2.56616  | -0.76594 | C | -0.40998 | 1.46596  | -0.02605 |
| C | -2.71489 | 0.59224  | 0.86306  | C | -2.58499 | 0.36598  | 0.16895  |
| C | -2.87693 | -0.31376 | 2.09006  | C | -0.95898 | 2.69197  | 0.31595  |
| C | -4.03986 | 1.28530  | 0.51706  | H | 0.64802  | 1.44696  | -0.21305 |
| H | -1.99085 | 1.37020  | 1.12806  | C | -3.08998 | 1.63298  | 0.49895  |
| H | -1.94796 | -0.84480 | 2.32406  | C | -2.31798 | 2.78198  | 0.57495  |
| H | -3.14690 | 0.29326  | 2.96106  | H | -0.31297 | 3.56196  | 0.37495  |
| H | -3.66897 | -1.05672 | 1.94906  | H | -4.14898 | 1.72099  | 0.70995  |
| H | -3.91783 | 1.96829  | -0.32894 | H | -2.77597 | 3.72998  | 0.83695  |
| H | -4.80689 | 0.54734  | 0.25606  | O | -1.31401 | -2.00003 | -0.54805 |
| H | -4.40083 | 1.86232  | 1.37406  | O | 0.97799  | -2.36904 | -1.20905 |
| C | 0.92302  | -1.19194 | 1.32006  | C | 2.20800  | -0.85405 | 1.58295  |
| C | 1.34702  | -1.20896 | 2.79606  | C | 1.83401  | 0.13095  | 2.69795  |
| C | 0.56196  | -2.59592 | 0.83006  | C | 3.36300  | -1.76806 | 2.00895  |
| H | 0.02305  | -0.57690 | 1.24706  | H | 1.33900  | -1.49504 | 1.40095  |
| H | 1.54207  | -0.19597 | 3.16406  | H | 0.99301  | 0.76796  | 2.40595  |
| H | 0.55600  | -1.64992 | 3.41206  | H | 1.54700  | -0.41705 | 3.60195  |
| H | 2.25800  | -1.80200 | 2.93506  | H | 2.68001  | 0.77895  | 2.95295  |
| H | 0.31196  | -2.59291 | -0.23494 | H | 3.61899  | -2.47506 | 1.21395  |
| H | 1.37892  | -3.30696 | 0.99206  | H | 4.26000  | -1.19006 | 2.25695  |
| H | -0.30906 | -2.96588 | 1.38106  | H | 3.07799  | -2.34106 | 2.89695  |

**TS1-dihedra-DZ-anti-to-syn-direction1  
(chloroform)**

**Imaginary frequency: -54.85 cm<sup>-1</sup>**

|   |         |          |          |   |          |          |          |
|---|---------|----------|----------|---|----------|----------|----------|
| C | 3.62701 | 0.75494  | 0.21395  | H | -3.11500 | -1.68502 | 0.43895  |
| C | 2.53701 | -0.12005 | 0.29495  | H | -3.21900 | -1.20202 | -2.00405 |
| C | 1.76300 | -0.24505 | -0.86005 | H | -4.76201 | -1.82801 | -1.40205 |
| C | 2.05701 | 0.40195  | -2.05705 | H | -4.57899 | -0.09201 | -1.71805 |
| C | 3.14701 | 1.26094  | -2.10305 | H | -4.53800 | -0.31701 | 2.03995  |
| C | 3.92602 | 1.43994  | -0.95905 | H | -5.51699 | 0.19199  | 0.64595  |
|   |         |          |          | H | -5.38600 | -1.51501 | 1.05195  |

**TS2-dihedra-DZ-anti-to-syn-direction2  
(chloroform)**

**Imaginary frequency: -52.86 cm<sup>-1</sup>**

|   |          |          |          |
|---|----------|----------|----------|
| C | -3.01799 | -1.05891 | -0.24193 |
| C | -2.19496 | -0.00294 | 0.15807  |
| C | -1.23894 | 0.41503  | -0.77293 |
| C | -1.12096 | -0.12397 | -2.04893 |
| C | -1.95600 | -1.17394 | -2.41293 |
| C | -2.90001 | -1.64191 | -1.50193 |
| H | -3.76901 | -1.43488 | 0.44607  |
| H | -0.37795 | 0.27000  | -2.73493 |
| H | -1.86901 | -1.61895 | -3.39793 |
| H | -3.55704 | -2.46189 | -1.77593 |
| N | -0.43890 | 1.58100  | -0.47593 |
| N | 0.89310  | 1.64596  | -0.61393 |
| C | 1.95707  | 0.70192  | -0.10593 |
| C | 3.16009  | 1.41688  | 0.05307  |
| C | 1.93302  | -0.68408 | 0.18707  |
| C | 4.33407  | 0.81383  | 0.46407  |
| H | 3.16213  | 2.47388  | -0.15593 |
| C | 3.16100  | -1.25312 | 0.57707  |
| C | 4.34302  | -0.55117 | 0.71807  |
| H | 5.23009  | 1.41580  | 0.57607  |
| H | 3.17296  | -2.31813 | 0.78107  |
| H | 5.25001  | -1.06320 | 1.02607  |
| O | 1.29814  | 2.79494  | -0.91493 |
| O | -1.06486 | 2.67302  | -0.56693 |
| C | -2.32593 | 0.64107  | 1.52707  |
| C | -2.44197 | -0.39193 | 2.65307  |
| C | -3.51790 | 1.60811  | 1.54707  |
| H | -1.41791 | 1.22604  | 1.70807  |
| H | -1.62400 | -1.11796 | 2.62107  |
| H | -2.40795 | 0.11607  | 3.62207  |
| H | -3.38799 | -0.94189 | 2.60507  |
| H | -3.41387 | 2.37611  | 0.77607  |
| H | -4.45692 | 1.06915  | 1.37607  |
| H | -3.58488 | 2.10411  | 2.52207  |

|   |          |          |          |
|---|----------|----------|----------|
| C | 0.79098  | -1.69204 | 0.14007  |
| C | 0.63696  | -2.46304 | 1.46007  |
| C | 0.96295  | -2.65305 | -1.04393 |
| H | -0.14000 | -1.17101 | -0.00093 |
| H | 0.60798  | -1.78503 | 2.31807  |
| H | -0.30206 | -3.02700 | 1.43807  |
| H | 1.44493  | -3.18406 | 1.62507  |
| H | 1.02897  | -2.11005 | -1.99193 |
| H | 1.87093  | -3.25708 | -0.93693 |
| H | 0.10793  | -3.33302 | -1.09993 |

**DZ-anti-H<sub>2</sub>O (water)**

|   |          |          |          |
|---|----------|----------|----------|
| C | -3.12302 | 0.30494  | 1.53405  |
| C | -2.45301 | -0.13305 | 0.38505  |
| C | -1.13700 | -0.55502 | 0.57405  |
| C | -0.50000 | -0.58400 | 1.81005  |
| C | -1.19401 | -0.13702 | 2.92705  |
| C | -2.50702 | 0.30995  | 2.78105  |
| H | -4.15003 | 0.64492  | 1.44805  |
| H | 0.51701  | -0.94998 | 1.88705  |
| H | -0.71401 | -0.14201 | 3.89905  |
| H | -3.05803 | 0.65994  | 3.64805  |
| N | -0.39499 | -1.08900 | -0.55795 |
| N | 0.50400  | -0.37198 | -1.15595 |
| C | 0.69597  | 1.02402  | -0.79895 |
| C | 1.79396  | 1.37105  | -0.00895 |
| C | -0.19305 | 1.94600  | -1.33995 |
| C | 1.95393  | 2.73805  | 0.24405  |
| C | -0.00708 | 3.29300  | -1.06195 |
| H | -1.01205 | 1.60598  | -1.96495 |
| C | 1.06991  | 3.68403  | -0.26695 |
| H | 2.78992  | 3.06707  | 0.85305  |
| H | -0.69310 | 4.02899  | -1.46695 |
| H | 1.22588  | 4.73503  | -0.04595 |
| O | 1.19401  | -0.88897 | -2.08495 |
| O | -0.58496 | -2.28201 | -0.92695 |
| C | -3.14201 | -0.17706 | -0.96595 |
| C | -3.87304 | 1.13092  | -1.28595 |

|                                 |          |          |          |                                       |          |          |          |
|---------------------------------|----------|----------|----------|---------------------------------------|----------|----------|----------|
| C                               | -4.09998 | -1.37508 | -1.02795 | C                                     | -0.90824 | -1.67290 | -0.00090 |
| H                               | -2.37700 | -0.32305 | -1.73595 | C                                     | -1.57229 | -2.23683 | -1.26390 |
| H                               | -3.21006 | 1.99594  | -1.18895 | C                                     | -1.56130 | -2.23783 | 1.26810  |
| H                               | -4.24803 | 1.09891  | -2.31395 | H                                     | 0.13773  | -1.98402 | -0.00490 |
| H                               | -4.73204 | 1.28190  | -0.62395 | H                                     | -1.10025 | -1.84188 | -2.16890 |
| H                               | -3.57196 | -2.31507 | -0.83995 | H                                     | -1.47641 | -3.32684 | -1.27590 |
| H                               | -4.89498 | -1.27110 | -0.28095 | H                                     | -2.63927 | -1.99172 | -1.29690 |
| H                               | -4.56498 | -1.43309 | -2.01695 | H                                     | -1.08225 | -1.84388 | 2.16910  |
| C                               | 2.77698  | 0.34507  | 0.52205  | H                                     | -2.62827 | -1.99172 | 1.31110  |
| C                               | 3.08398  | 0.54807  | 2.00905  | H                                     | -1.46641 | -3.32784 | 1.27810  |
| C                               | 4.06398  | 0.36910  | -0.31395 | O                                     | 4.86386  | -0.78952 | -0.01590 |
| H                               | 2.32700  | -0.64794 | 0.41305  | H                                     | 5.55293  | -0.15260 | 0.20210  |
| H                               | 2.16698  | 0.59205  | 2.60505  | H                                     | 4.03592  | -0.27543 | -0.00990 |
| H                               | 3.69000  | -0.28591 | 2.37405  |                                       |          |          |          |
| H                               | 3.64896  | 1.47009  | 2.18005  |                                       |          |          |          |
| H                               | 3.85598  | 0.17209  | -1.36995 | <b>Nitrosobenzene-DE (chloroform)</b> |          |          |          |
| H                               | 4.55496  | 1.34510  | -0.23595 | C                                     | 4.02101  | 0.57802  | -0.92696 |
| H                               | 4.76400  | -0.39189 | 0.05005  | C                                     | 2.64501  | 0.77902  | -0.99696 |
| O                               | 1.25207  | -3.71897 | 0.87605  | C                                     | 1.83901  | 0.19703  | -0.02796 |
| H                               | 1.94206  | -3.45595 | 0.23605  | C                                     | 2.35801  | -0.55897 | 1.01804  |
| H                               | 0.43806  | -3.39199 | 0.46505  | C                                     | 3.73601  | -0.73798 | 1.08204  |
| O                               | 3.02805  | -2.85393 | -1.12295 | C                                     | 4.56501  | -0.17699 | 0.11104  |
| H                               | 3.74904  | -2.35291 | -0.72295 | H                                     | 4.66601  | 1.01801  | -1.67996 |
| H                               | 2.42304  | -2.17694 | -1.47895 | H                                     | 2.20101  | 1.37803  | -1.78496 |
|                                 |          |          |          | H                                     | 1.70300  | -0.99697 | 1.76204  |
|                                 |          |          |          | H                                     | 4.16100  | -1.31998 | 1.89404  |
|                                 |          |          |          | H                                     | 5.63901  | -0.32699 | 0.16504  |
| <b>M-H<sub>2</sub>O (water)</b> |          |          |          | N                                     | 0.42201  | 0.49503  | -0.08396 |
| C                               | -1.10777 | 2.67712  | 0.00210  | N                                     | -0.42199 | -0.49496 | -0.08496 |
| C                               | 0.12516  | 2.06099  | -0.00290 | O                                     | 0.04502  | 1.70204  | -0.16396 |
| C                               | 0.20302  | 0.65398  | -0.00390 | O                                     | -0.04500 | -1.70196 | -0.16696 |
| C                               | -0.95307 | -0.15590 | 0.00010  | C                                     | -1.83899 | -0.19696 | -0.02796 |
| C                               | -2.18900 | 0.50423  | 0.00510  | C                                     | -2.64500 | -0.77695 | -0.99896 |
| C                               | -2.26785 | 1.88924  | 0.00610  | C                                     | -2.35799 | 0.55605  | 1.02004  |
| H                               | -1.18065 | 3.75913  | 0.00310  | C                                     | -4.02099 | -0.57595 | -0.92796 |
| H                               | 1.04123  | 2.64189  | -0.00590 | H                                     | -2.20200 | -1.37295 | -1.78796 |
| H                               | -3.10406 | -0.07967 | 0.00810  | C                                     | -3.73599 | 0.73605  | 1.08404  |
| H                               | -3.24180 | 2.36835  | 0.00910  | H                                     | -1.70299 | 0.99204  | 1.76504  |
| N                               | 1.44294  | -0.01716 | -0.00790 | C                                     | -4.56499 | 0.17706  | 0.11104  |
| O                               | 2.44102  | 0.69874  | -0.01190 |                                       |          |          |          |



|   |          |          |          |
|---|----------|----------|----------|
| H | -4.66600 | -1.01294 | -1.68296 |
| H | -4.16099 | 1.31605  | 1.89704  |
| H | -5.63899 | 0.32806  | 0.16604  |

**Nitrosobenzene-DZ (chloroform)**

|   |          |          |          |
|---|----------|----------|----------|
| C | -3.02203 | -1.11108 | 0.82899  |
| C | -2.26808 | 0.05195  | 0.94099  |
| C | -1.39810 | 0.37999  | -0.09201 |
| C | -1.28106 | -0.39400 | -1.24001 |
| C | -2.04301 | -1.55404 | -1.33901 |
| C | -2.90700 | -1.91507 | -0.30601 |
| H | -3.70102 | -1.38911 | 1.62799  |
| H | -2.34511 | 0.69495  | 1.81199  |
| H | -0.60908 | -0.09597 | -2.03801 |
| H | -1.96399 | -2.17203 | -2.22701 |
| H | -3.49796 | -2.82110 | -0.38801 |
| N | -0.65415 | 1.61902  | 0.02099  |
| N | 0.65385  | 1.61908  | -0.02101 |
| C | 1.39790  | 0.38011  | 0.09199  |
| C | 2.26792  | 0.05215  | -0.94101 |
| C | 1.28094  | -0.39289 | 1.23999  |
| C | 3.02197  | -1.11081 | -0.82901 |
| H | 2.34489  | 0.69416  | -1.81201 |
| C | 2.04399  | -1.55386 | 1.33899  |
| H | 0.60992  | -0.09492 | 2.03799  |
| C | 2.90700  | -1.91482 | 0.30599  |
| H | 3.70098  | -1.38878 | -1.62801 |
| H | 1.96501  | -2.17186 | 2.22799  |
| H | 3.49904  | -2.82079 | 0.38799  |
| O | 1.27380  | 2.71211  | -0.08101 |
| O | -1.27420 | 2.71200  | 0.08099  |

**Nitrosobenzene-DE-TS (chloroform)**

**Imaginary frequency: -454.36 cm<sup>-1</sup>**

|   |          |          |          |
|---|----------|----------|----------|
| C | -4.02811 | -1.04470 | 0.39279  |
| C | -2.67982 | -1.27507 | 0.15246  |
| C | -1.88509 | -0.21704 | -0.28954 |
| C | -2.41030 | 1.05480  | -0.50417 |

|   |          |          |          |
|---|----------|----------|----------|
| C | -3.76677 | 1.26999  | -0.27137 |
| C | -4.57092 | 0.22554  | 0.18013  |
| H | -4.65935 | -1.85407 | 0.74547  |
| H | -2.23717 | -2.25383 | 0.30305  |
| H | -1.77086 | 1.85408  | -0.86045 |
| H | -4.19255 | 2.25357  | -0.44072 |
| H | -5.62626 | 0.39867  | 0.36711  |
| N | -0.48785 | -0.42356 | -0.59604 |
| N | 0.48786  | 0.42342  | 0.59616  |
| O | -0.14219 | -1.56597 | -0.87852 |
| O | 0.14214  | 1.56581  | 0.87870  |
| C | 1.88510  | 0.21699  | 0.28958  |
| C | 2.67972  | 1.27509  | -0.15246 |
| C | 2.41041  | -1.05481 | 0.50416  |
| C | 4.02801  | 1.04481  | -0.39287 |
| H | 2.23700  | 2.25382  | -0.30301 |
| C | 3.76688  | -1.26991 | 0.27127  |
| H | 1.77105  | -1.85414 | 0.86047  |
| C | 4.57093  | -0.22539 | -0.18027 |
| H | 4.65918  | 1.85424  | -0.74559 |
| H | 4.19273  | -2.25346 | 0.44057  |
| H | 5.62627  | -0.39845 | -0.36732 |

**Nitrosobenzene-DZ-TS (chloroform)**

**Imaginary frequency: -388.06 cm<sup>-1</sup>**

|   |          |          |          |
|---|----------|----------|----------|
| C | -3.68167 | -0.47164 | -0.63399 |
| C | -2.78848 | 0.57453  | -0.43356 |
| C | -1.64113 | 0.33866  | 0.32054  |
| C | -1.37485 | -0.90333 | 0.88726  |
| C | -2.28404 | -1.94045 | 0.69120  |
| C | -3.43080 | -1.72598 | -0.07189 |
| H | -4.57566 | -0.31066 | -1.22804 |
| H | -2.96274 | 1.55848  | -0.85682 |
| H | -0.47606 | -1.04616 | 1.47847  |
| H | -2.09658 | -2.91298 | 1.13473  |
| H | -4.13506 | -2.53720 | -0.22843 |
| N | -0.68459 | 1.39711  | 0.57844  |
| N | 0.68441  | 1.39687  | -0.57823 |

|   |          |          |          |
|---|----------|----------|----------|
| C | 1.64076  | 0.33820  | -0.32041 |
| C | 1.37397  | -0.90427 | -0.88587 |
| C | 2.78902  | 0.57470  | 0.43215  |
| C | 2.28352  | -1.94113 | -0.69005 |
| H | 0.47450  | -1.04789 | -1.47580 |
| C | 3.68250  | -0.47123 | 0.63247  |
| H | 2.96365  | 1.55900  | 0.85445  |
| C | 3.43112  | -1.72601 | 0.07158  |
| H | 2.09568  | -2.91397 | -1.13274 |
| H | 4.57707  | -0.30975 | 1.22550  |
| H | 4.13566  | -2.53704 | 0.22785  |
| O | 1.12377  | 2.53032  | -0.66980 |
| O | -1.12361 | 2.53068  | 0.67015  |
